# Supplementary material for: Formation and aromatization of strained bicyclic pyrazolidines via tandem reaction of alkyl 2-aroyl-1-chlorocyclopropanecarboxylates with acylhydrazones
Source: Royal Society of Chemistry journal article supplement (doi:10.1039/c5ob01199j), 2015-01-01
Supplement: c5ob01199j1.pdf [file c5ob01199j1.pdf]

## Supporting Information

### **Formation and Aromatization of Strained Bicyclic Pyrazolidines via Tandem Reaction of Alkyl 2-Aroyl-1-chlorocyclopropanecarboxylates with Acylhydrazones**

Zhimei Huang<sup>a</sup>, Junhao Hu<sup>a</sup> and Yuefa Gong<sup>a\*</sup>

School of Chemistry and Chemical Engineering, Huazhong University of Science and  
Technology, 1037 Luoyu Road, Wuhan 430074, People's Republic of China  
[gongyf@mail.hust.edu.cn](mailto:gongyf@mail.hust.edu.cn)

### Table of Contents

|                                                                                  |     |
|----------------------------------------------------------------------------------|-----|
| (1) General procedure: .....                                                     | S2  |
| (2) Characterization data of the new compounds. ....                             | S3  |
| (3) Copies of <sup>1</sup> H and <sup>13</sup> C NMR spectra of products.....    | S16 |
| (4) NOESY spectra for <b>4aa</b> 、 <b>4af</b> 、 <b>4ag</b> and <b>4ab</b> . .... | S64 |
| (5) Crystallographic information for compound <b>4aa</b> . ....                  | S68 |

**General Methods** All reagents and solvents were of commercial grade and purified prior to use when necessary. Reactions were monitored by TLC analysis using silica gel 60 A F-254 thin layer plates. Flash column chromatography was performed on silica gel 60 A, 10-40  $\mu\text{m}$ . All  $^1\text{H}$  NMR and  $^{13}\text{C}$  NMR spectra were recorded on a 400 or 600 MHz spectrometer with solvent resonances as the internal standard ( $^1\text{H}$  NMR:  $\text{CDCl}_3$  at 7.26 ppm; DMSO at 2.51 and 3.34 ppm;  $^{13}\text{C}$  NMR:  $\text{CDCl}_3$  at 77.0 ppm,  $^{13}\text{C}$  NMR: DMSO at 40.10 ppm). The following abbreviations are used to describe peak patterns where appropriate: s = singlet, d = doublet, t = triplet, q = quartet, m = multiplet, and br s = broad signal. All coupling constants ( $J$ ) are given in Hz. IR spectra were recorded on an infrared spectrometer. Melting point was recorded on a melting point detector. HRMS was measured on a TOF-Q mass spectrometer equipped with an ESI technique.

**(1) General procedure:**

**Scheme 1 Typical Procedure for Synthesis of 1a.**

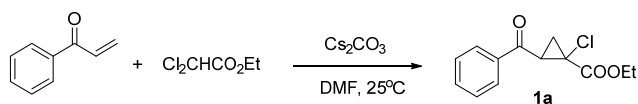

Terminal electron-deficient alkene (10 mmol) was added to a solution of ethyl dichloroacetate (10 mmol) and  $\text{Cs}_2\text{CO}_3$  (11 mmol) in 20mL DMF, the mixture was stirred at room temperature. The reaction was monitored by TLC until all the substrates terminal electron-deficient alkene disappeared. The mixture was then washed with water and extracted with  $\text{CH}_2\text{Cl}_2$ . Combined extracts were dried over anhydrous  $\text{Na}_2\text{SO}_4$  and concentrated under reduced pressure. The residue was purified by silica gel column chromatography using petroleum ether and ethyl acetate (20:1) as eluent to afford the corresponding product **1a** in 72% yield. Unless otherwise specified, all other products **1** were synthesized according to this typical procedure.

**Scheme 2 Typical Procedure for Synthesis of Compound of 3aa.**

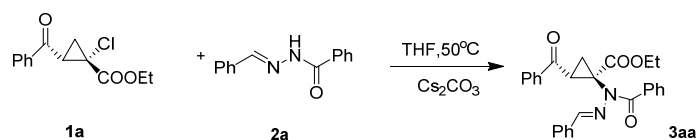

Substrates **1a** (50.5mg, 0.2 mmol), **2a** (44mg, 0.2 mmol) and base  $\text{Cs}_2\text{CO}_3$  (130mg, 0.4mmol) were added into 2.0 mL of THF, and the mixture was stirred at 50 °C. Followed by thin layer chromatography until all the substrate **1a** disappeared, the reaction was washed by water and extracted by  $\text{CH}_2\text{Cl}_2$  for two times. Then the organic solvent was dried over anhydrous  $\text{Na}_2\text{SO}_4$  and concentrated under reduced pressure. The residue was purified by silica gel column chromatography using petroleum ether/ethyl acetate (8:1) as the eluent to afford 66 mg of the corresponding **3aa** in 75% yield. Unless otherwise specified, all other products **4** were synthesized according to this typical procedure.

**Scheme 3 Typical Procedure for Synthesis of Compound of 4aa.**

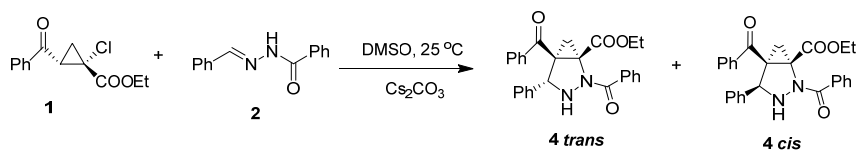

Substrates **1a** (0.2 mmol), **2a** (0.2 mmol) and base  $\text{Cs}_2\text{CO}_3$  (0.4mmol) were added into 2.0

mL of DMSO, and the mixture was stirred at room temperature. The reaction was followed by thin layer chromatography until all the substrate **1a** disappeared. The mixture was then washed with water and extracted with CH<sub>2</sub>Cl<sub>2</sub> for three times to remove DMSO. Combined extracts were dried over anhydrous Na<sub>2</sub>SO<sub>4</sub> and concentrated under reduced pressure. then purified by silica gel column chromatography using petroleum ether/ethyl acetate (8:1 to 2:1) as the eluent to afford **4aa** (trans and cis) successively. Unless otherwise specified, all other products **4** were synthesized according to this typical procedure.

**Scheme 4 Typical Procedure for Synthesis of Compound of 5ba.**

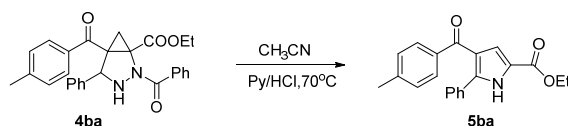

To a solution of the concentrated crude products of **4ba** in 2.0 ml of CH<sub>3</sub>CN was added pyridine (0.4 mmol, 32 μl), concentrated hydrochloric acid (84 μl, 1.0 mmol) which should be enough to keep the pH in 2-3. Then the mixture was stirred at 70 °C for 0.5 hour. The mixture was washed with water and extracted by CH<sub>2</sub>Cl<sub>2</sub> for two times. Combined extracts were dried over anhydrous Na<sub>2</sub>SO<sub>4</sub> and concentrated under reduced pressure. The residue was purified by silica gel column chromatography by using petroleum ether/ethyl acetate (10:1) to afford the corresponding pyrrole derivatives **5ba** in good yield. Unless otherwise specified, all other products **5** were synthesized according to this typical procedure.

**(2) Characterization data of the new compounds.**

**Ethyl (1S\*, 2S\*)-2-benzoyl-1-(1-benzoyl-2-((E)-benzylidene)hydrazinyl)cyclopropane-1-carboxylate (3aa)**

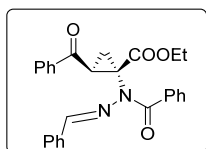

White solid (66 mg, 75%); mp 167-169 °C; <sup>1</sup>H NMR (400 MHz, CDCl<sub>3</sub>) δ 8.45 (s, 1H), 8.28 (d, *J* = 7.0 Hz, 2H), 7.84 – 7.78 (m, 2H), 7.64 (ddd, *J* = 6.7, 3.9, 1.2 Hz, 1H), 7.57 – 7.50 (m, 6H), 7.48 (dd, *J* = 8.0, 6.4 Hz, 2H), 7.38 – 7.33 (m, 3H), 4.17 (pd, *J* = 7.6, 3.6 Hz, 2H), 3.19 (s, 1H), 2.81 (dd, *J* = 8.8, 5.8 Hz, 1H), 2.07 (s, 1H), 1.15 (t, *J* = 7.1 Hz, 3H). <sup>13</sup>C NMR (101 MHz, CDCl<sub>3</sub>) δ 193.2, 171.0, 167.8, 164.2, 143.1, 136.4, 135.1, 134.4, 133.7, 130.6, 129.9, 129.8, 129.1, 128.7, 128.7, 127.6, 127.5, 127.3, 62.2, 42.5, 41.7, 37.2, 14.0. IR (KBr): 2982, 1734, 1674, 1613 cm<sup>-1</sup>. HRMS (ESI) *m/z* calcd. for: C<sub>27</sub>H<sub>24</sub>NaN<sub>2</sub>O<sub>4</sub> [M + Na]<sup>+</sup> 463.1634, found 463.1645.

**Ethyl (1S\*, 2S\*)-2-benzoyl-1-(1-benzoyl-2-((E)-2-methylpropylidene)hydrazinyl)cyclopropane-1-carboxylate (3ac)**

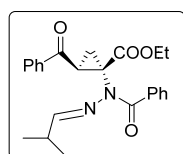

Yellow liquid (68 mg, 80%); <sup>1</sup>H NMR (400 MHz, CDCl<sub>3</sub>) δ 8.29 (d, *J* = 7.4 Hz, 2H), 7.74 (dd, *J* = 8.1, 1.3 Hz, 2H), 7.66 (d, *J* = 4.3 Hz, 1H), 7.63 – 7.58 (m, 1H), 7.51 (t, *J* = 7.5 Hz, 2H), 7.47 –

7.36 (m, 3H), 4.11 (qd,  $J = 7.1, 3.1$  Hz, 2H), 3.14 (t,  $J = 9.3$  Hz, 1H), 2.69 (dd,  $J = 8.6, 5.7$  Hz, 1H), 2.53 (dtd,  $J = 13.6, 6.8, 4.7$  Hz, 1H), 1.89 (dd,  $J = 10.1, 5.6$  Hz, 1H), 1.12 (t,  $J = 7.1$  Hz, 3H), 1.04 (dd,  $J = 6.8, 1.5$  Hz, 6H).  $^{13}\text{C}$  NMR (101 MHz,  $\text{CDCl}_3$ )  $\delta$  193.1, 170.8, 168.0, 136.4, 135.2, 133.6, 130.4, 129.7, 129.2, 128.7, 127.3, 61.9, 41.9, 37.3, 31.9, 23.9, 19.6, 14.0. IR (KBr): 2966, 1735, 1674, 1594  $\text{cm}^{-1}$ . HRMS (ESI)  $m/z$  calcd. for:  $\text{C}_{24}\text{H}_{26}\text{NaN}_2\text{O}_4$   $[\text{M} + \text{Na}]^+$  429.1791, found 429.1797.

**Ethyl (1S\*, 2S\*)-2-benzoyl-1-(1-benzoyl-2-((E)-4-chlorobenzylidene)hydrazinyl)**

**cyclopropane-1-carboxylate (3af)**

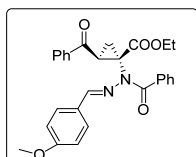

White solid (81 mg, 85%), mp 159-162  $^{\circ}\text{C}$ .  $^1\text{H}$  NMR (400 MHz,  $\text{CDCl}_3$ )  $\delta$  8.48 (s, 1H), 8.25 (s, 2H), 7.85 – 7.78 (m, 2H), 7.64 (t,  $J = 7.4$  Hz, 1H), 7.54 (t,  $J = 7.6$  Hz, 3H), 7.48 (dd,  $J = 11.7, 4.8$  Hz, 4H), 7.32 (d,  $J = 8.5$  Hz, 2H), 4.21 – 4.11 (m, 2H), 3.13 (s, 1H), 2.80 (dd,  $J = 8.8, 5.9$  Hz, 1H), 2.08 (d,  $J = 18.6$  Hz, 1H), 1.14 (t,  $J = 7.1$  Hz, 3H).  $^{13}\text{C}$  NMR (101 MHz,  $\text{CDCl}_3$ )  $\delta$  193.3, 171.9, 167.8, 136.2, 135.7, 134.8, 133.9, 133.0, 130.8, 129.8, 129.1, 128.9, 128.8, 128.7, 127.5, 62.2, 41.3, 37.1, 22.7, 14.0. IR (KBr): 2929, 1735, 1675, 1603  $\text{cm}^{-1}$ . HRMS (ESI)  $m/z$  calcd. for:  $\text{C}_{27}\text{H}_{23}\text{NaClN}_2\text{O}_4$   $[\text{M} + \text{Na}]^+$  497.1244, found 497.1239.

The product of **4** was obtained as two separable diastereomers. And the yield was the total amounts of two diastereomers.

**(1R\*, 4S\*, 5S\*)-ethyl 2, 5-dibenzoyl-4-phenyl-2,3-diazabicyclo[3.1.0]hexane-1-carboxylate (4aa)**

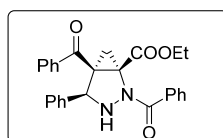

(78 mg, yield 89%), trans: white solid, mp 189-190  $^{\circ}\text{C}$ .  $^1\text{H}$  NMR (400 MHz,  $\text{CDCl}_3$ )  $\delta$  7.97 – 7.88 (m, 4H), 7.64 (t,  $J = 7.4$  Hz, 1H), 7.53 (t,  $J = 7.9$  Hz, 3H), 7.50 – 7.44 (m, 2H), 7.26 – 7.21 (m, 3H), 7.04 (dd,  $J = 6.3, 2.6$  Hz, 2H), 5.28 (s, 1H), 4.04 (q,  $J = 7.1$  Hz, 2H), 2.77 (d,  $J = 6.3$  Hz, 1H), 1.89 (d,  $J = 6.3$  Hz, 1H), 1.04 (t,  $J = 7.1$  Hz, 3H). cis: white solid, mp 222.3-225.7  $^{\circ}\text{C}$ .  $^1\text{H}$  NMR (400 MHz,  $\text{CDCl}_3$ )  $\delta$  7.62 (t,  $J = 7.4$  Hz, 4H), 7.50 (dd,  $J = 9.1, 6.7$  Hz, 1H), 7.43 (t,  $J = 7.5$  Hz, 3H), 7.24 – 7.18 (m, 2H), 7.03 (dd,  $J = 6.5, 2.5$  Hz, 2H), 6.27 (s, 3H), 5.27 (s, 1H), 4.01 (q,  $J = 7.1$  Hz, 1H), 3.24 – 3.17 (m, 2H), 2.75 (d,  $J = 6.3$  Hz, 1H), 1.88 (d,  $J = 6.3$  Hz, 1H), 1.01 (t,  $J = 7.1$  Hz, 3H).  $^{13}\text{C}$  NMR (101 MHz,  $\text{CDCl}_3$ )  $\delta$  194.7, 170.1, 166.3, 137.4, 135.4, 134.3, 133.8, 131.2, 129.1, 129.0, 128.7, 127.9, 126.4, 70.0, 62.0, 59.1, 56.4, 29.2, 13.8. IR (KBr): 3249, 1728, 1686, 1629  $\text{cm}^{-1}$ . HRMS (ESI)  $m/z$  calcd. for:  $\text{C}_{27}\text{H}_{24}\text{NaN}_2\text{O}_4$   $[\text{M} + \text{Na}]^+$  463.1634, found 463.1589.

**(1R\*, 4S\*, 5S\*)-ethyl**

**2-benzoyl-5-(4-methylbenzoyl)-4-phenyl-2,3-diazabicyclo[3.1.0]hexane-1-carboxylate (4ba)**

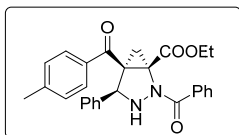

(78 mg, yield 86%), trans: white solid; mp 119-121 °C,  $^1\text{H NMR}$  (600 MHz,  $\text{CDCl}_3$ )  $\delta$  7.90 (d,  $J = 7.2$  Hz, 2H), 7.85 (d,  $J = 8.1$  Hz, 2H), 7.51 (t,  $J = 7.3$  Hz, 1H), 7.44 (t,  $J = 7.5$  Hz, 2H), 7.31 (d,  $J = 7.9$  Hz, 2H), 7.27 – 7.16 (m, 3H), 7.03 (d,  $J = 3.5$  Hz, 2H), 5.25 (s, 1H), 4.02 (dd,  $J = 14.2, 7.1$  Hz, 2H), 2.75 (d,  $J = 6.2$  Hz, 1H), 2.44 (s, 3H), 1.87 (d,  $J = 6.3$  Hz, 1H), 1.03 (t,  $J = 7.1$  Hz, 3H). **cis**: white solid, mp 242-244 °C.  $^1\text{H NMR}$  (600 MHz, DMSO)  $\delta$  7.75 (d,  $J = 7.6$  Hz, 2H), 7.66 (d,  $J = 8.1$  Hz, 2H), 7.43 (t,  $J = 7.4$  Hz, 1H), 7.34 (t,  $J = 7.7$  Hz, 2H), 7.32 – 7.28 (m, 2H), 7.26 (d,  $J = 8.0$  Hz, 2H), 7.19 – 7.15 (m, 3H), 6.79 (d,  $J = 7.0$  Hz, 1H), 4.84 (d,  $J = 7.0$  Hz, 1H), 4.32 – 4.02 (m, 2H), 2.44 (d,  $J = 5.9$  Hz, 1H), 2.35 (s, 3H), 2.24 (d,  $J = 5.8$  Hz, 1H), 1.23 (t,  $J = 7.0$  Hz, 3H).  $^{13}\text{C NMR}$  (151 MHz,  $\text{CDCl}_3$ )  $\delta$  194.22, 170.1, 166.4, 145.0, 137.5, 134.3, 132.8, 131.2, 129.7, 129.2, 129.1, 128.7, 127.8, 127.8, 126.4, 67.1, 62.0, 58.9, 56.5, 29.6, 21.8, 13.9. IR (KBr): 3241, 1731, 1669, 1622  $\text{cm}^{-1}$ ; HRMS (ESI)  $m/z$  calcd. for:  $\text{C}_{28}\text{H}_{26}\text{NaN}_2\text{O}_4[\text{M} + \text{Na}]^+$  477.1791, found 477.1763

**(1R\*,4S\*,5S\*)-ethyl**

**2-benzoyl-5-(4-methoxybenzoyl)-4-phenyl-2,3-diazabicyclo[3.1.0]hexane-1-carboxylate (4ca)**

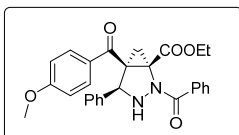

(73 mg, yield 78%), trans: white solid; mp 166-170 °C,  $^1\text{H NMR}$  (400 MHz,  $\text{CDCl}_3$ )  $\delta$  7.86 – 7.77 (m, 4H), 7.52 (t,  $J = 7.4$  Hz, 1H), 7.45 – 7.38 (m, 3H), 7.34 (t,  $J = 7.3$  Hz, 2H), 7.13 – 7.10 (m, 3H), 6.93 (dd,  $J = 6.6, 2.4$  Hz, 2H), 5.16 (s, 1H), 3.91 (q,  $J = 7.1$  Hz, 2H), 2.65 (d,  $J = 6.3$  Hz, 1H), 1.77 (d,  $J = 6.3$  Hz, 1H), 0.90 (t,  $J = 7.1$  Hz, 3H). **cis**: white solid; mp 245-248 °C,  $^1\text{H NMR}$  (600 MHz, DMSO)  $\delta$  7.76 (d,  $J = 7.4$  Hz, 2H), 7.67 (d,  $J = 7.7$  Hz, 2H), 7.43 (t,  $J = 7.0$  Hz, 1H), 7.34 (t,  $J = 7.5$  Hz, 2H), 7.31 (d,  $J = 3.4$  Hz, 2H), 7.27 (d,  $J = 7.6$  Hz, 2H), 7.17 (s, 1H), 6.79 (s, 3H), 4.84 (s, 1H), 4.29 - 4.13 (m, 2H), 2.45 (d,  $J = 5.3$  Hz, 1H), 2.36 (s, 2H), 2.25 (d,  $J = 5.3$  Hz, 1H), 1.24 (t,  $J = 6.3$  Hz, 3H).  $^{13}\text{C NMR}$  (101 MHz,  $\text{CDCl}_3$ )  $\delta$  194.7, 170.1, 166.4, 137.4, 135.4, 134.2, 133.9, 131.2, 129.1, 129.0, 128.7, 127.9, 126.4, 67.0, 62.1, 59.1, 56.4, 29.4, 13.8. IR (KBr): 3250, 1729, 1683, 1628  $\text{cm}^{-1}$ . HRMS (ESI)  $m/z$  calcd. for:  $\text{C}_{28}\text{H}_{26}\text{NaN}_2\text{O}_5[\text{M} + \text{Na}]^+$  477.1791, found 477.1763.

**(1R\*, 4S\*, 5S\*)-ethyl**

**2-benzoyl-5-(4-chlorobenzoyl)-4-phenyl-2,3-diazabicyclo[3.1.0]hexane-1-carboxylate (4da)**

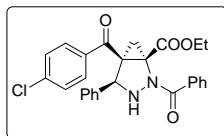

(83 mg, yield 87%), trans: white solid; mp 186-191 °C,  $^1\text{H NMR}$  (600 MHz,  $\text{CDCl}_3$ )  $\delta$  7.88 (dd,  $J = 15.1, 7.9$  Hz, 4H), 7.49 (dd,  $J = 19.8, 7.9$  Hz, 3H), 7.44 (t,  $J = 7.5$  Hz, 2H), 7.25 – 7.19 (m, 3H), 7.02 (d,  $J = 4.0$  Hz, 2H), 6.24 (s, 1H), 5.24 (s, 1H), 4.04 (q,  $J = 7.0$  Hz, 2H), 2.71 (d,  $J = 6.3$  Hz, 1H), 1.92 (d,  $J = 6.3$  Hz, 1H), 1.05 (t,  $J = 7.1$  Hz, 3H). **cis**: white solid; mp 249-254 °C,  $^1\text{H NMR}$  (600 MHz, DMSO)  $\delta$  7.73 (d, 4H), 7.51 (d,  $J = 7.4$  Hz, 2H), 7.43 (t,  $J = 6.9$  Hz, 1H), 7.33 (t,  $J = 7.2$  Hz, 2H), 7.28 (s, 2H), 7.18 (s, 3H), 6.81 (d,  $J = 6.3$  Hz, 1H), 4.83 (d,  $J = 6.5$  Hz, 1H),

4.30-4.15 (m, 2H), 2.47 (d,  $J = 5.0$  Hz, 1H), 2.31 (d,  $J = 5.0$  Hz, 1H), 1.24 (d,  $J = 6.5$  Hz, 3H).  $^{13}\text{C}$  NMR (151 MHz,  $\text{CDCl}_3$ )  $\delta$  193.7, 170.0, 166.3, 140.4, 137.2, 134.2, 133.7, 131.3, 130.4, 129.3, 129.1, 128.8, 128.0, 127.9, 126.3, 67.0, 62.1, 58.9, 55.9, 29.0, 13.9. IR (KBr): 3239, 1731, 1685, 1631  $\text{cm}^{-1}$ . HRMS (ESI)  $m/z$  calcd. for:  $\text{C}_{27}\text{H}_{23}\text{ClNaN}_2\text{O}_4$  [ $\text{M} + \text{Na}$ ] $^+$  497.1244, found 497.1243.

**(1R\*,4S\*,5S\*)-ethyl**

**2-benzoyl-5-(4-bromobenzoyl)-4-phenyl-2,3-diazabicyclo[3.1.0]hexane-1-carboxylate (4ea)**

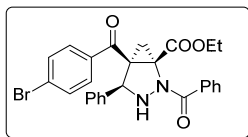

(73 mg, yield 70%), trans: white solid; mp 147 -149  $^{\circ}\text{C}$ ;  $^1\text{H}$  NMR (600 MHz,  $\text{CDCl}_3$ )  $\delta$  7.92 – 7.87 (m, 2H), 7.79 (d,  $J = 8.5$  Hz, 2H), 7.66 (d,  $J = 8.2$  Hz, 2H), 7.54 – 7.49 (m, 1H), 7.45 (dd,  $J = 10.8$ , 4.3 Hz, 2H), 7.24 (d,  $J = 5.0$  Hz, 3H), 7.05 – 7.00 (m, 2H), 5.24 (s, 1H), 4.05 (dd,  $J = 13.5$ , 6.4 Hz, 2H), 2.72 (d,  $J = 6.4$  Hz, 1H), 1.92 (d,  $J = 6.4$  Hz, 1H), 1.06 (td,  $J = 7.1$ , 1.8 Hz, 3H). cis: white solid; mp 265-269  $^{\circ}\text{C}$ ;  $^1\text{H}$  NMR (600 MHz, DMSO)  $\delta$  7.74 (d,  $J = 7.4$  Hz, 2H), 7.69 – 7.62 (m, 4H), 7.43 (t,  $J = 7.4$  Hz, 1H), 7.33 (t,  $J = 7.7$  Hz, 2H), 7.29 (dd,  $J = 6.4$ , 2.7 Hz, 2H), 7.20 – 7.14 (m, 3H), 6.81 (d,  $J = 7.0$  Hz, 1H), 4.83 (d,  $J = 7.0$  Hz, 1H), 4.29 – 4.11 (m, 2H), 2.46 (d,  $J = 5.9$  Hz, 1H), 2.31 (d,  $J = 5.9$  Hz, 1H), 1.24 (t,  $J = 7.0$  Hz, 3H).  $^{13}\text{C}$  NMR (151 MHz,  $\text{CDCl}_3$ )  $\delta$  194.0, 170.0, 166.2, 137.1, 134.2, 134.1, 132.3, 131.3, 130.5, 129.2, 129.1, 128.2, 128.8, 128.0, 127.9, 126.3, 67.0, 62.2, 59.0, 55.9, 29.1, 13.9. IR (KBr): 3252, 1727, 1688, 1627  $\text{cm}^{-1}$ ; HRMS (ESI)  $m/z$  calcd. for:  $\text{C}_{27}\text{H}_{23}\text{BrNaN}_2\text{O}_4$  [ $\text{M} + \text{Na}$ ] $^+$  541.0739, found 541.0734.

**(1R\*, 4S\*, 5S\*)-ethyl**

**5-([1,1'-biphenyl]-3-carbonyl)-2-benzoyl-4-phenyl-2,3-diazabicyclo[3.1.0]hexane-1-carboxylate (4fa)**

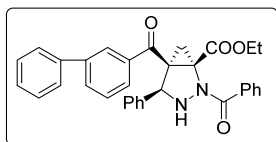

(86 mg, yield 84%), trans: yellow liquid;  $^1\text{H}$  NMR (600 MHz,  $\text{CDCl}_3$ )  $\delta$  8.04 (d,  $J = 8.2$  Hz, 2H), 7.92 (t,  $J = 11.4$  Hz, 2H), 7.75 (d,  $J = 8.2$  Hz, 2H), 7.66 (d,  $J = 7.3$  Hz, 2H), 7.52 (dt,  $J = 15.1$ , 7.6 Hz, 3H), 7.45 (dt,  $J = 13.3$ , 7.6 Hz, 3H), 7.26 – 7.21 (m, 3H), 7.07 (d,  $J = 3.2$  Hz, 2H), 5.31 (s, 1H), 4.06 (q,  $J = 7.0$  Hz, 2H), 2.80 (d,  $J = 6.2$  Hz, 1H), 1.93 (d,  $J = 6.2$  Hz, 1H), 1.06 (t,  $J = 7.1$  Hz, 3H). cis: white solid; mp 235 -237  $^{\circ}\text{C}$ .  $^1\text{H}$  NMR (600 MHz, DMSO)  $\delta$  7.85 (d,  $J = 8.2$  Hz, 2H), 7.79 – 7.75 (m, 4H), 7.73 (d,  $J = 7.6$  Hz, 2H), 7.51 (t,  $J = 7.6$  Hz, 2H), 7.44 (dd,  $J = 9.9$ , 7.4 Hz, 2H), 7.34 (t,  $J = 7.6$  Hz, 4H), 7.18 (d,  $J = 4.0$  Hz, 3H), 6.85 (d,  $J = 6.8$  Hz, 1H), 4.90 (d,  $J = 6.9$  Hz, 1H), 4.31 – 4.14 (m, 2H), 2.32 (d,  $J = 5.8$  Hz, 1H), 1.25 (t,  $J = 6.9$  Hz, 3H).  $^{13}\text{C}$  NMR (151 MHz,  $\text{CDCl}_3$ )  $\delta$  194.3, 170.1, 166.4, 146.5, 139.5, 137.4, 134.3, 134.0, 131.3, 129.7, 129.1, 129.1, 128.7, 128.6, 127.9, 127.5, 127.3, 126.4, 67.1, 62.1, 60.4, 59.0, 56.4, 29.5, 21.1, 13.9; IR (KBr): 3213, 1733, 1676, 1645, 1602  $\text{cm}^{-1}$ . HRMS (ESI)  $m/z$  calcd. for:  $\text{C}_{33}\text{H}_{28}\text{NaN}_2\text{O}_4$  [ $\text{M} + \text{Na}$ ] $^+$  539.1947, found 539.1956.

**(1R\*, 4S\*, 5S\*)-ethyl 2-benzoyl-4-phenyl-5-(thiophene-2-carbonyl)-2,3-diazabicyclo[3.1.0]hexane-1-carboxylate (4ga)**

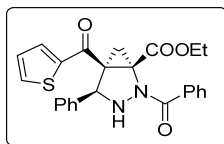

(101 mg, yield 76%), *trans*: Colourless liquid;  $^1\text{H NMR}$  (600 MHz,  $\text{CDCl}_3$ )  $\delta$  7.88 (d,  $J = 7.3$  Hz, 2H), 7.82 (d,  $J = 3.1$  Hz, 1H), 7.76 (d,  $J = 4.4$  Hz, 1H), 7.50 (t,  $J = 7.4$  Hz, 1H), 7.44 (t,  $J = 7.5$  Hz, 2H), 7.22 – 7.16 (m, 4H), 7.04 (d,  $J = 4.3$  Hz, 2H), 5.28 (s, 1H), 4.08 – 3.96 (m, 2H), 2.82 (d,  $J = 6.2$  Hz, 1H), 1.85 (d,  $J = 6.3$  Hz, 1H), 1.03 (t,  $J = 7.1$  Hz, 3H). *cis*: yellow solid; mp 190-194 °C.  $^1\text{H NMR}$  (600 MHz, DMSO)  $\delta$  8.02 (d,  $J = 2.8$  Hz, 1H), 7.96 (d,  $J = 4.1$  Hz, 1H), 7.75 (d,  $J = 7.2$  Hz, 2H), 7.46 – 7.37 (m, 3H), 7.34 (t,  $J = 7.5$  Hz, 2H), 7.26 – 7.19 (m, 4H), 6.83 (d,  $J = 6.7$  Hz, 1H), 4.93 (d,  $J = 7.0$  Hz, 1H), 4.26- 4.13 (m, 2H), 2.41 (d,  $J = 5.6$  Hz, 1H), 2.28 (d,  $J = 5.6$  Hz, 1H), 1.21 (t,  $J = 6.6$  Hz, 3H).  $^{13}\text{C NMR}$  (151 MHz,  $\text{CDCl}_3$ )  $\delta$  186.8, 170.2, 166.3, 142.1, 137.4, 135.5, 134.3, 133.9, 131.2, 129.1, 128.7, 128.6, 127.8, 127.8, 126.4, 67.6, 62.0, 58.5, 57.4, 30.4, 13.8. IR (KBr): 3240, 1737, 1646, 1632  $\text{cm}^{-1}$ ; HRMS (ESI)  $m/z$  calcd. for:  $\text{C}_{25}\text{H}_{22}\text{NaN}_2\text{O}_4\text{S}$  [ $\text{M} + \text{Na}$ ] $^+$  469.1198, found 469.1190.

### Ethyl

**(1S\*,4S\*,5R\*)-2-benzoyl-5-(4-bromobenzoyl)-4-phenyl-2,3-diazabicyclo[3.1.0]hexane-1-carboxylate (4ha)**

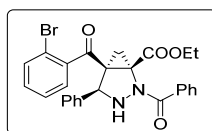

(67 mg, yield 56%), *trans* : yellow liquid;  $^1\text{H NMR}$  (600 MHz,  $\text{CDCl}_3$ )  $\delta$  7.94 (d,  $J = 7.4$  Hz, 2H), 7.86 (d,  $J = 7.3$  Hz, 2H), 7.64 (t,  $J = 7.4$  Hz, 1H), 7.55 – 7.49 (m, 3H), 7.44 (t,  $J = 7.7$  Hz, 2H), 7.17 (d,  $J = 8.4$  Hz, 2H), 6.95 (d,  $J = 8.4$  Hz, 2H), 5.21 (s, 1H), 4.00 (q,  $J = 7.0$  Hz, 2H), 2.76 (d,  $J = 6.3$  Hz, 1H), 1.80 (d,  $J = 6.3$  Hz, 1H), 0.99 (t,  $J = 7.1$  Hz, 3H).  $^{13}\text{C NMR}$  (151 MHz,  $\text{CDCl}_3$ )  $\delta$  194.40, 170.32, 166.31, 136.12, 135.22, 134.16, 133.99, 133.66, 131.30, 129.06, 129.02, 128.87, 128.84, 127.87, 127.80, 66.54, 62.08, 59.43, 56.55, 13.81. *cis*: white solid; mp 128-130 °C.  $^1\text{H NMR}$  (400 MHz, DMSO)  $\delta$  7.58 (d,  $J = 7.3$  Hz, 2H), 7.52 – 7.48 (m, 1H), 7.38 (t,  $J = 7.4$  Hz, 1H), 7.28 (dt,  $J = 15.1, 4.7$  Hz, 4H), 7.18 (ddd,  $J = 13.8, 9.0, 4.1$  Hz, 6H), 6.66 (d,  $J = 5.9$  Hz, 1H), 4.48 (d,  $J = 5.9$  Hz, 1H), 4.41- 4.18 (m, 2H), 2.61 (d,  $J = 6.0$  Hz, 1H), 2.41 (d,  $J = 6.0$  Hz, 1H), 1.32 (t,  $J = 7.1$  Hz, 3H).  $^{13}\text{C NMR}$  (101 MHz, DMSO)  $\delta$  197.3, 166.6, 165.1, 140.5, 139.5, 134.3, 133.8, 132.8, 131.2, 129.8, 129.5, 128.8, 128.1, 127.9, 127.6, 127.7, 118.8, 63.6, 61.5, 54.8, 52.5, 25.5, 14.4. IR (KBr): 3245, 1734, 1692, 1619  $\text{cm}^{-1}$ ; HRMS (ESI)  $m/z$  calcd. for:  $\text{C}_{27}\text{H}_{23}\text{NaBrN}_2\text{O}_4$  [ $\text{M} + \text{Na}$ ] $^+$  541.0739, found 541.0734.

**Methyl (1S\*,4R\*,5R\*)-2,5-dibenzoyl-4-phenyl-2,3-diazabicyclo[3.1.0]hexane-1-carboxylate (4ia)**

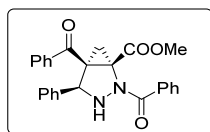

(66 mg, yield 78%), *trans*: colorless liquid;  $^1\text{H NMR}$  (600 MHz,  $\text{CDCl}_3$ )  $\delta$  7.91 (d,  $J = 7.6$  Hz, 4H), 7.61 (t,  $J = 7.2$  Hz, 1H), 7.50 (t,  $J = 7.4$  Hz, 3H), 7.43 (t,  $J = 7.5$  Hz, 2H), 7.21 (s, 3H), 7.03 (d,  $J = 4.1$  Hz, 2H), 5.27 (s, 1H), 3.56 (s, 3H), 2.74 (d,  $J = 6.2$  Hz, 1H), 1.91 (d,  $J = 6.2$  Hz, 1H).

**cis:** white solid; mp 157-159 °C. <sup>1</sup>H NMR (600 MHz, DMSO) δ 7.76 (d, *J* = 7.4 Hz, 2H), 7.73 (d, *J* = 7.3 Hz, 2H), 7.59 (t, *J* = 7.4 Hz, 1H), 7.44 (dd, *J* = 15.8, 7.9 Hz, 3H), 7.34 (t, *J* = 7.7 Hz, 2H), 7.28 – 7.23 (m, 2H), 7.18 – 7.12 (m, 3H), 6.82 (d, *J* = 7.0 Hz, 3H), 4.85 (d, *J* = 7.0 Hz, 1H), 3.76 (s, 3H), 2.49 (d, *J* = 5.9 Hz, 1H), 2.32 (d, *J* = 5.9 Hz, 1H). <sup>13</sup>C NMR (151 MHz, DMSO) δ 193.6, 167.5, 167.1, 139.0, 136.2, 134.3, 134.0, 131.4, 129.7, 129.1, 128.8, 128.6, 128.2, 128.1, 128.0, 66.0, 52.8, 52.0, 23.8, 18.8. IR (KBr): 3257, 1730, 1683, 1627 cm<sup>-1</sup>; HRMS (ESI) *m/z* calcd. for: C<sub>26</sub>H<sub>22</sub>NaN<sub>2</sub>O<sub>4</sub> [M + Na]<sup>+</sup> 449.1478, found 449.1456.

**(1R\*, 4S\*, 5S\*)-ethyl 2,5-dibenzoyl-4-ethyl-2,3-diazabicyclo[3.1.0]hexane-1-carboxylate (4ab)**

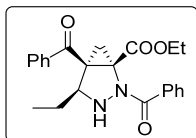

(68 mg, yields 87%), **trans:** yellow liquid. <sup>1</sup>H NMR (600 MHz, CDCl<sub>3</sub>) δ 8.02 (d, *J* = 7.6 Hz, 2H), 7.86 (d, *J* = 6.9 Hz, 2H), 7.63 (t, *J* = 7.2 Hz, 1H), 7.52 (t, *J* = 7.6 Hz, 2H), 7.46 (t, *J* = 7.2 Hz, 1H), 7.40 (t, *J* = 7.5 Hz, 2H), 4.21-4.11 (m, 2H), 3.44 (s, 1H), 2.70 (d, *J* = 5.5 Hz, 1H), 2.09 (d, *J* = 5.6 Hz, 1H), 1.56 (dd, *J* = 15.5, 7.8 Hz, 2H), 1.18 (t, *J* = 6.5 Hz, 3H), 0.88 (t, *J* = 7.3 Hz, 3H). **cis:** white solid; mp 173-174 °C. <sup>1</sup>H NMR (600 MHz, CDCl<sub>3</sub>) δ 8.01 (d, *J* = 7.9 Hz, 2H), 7.85 (d, *J* = 7.2 Hz, 2H), 7.62 (t, *J* = 7.2 Hz, 1H), 7.51 (t, *J* = 7.6 Hz, 2H), 7.45 (t, *J* = 7.1 Hz, 1H), 7.38 (t, *J* = 7.6 Hz, 2H), 4.20-4.11 (m, 2H), 3.44 (d, *J* = 2.8 Hz, 1H), 2.67 (d, *J* = 5.6 Hz, 1H), 2.09 (d, *J* = 5.7 Hz, 1H), 1.62 – 1.46 (m, 2H), 1.18 (t, *J* = 6.7 Hz, 3H), 0.87 (t, *J* = 7.4 Hz, 3H). <sup>13</sup>C NMR (151 MHz, CDCl<sub>3</sub>) δ 192.9, 169.1, 167.1, 135.8, 134.1, 134.0, 131.0, 129.2, 128.9, 127.7, 70.0, 61.9, 56.0, 53.8, 33.4, 23.3, 14.0, 11.6. IR (KBr): 3255, 1730, 1677, 1633 cm<sup>-1</sup>; HRMS (ESI) *m/z* calcd. for: C<sub>23</sub>H<sub>24</sub>NaN<sub>2</sub>O<sub>4</sub> [M + Na]<sup>+</sup> 415.1634, found 415.1599.

**(1R\*, 4R\*, 5S\*)-ethyl 2,5-dibenzoyl-4-isopropyl-2,3-diazabicyclo[3.1.0]hexane-1-carboxylate (4ac)**

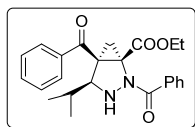

(67 mg, yield 83%), **trans:** yellow liquid; <sup>1</sup>H NMR (400 MHz, CDCl<sub>3</sub>) δ 7.96 – 7.91 (m, 2H), 7.87 – 7.83 (m, 2H), 7.64 – 7.58 (m, 1H), 7.52 (t, *J* = 7.6 Hz, 2H), 7.48 – 7.43 (m, 1H), 7.41 – 7.36 (m, 2H), 3.96 – 3.90 (m, 2H), 3.56 (d, *J* = 10.4 Hz, 1H), 2.89 (d, *J* = 6.2 Hz, 1H), 2.11 – 2.00 (m, 1H), 1.53 (qd, *J* = 19.3, 12.7, 6.4 Hz, 1H), 0.93 (t, *J* = 7.1 Hz, 3H), 0.83 (d, *J* = 6.7 Hz, 3H), 0.80 (d, *J* = 6.5 Hz, 3H). **cis:** white solid; mp 139-140 °C. <sup>1</sup>H NMR (600 MHz, CDCl<sub>3</sub>) δ 8.02 (d, *J* = 7.6 Hz, 2H), 7.91 (d, *J* = 4.5 Hz, 2H), 7.62 (t, *J* = 7.4 Hz, 1H), 7.51 (t, *J* = 7.8 Hz, 2H), 7.45 (t, *J* = 7.4 Hz, 1H), 7.39 (t, *J* = 7.5 Hz, 2H), 4.18-4.04 (m, 2H), 3.28 (d, *J* = 6.6 Hz, 1H), 2.67 (d, *J* = 5.8 Hz, 1H), 2.07 (d, *J* = 5.9 Hz, 1H), 1.88 (dd, *J* = 13.4, 6.7 Hz, 1H), 1.14 (s, 3H), 1.01 (d, *J* = 6.7 Hz, 3H), 0.86 (d, *J* = 6.6 Hz, 3H). <sup>13</sup>C NMR (101 MHz, CDCl<sub>3</sub>) δ 194.3, 169.9, 166.5, 135.4, 134.2, 133.5, 130.9, 129.0, 129.0, 128.5, 127.7, 70.8, 62.0, 59.5, 55.0, 29.8, 27.1, 21.0, 18.8, 13.8. IR (KBr): 3244, 1730, 1685, 1629 cm<sup>-1</sup>; HRMS (ESI) *m/z* calcd. for: C<sub>24</sub>H<sub>26</sub>NaN<sub>2</sub>O<sub>4</sub> [M + Na]<sup>+</sup> 429.1791, found 429.1786.

**(1R\*, 4S\*, 5S\*)-ethyl 2,5-dibenzoyl-4-butyl-2,3-diazabicyclo[3.1.0]hexane-1-carboxylate (4ad)**



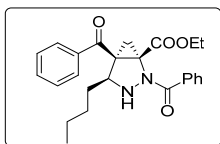

(71 mg, yield 81%), trans: yellow liquid.  $^1\text{H NMR}$  (600 MHz,  $\text{CDCl}_3$ )  $\delta$  7.94 (d,  $J = 7.6$  Hz, 2H), 7.86 (d,  $J = 7.4$  Hz, 2H), 7.61 (t,  $J = 7.3$  Hz, 1H), 7.51 (t,  $J = 7.6$  Hz, 2H), 7.45 (t,  $J = 7.3$  Hz, 1H), 7.39 (t,  $J = 7.5$  Hz, 2H), 4.03-3.93 (m, 3H), 2.74 (d,  $J = 6.3$  Hz, 1H), 2.16 (d,  $J = 6.3$  Hz, 1H), 1.43 (dd,  $J = 13.7, 8.2$  Hz, 2H), 1.22 – 1.09 (m, 4H), 1.01 (t,  $J = 7.1$  Hz, 3H), 0.75 (t,  $J = 6.7$  Hz, 3H). **cis**: oil.  $^1\text{H NMR}$  (600 MHz,  $\text{CDCl}_3$ )  $\delta$  8.01 (d,  $J = 7.4$  Hz, 2H), 7.85 (d,  $J = 7.4$  Hz, 2H), 7.63 (t,  $J = 7.4$  Hz, 1H), 7.52 (t,  $J = 7.7$  Hz, 2H), 7.46 (t,  $J = 7.4$  Hz, 1H), 7.40 (t,  $J = 7.6$  Hz, 2H), 4.19-4.10 (m, 2H), 3.50 (d,  $J = 3.7$  Hz, 1H), 2.71 (d,  $J = 5.6$  Hz, 1H), 2.10 (d,  $J = 5.7$  Hz, 1H), 1.59 – 1.43 (m, 2H), 1.33 (dt,  $J = 10.6, 5.6$  Hz, 1H), 1.17 (dt,  $J = 13.3, 6.6$  Hz, 6H), 0.74 (t,  $J = 7.1$  Hz, 3H).  $^{13}\text{C NMR}$  (151 MHz,  $\text{CDCl}_3$ )  $\delta$  194.5, 169.7, 166.4, 135.5, 134.2, 133.7, 131.0, 129.1, 128.9, 128.8, 127.7, 63.9, 61.9, 57.8, 54.8, 30.5, 28.6, 25.5, 22.3, 13.9, 13.7. IR (KBr): 3247, 1736, 1690, 1653  $\text{cm}^{-1}$ . HRMS (ESI)  $m/z$  calcd. for:  $\text{C}_{25}\text{H}_{28}\text{NaN}_2\text{O}_4[\text{M} + \text{Na}]^+$  443.1947. found 443.1966.

**(1R\*, 4S\*, 5S\*)-ethyl 2,5-dibenzoyl-4-(p-tolyl)-2,3-diazabicyclo[3.1.0]hexane-1-carboxylate (4ae)**

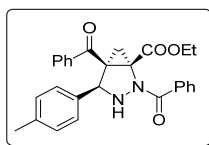

(73 mg, yield 81%), trans: colorless liquid.  $^1\text{H NMR}$  (600 MHz,  $\text{CDCl}_3$ )  $\delta$  7.94 (d,  $J = 7.4$  Hz, 2H), 7.91 (d,  $J = 7.3$  Hz, 2H), 7.63 (t,  $J = 7.4$  Hz, 1H), 7.54 – 7.48 (m, 3H), 7.45 (t,  $J = 7.5$  Hz, 2H), 7.03 (d,  $J = 7.9$  Hz, 2H), 6.92 (d,  $J = 7.9$  Hz, 2H), 5.24 (s, 1H), 4.03 (q,  $J = 7.0$  Hz, 2H), 2.75 (d,  $J = 6.3$  Hz, 1H), 2.29 (s, 3H), 1.90 (d,  $J = 6.3$  Hz, 1H), 1.03 (t,  $J = 7.1$  Hz, 3H). **cis**: white solid; mp 167-170  $^\circ\text{C}$ .  $^1\text{H NMR}$  (600 MHz, DMSO)  $\delta$  7.81 – 7.70 (m, 4H), 7.60 (t,  $J = 7.4$  Hz, 1H), 7.48 – 7.40 (m, 3H), 7.34 (t,  $J = 7.7$  Hz, 2H), 7.17 (d,  $J = 8.0$  Hz, 2H), 6.97 (d,  $J = 7.9$  Hz, 2H), 6.75 (d,  $J = 7.0$  Hz, 1H), 4.79 (d,  $J = 7.0$  Hz, 1H), 4.33 – 4.07 (m, 2H), 2.44 (d,  $J = 5.9$  Hz, 1H), 2.26 (d,  $J = 5.9$  Hz, 1H), 2.19 (s, 3H), 1.24 (t,  $J = 7.0$  Hz, 3H).  $^{13}\text{C NMR}$  (151 MHz,  $\text{CDCl}_3$ )  $\delta$  194.8, 170.0, 166.4, 137.6, 135.4, 134.3, 134.3, 133.8, 131.2, 129.4, 129.1, 129.0, 128.9, 127.8, 126.3, 66.9, 62.0, 59.0, 56.3, 29.1, 21.0, 13.9. HRMS (ESI)  $m/z$  calcd. for:  $\text{C}_{28}\text{H}_{26}\text{NaN}_2\text{O}_4[\text{M} + \text{Na}]^+$  477.1791, found: 477.1780. IR (KBr): 3243, 1734, 1690, 1630  $\text{cm}^{-1}$ . HRMS (ESI)  $m/z$  calcd. for:  $\text{C}_{28}\text{H}_{26}\text{NaN}_2\text{O}_4[\text{M} + \text{Na}]^+$  477.1791, found 477.1769.

**(1R\*, 4R\*, 5S\*)-ethyl**

**2,5-dibenzoyl-4-(4-methoxyphenyl)-2,3-diazabicyclo[3.1.0]hexane-1-carboxylate (4af)**

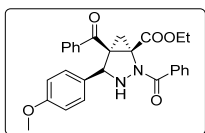

(85 mg, yield 90%). trans: yellow liquid.  $^1\text{H NMR}$  (600 MHz,  $\text{CDCl}_3$ )  $\delta$  7.91 (dd,  $J = 21.0, 7.5$  Hz, 2H), 7.78 (dd,  $J = 19.1, 10.9$  Hz, 2H), 7.61 (t,  $J = 7.4$  Hz, 1H), 7.54 – 7.47 (m, 3H), 7.43 (t,  $J = 7.6$  Hz, 2H), 6.97 (d,  $J = 8.6$  Hz, 1H), 6.74 (d,  $J = 8.7$  Hz, 2H), 5.22 (s, 1H), 4.03 – 3.95 (m, 2H), 3.74 (s, 3H), 2.74 (d,  $J = 6.3$  Hz, 1H), 1.92 (d,  $J = 6.3$  Hz, 1H), 1.01 (t,  $J = 7.1$  Hz, 3H). **cis**: white solid; mp 228-229  $^\circ\text{C}$ .  $^1\text{H NMR}$  (600 MHz, DMSO)  $\delta$  7.75 (d,  $J = 7.5$  Hz, 4H), 7.59 (t,  $J = 7.4$  Hz, 1H),

7.48 – 7.41 (m, 3H), 7.34 (t,  $J = 7.7$  Hz, 2H), 7.22 (d,  $J = 8.7$  Hz, 2H), 6.75 (d,  $J = 7.1$  Hz, 1H), 6.72 (d,  $J = 8.7$  Hz, 2H), 4.79 (d,  $J = 7.1$  Hz, 1H), 4.30 – 4.15 (m, 2H), 3.66 (s, 3H), 2.44 (d,  $J = 5.9$  Hz, 1H), 2.27 (d,  $J = 5.9$  Hz, 1H), 1.24 (t,  $J = 7.0$  Hz, 3H).  $^{13}\text{C}$  NMR (151 MHz, DMSO)  $\delta$  193.4, 167.5, 166.5, 159.1, 136.2, 134.5, 134.0, 131.3, 131.0, 129.7, 129.4, 129.2, 128.8, 128.0, 113.9, 65.7, 61.3, 60.2, 55.4, 52.2, 14.4. IR (KBr): 3245, 1733, 1688, 1630  $\text{cm}^{-1}$ . HRMS (ESI)  $m/z$  calcd. for:  $\text{C}_{28}\text{H}_{26}\text{NaN}_2\text{O}_5[\text{M} + \text{Na}]^+$  493.1730, found 493.1759.

**Ethyl (1S\*, 4S\*, 5R\*)-2,5-dibenzoyl-4-(3,4-dimethoxyphenyl)-2,3-diazabicyclo[3.1.0]hexane-1-carboxylate (4ag)**

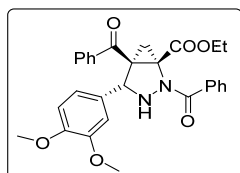

(83 mg, yield 83%), colorless liquid.  $^1\text{H}$  NMR (600 MHz,  $\text{CDCl}_3$ )  $\delta$  7.96 (t,  $J = 6.9$  Hz, 4H), 7.63 (dd,  $J = 10.6, 4.2$  Hz, 1H), 7.54 – 7.47 (m, 3H), 7.43 (dd,  $J = 10.5, 4.5$  Hz, 2H), 6.73 (d,  $J = 8.3$  Hz, 1H), 6.59 (d,  $J = 8.2$  Hz, 1H), 6.54 (s, 1H), 5.24 (s, 2H), 4.08 – 3.96 (m, 2H), 3.82 (s, 3H), 3.43 (s, 3H), 2.76 (d,  $J = 6.2$  Hz, 1H), 1.88 (d,  $J = 6.1$  Hz, 1H), 1.04 – 1.00 (m, 3H). **cis**: white solid; mp 234–236  $^\circ\text{C}$ .  $^1\text{H}$  NMR (600 MHz, DMSO)  $\delta$  7.76 – 7.73 (m, 4H), 7.60 (t,  $J = 7.4$  Hz, 1H), 7.48 – 7.41 (m, 3H), 7.34 (t,  $J = 7.7$  Hz, 2H), 7.17 (d,  $J = 8.0$  Hz, 2H), 6.97 (d,  $J = 7.9$  Hz, 2H), 6.75 (d,  $J = 7.0$  Hz, 1H), 4.79 (d,  $J = 7.0$  Hz, 2H), 4.30 – 4.11 (m, 1H), 2.44 (d,  $J = 5.9$  Hz, 1H), 2.26 (d,  $J = 5.9$  Hz, 3H), 1.24 (t,  $J = 7.0$  Hz, 3H).  $^{13}\text{C}$  NMR (151 MHz, DMSO)  $\delta$  193.5, 167.5, 166.6, 148.7, 148.6, 136.3, 134.5, 133.9, 131.4, 131.3, 129.6, 129.1, 128.8, 128.0, 120.5, 111.7, 111.4, 65.8, 61.4, 55.7, 55.7, 52.8, 52.1, 23.8, 14.4. IR (KBr): 3249, 1729, 1683, 1627  $\text{cm}^{-1}$ . HRMS (ESI)  $m/z$  calcd. for:  $\text{C}_{29}\text{H}_{28}\text{NaN}_2\text{O}_6[\text{M} + \text{Na}]^+$  523.1845, found, 523.1836.

**(1R\*, 4S\*, 5S\*)-ethyl 2,5-dibenzoyl-4-(4-chlorophenyl)-2,3-diazabicyclo[3.1.0]hexane-1-carboxylate (4ah)**

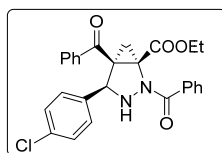

(79 mg, yield 83%), *trans*: yellow liquid.  $^1\text{H}$  NMR (600 MHz,  $\text{CDCl}_3$ )  $\delta$  7.94 (d,  $J = 7.3$  Hz, 2H), 7.85 (d,  $J = 7.3$  Hz, 2H), 7.63 (t,  $J = 7.2$  Hz, 1H), 7.51 (dd,  $J = 16.1, 8.3$  Hz, 3H), 7.43 (t,  $J = 7.5$  Hz, 2H), 7.17 (d,  $J = 8.4$  Hz, 2H), 6.94 (d,  $J = 8.2$  Hz, 2H), 5.21 (s, 1H), 4.06 – 3.93 (m, 2H), 2.75 (d,  $J = 6.2$  Hz, 1H), 1.80 (d,  $J = 6.2$  Hz, 1H), 0.99 (t,  $J = 7.1$  Hz, 3H). **cis**: white solid; mp 253–257  $^\circ\text{C}$ .  $^1\text{H}$  NMR (600 MHz, DMSO)  $\delta$  7.76 (t,  $J = 7.8$  Hz, 4H), 7.62 (t,  $J = 6.9$  Hz, 1H), 7.48 (t,  $J = 7.1$  Hz, 2H), 7.44 (t,  $J = 6.9$  Hz, 1H), 7.35 (t,  $J = 7.2$  Hz, 2H), 7.32 (d,  $J = 7.6$  Hz, 2H), 7.26 (d,  $J = 7.4$  Hz, 2H), 6.84 (d,  $J = 5.7$  Hz, 1H), 4.92 (d,  $J = 6.0$  Hz, 1H), 4.30–4.18 (m, 2H), 2.29 (d,  $J = 5.0$  Hz, 1H), 1.25 (t,  $J = 6.0$  Hz, 3H).  $^{13}\text{C}$  NMR (151 MHz,  $\text{CDCl}_3$ )  $\delta$  194.4, 170.3, 166.3, 136.1, 135.2, 134.2, 134.0, 133.7, 131.3, 129.1, 129.0, 128.9, 128.8, 128.6, 127.9, 127.8, 66.5, 62.1, 59.4, 56.5, 30.1, 13.8. IR (KBr): 3246, 1733, 1685, 1627  $\text{cm}^{-1}$ . HRMS (ESI)  $m/z$  calcd. for:  $\text{C}_{27}\text{H}_{23}\text{ClNaN}_2\text{O}_4[\text{M} + \text{Na}]^+$  497.1244, found 497.1239.

**(1R\*, 4S\*, 5S\*)-ethyl 2,5-dibenzoyl-4-(2-bromophenyl)-2,3-diazabicyclo[3.1.0]hexane-1-carboxylate (4ai)**

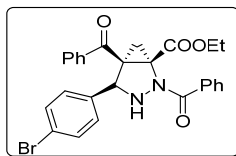

(90 mg, yield 87%), trans: yellow solid; mp 179-180 °C. <sup>1</sup>H NMR (600 MHz, CDCl<sub>3</sub>) δ 7.89 (d, *J* = 7.5 Hz, 2H), 7.79 (d, *J* = 8.4 Hz, 2H), 7.65 (d, *J* = 8.4 Hz, 2H), 7.51 (t, *J* = 7.2 Hz, 1H), 7.44 (t, *J* = 7.5 Hz, 2H), 7.25 – 7.21 (m, 3H), 7.02 (d, *J* = 3.8 Hz, 2H), 5.24 (s, 1H), 4.04 (dd, *J* = 14.1, 7.0 Hz, 2H), 2.71 (d, *J* = 6.3 Hz, 1H), 1.92 (d, *J* = 6.3 Hz, 1H), 1.05 (t, *J* = 7.1 Hz, 3H). cis: white solid; mp 197-200 °C. <sup>1</sup>H NMR (600 MHz, DMSO) δ 7.75 (dd, *J* = 12.2, 7.4 Hz, 4H), 7.62 (t, *J* = 7.4 Hz, 1H), 7.47 (t, *J* = 7.8 Hz, 2H), 7.43 (t, *J* = 7.4 Hz, 1H), 7.35 (t, *J* = 7.7 Hz, 2H), 7.31 (d, *J* = 8.5 Hz, 2H), 7.25 (d, *J* = 8.5 Hz, 2H), 6.82 (d, *J* = 6.7 Hz, 1H), 4.91 (d, *J* = 6.7 Hz, 1H), 4.34 – 4.05 (m, 2H), 2.49 (d, *J* = 6.2 Hz, 1H), 2.29 (d, *J* = 6.0 Hz, 1H), 1.24 (t, *J* = 7.0 Hz, 3H). <sup>13</sup>C NMR (151 MHz, CDCl<sub>3</sub>) δ 194.0, 170.0, 166.3, 137.1, 134.1, 132.3, 131.3, 130.5, 129.2, 129.1, 128.8, 128.0, 127.9, 126.3, 67.0, 62.2, 59.0, 55.9, 29.0, 13.9. IR (KBr): 3260, 1734, 1689, 1632 cm<sup>-1</sup>. HRMS (ESI) *m/z* calcd. for: C<sub>27</sub>H<sub>23</sub>BrNaN<sub>2</sub>O<sub>4</sub> [M + Na]<sup>+</sup> 541.0739, found 541.0735.

**(1R\*, 4S\*, 5R\*)-2,5-dibenzoyl-4-(furan-2-yl)-2,3-diazabicyclo[3.1.0]hexane-1-carboxylate (4aj)**

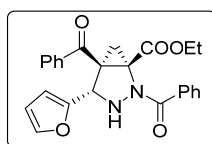

(73 mg, yield 85%), trans: Colorless liquid. <sup>1</sup>H NMR (600 MHz, CDCl<sub>3</sub>) δ 7.99 (d, *J* = 7.4 Hz, 2H), 7.86 (d, *J* = 7.3 Hz, 2H), 7.61 (t, *J* = 7.4 Hz, 1H), 7.51 – 7.46 (m, 3H), 7.41 (dd, *J* = 13.6, 6.1 Hz, 3H), 6.20 (dd, *J* = 3.1, 1.8 Hz, 1H), 5.83 (d, *J* = 2.8 Hz, 1H), 5.12 (d, *J* = 7.2 Hz, 1H), 4.18 – 4.04 (m, 2H), 2.75 (d, *J* = 6.4 Hz, 1H), 2.04 (d, *J* = 6.7 Hz, 1H), 1.10 (t, *J* = 7.1 Hz, 3H). cis: white solid; mp 217-220 °C. <sup>1</sup>H NMR (600 MHz, DMSO) δ 7.84 (d, *J* = 7.4 Hz, 2H), 7.68 (d, *J* = 7.4 Hz, 2H), 7.60 (t, *J* = 7.4 Hz, 1H), 7.47 (t, *J* = 7.7 Hz, 2H), 7.44 (t, *J* = 7.4 Hz, 1H), 7.40 (d, *J* = 0.9 Hz, 1H), 7.35 (t, *J* = 7.7 Hz, 2H), 6.76 (d, *J* = 7.2 Hz, 1H), 6.42 (d, *J* = 3.2 Hz, 1H), 6.35 – 6.26 (m, 1H), 5.01 (d, *J* = 7.4 Hz, 1H), 4.30 – 4.13 (m, 2H), 2.47 (d, *J* = 6.1 Hz, 1H), 2.31 (d, *J* = 6.0 Hz, 1H), 1.22 (t, *J* = 7.1 Hz, 3H). <sup>13</sup>C NMR (151 MHz, DMSO) δ 193.6, 167.9, 166.3, 150.9, 142.9, 136.2, 134.6, 133.9, 131.2, 129.6, 129.1, 128.8, 127.9, 111.1, 109.2, 61.4, 60.2, 55.3, 52.6, 51.4, 14.3. IR (KBr): 3252, 1741, 1716, 1650 cm<sup>-1</sup>. HRMS (ESI) *m/z* calcd. for: C<sub>25</sub>H<sub>22</sub>NaN<sub>2</sub>O<sub>5</sub> [M + Na]<sup>+</sup> 453.1427, found, 453.1437.

**(1R\*, 4S\*, 5S\*)-ethyl 2,5-dibenzoyl-4-((E)-styryl)-2,3-diazabicyclo[3.1.0]hexane-1-carboxylate (4ak)**

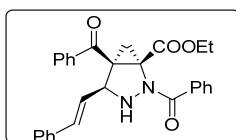

(70 mg, yield 74%), trans: yellow liquid. <sup>1</sup>H NMR (600 MHz, CDCl<sub>3</sub>) δ 7.99 (d, *J* = 7.9 Hz, 2H), 7.88 (d, *J* = 7.7 Hz, 2H), 7.64 (dd, *J* = 10.6, 4.0 Hz, 1H), 7.56 – 7.49 (m, 4H), 7.44 (t, *J* = 7.6 Hz, 2H), 7.28 (dd, *J* = 8.7, 5.5 Hz, 2H), 7.24 (d, *J* = 7.0 Hz, 1H), 7.13 (d, *J* = 7.8 Hz, 2H), 6.26 (d, *J* = 15.8 Hz, 1H), 5.97 (dd, *J* = 15.8, 4.5 Hz, 1H), 4.71 (d, *J* = 3.9 Hz, 1H), 4.08 (q, *J* = 7.0 Hz, 2H), 2.78 (d, *J* = 6.1 Hz, 1H), 2.29 (d, *J* = 6.1 Hz, 1H), 1.08 (t, *J* = 7.1 Hz, 3H). cis: white solid, mp

182-185 °C. <sup>1</sup>H NMR (600 MHz, DMSO) δ 7.97 (d, *J* = 7.7 Hz, 2H), 7.84 (d, *J* = 7.8 Hz, 2H), 7.65 (t, *J* = 7.4 Hz, 1H), 7.53 (t, *J* = 7.7 Hz, 2H), 7.48 (t, *J* = 7.3 Hz, 1H), 7.42 (t, *J* = 7.6 Hz, 2H), 7.24 (t, *J* = 7.4 Hz, 2H), 7.20 (t, *J* = 7.2 Hz, 1H), 7.08 (d, *J* = 7.8 Hz, 2H), 7.05 (d, *J* = 8.4 Hz, 1H), 6.46 (d, *J* = 15.9 Hz, 1H), 6.08 – 5.98 (m, 1H), 4.43 (t, *J* = 8.9 Hz, 1H), 4.15 – 4.09 (m, 2H), 2.43 (d, *J* = 5.4 Hz, 1H), 2.30 (d, *J* = 5.2 Hz, 1H), 1.13 (t, *J* = 7.1 Hz, 3H). <sup>13</sup>C NMR (151 MHz, DMSO) δ 192.9, 168.8, 167.2, 136.2, 136.0, 134.8, 134.6, 134.4, 131.3, 129.6, 129.4, 129.1, 128.6, 128.1, 128.0, 126.7, 126.6, 124.2, 67.5, 61.4, 60.2, 54.4, 54.4, 21.2, 14.3. IR (KBr): 3240, 1720, 1676, 1630 cm<sup>-1</sup>. HRMS (ESI) *m/z* calcd. for: C<sub>29</sub>H<sub>26</sub>NaN<sub>2</sub>O<sub>4</sub> [M + Na]<sup>+</sup> 489.1791, found, 489.1779.

**Ethyl 4-benzoyl-5-phenyl-1H-pyrrole-2-carboxylate (5aa)**

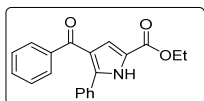

White solid (53 mg, yield 82%), mp 182-186 °C. <sup>1</sup>H NMR (400 MHz, CDCl<sub>3</sub>) δ 9.89 (s, 1H), 7.83 – 7.75 (m, 2H), 7.52 (dt, *J* = 5.5, 3.3 Hz, 2H), 7.47 (d, *J* = 7.4 Hz, 1H), 7.37 (dd, *J* = 10.4, 4.7 Hz, 2H), 7.34 – 7.31 (m, 3H), 7.22 (d, *J* = 2.6 Hz, 1H), 4.27 (q, *J* = 7.1 Hz, 2H), 1.32 (t, *J* = 7.1 Hz, 3H). <sup>13</sup>C NMR (101 MHz, CDCl<sub>3</sub>) δ 191.7, 161.1, 140.6, 138.9, 132.1, 130.8, 129.6, 129.0, 128.7, 128.5, 128.1, 122.3, 121.9, 119.3, 61.0, 14.4. IR (KBr) 3279, 1682, 1657 cm<sup>-1</sup>. HRMS (ESI) *m/z* calcd. for: C<sub>20</sub>H<sub>17</sub>NaNO<sub>3</sub> [M + Na]<sup>+</sup> 342.1106, found, 342.1118.

**Ethyl 4-(4-methylbenzoyl)-5-phenyl-1H-pyrrole-2-carboxylate (5ba)**

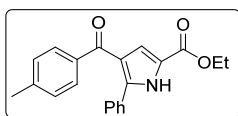

White solid (58 mg, yield 80%); mp 142-145 °C. <sup>1</sup>H NMR (400 MHz, CDCl<sub>3</sub>) δ 10.36 (s, 1H), 7.72 (d, *J* = 8.1 Hz, 2H), 7.61 – 7.42 (m, 2H), 7.36 – 7.25 (m, 3H), 7.19 (d, *J* = 2.7 Hz, 2H), 7.16 (s, 1H), 4.19 (q, *J* = 7.1 Hz, 2H), 2.37 (s, 3H), 1.27 (t, *J* = 7.1 Hz, 3H). <sup>13</sup>C NMR (101 MHz, CDCl<sub>3</sub>) δ 191.5, 161.4, 142.8, 140.6, 136.3, 130.9, 129.9, 128.8, 128.7, 128.3, 122.1, 122.1, 119.4, 61.0, 21.6, 14.4. IR (KBr) 3308, 1688, 1642 cm<sup>-1</sup>. HRMS (ESI) *m/z* calcd. for: C<sub>21</sub>H<sub>19</sub>NaNO<sub>3</sub> [M + Na]<sup>+</sup> 356.1263, found, 356.1270

**Ethyl 4-(4-methoxybenzoyl)-5-phenyl-1H-pyrrole-2-carboxylate (5ca)**

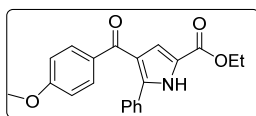

White solid (60 mg, yield 86%); mp 161-163 °C. <sup>1</sup>H NMR (400 MHz, CDCl<sub>3</sub>) δ 10.25 (s, 1H), 7.84 – 7.76 (m, 2H), 7.55 – 7.48 (m, 2H), 7.33 – 7.28 (m, 3H), 7.20 (d, *J* = 2.6 Hz, 1H), 6.86 (d, *J* = 8.8 Hz, 2H), 4.24 (q, *J* = 7.1 Hz, 2H), 3.83 (s, 3H), 1.30 (t, *J* = 7.1 Hz, 3H). <sup>13</sup>C NMR (101 MHz, CDCl<sub>3</sub>) δ 190.6, 163.0, 161.4, 140.1, 132.1, 131.5, 130.9, 130.1, 128.7, 128.7, 128.4, 122.2, 122.1, 119.2, 113.4, 61.0, 55.4, 14.4. IR (KBr) 3297, 1688, 1631 cm<sup>-1</sup>. HRMS (ESI) *m/z* calcd. for: C<sub>21</sub>H<sub>19</sub>NaNO<sub>4</sub> [M + Na]<sup>+</sup> 372.1212, found, 372.1120.

**Ethyl 4-(4-chlorobenzoyl)-5-phenyl-1H-pyrrole-2-carboxylate (5da)**

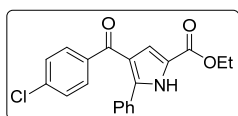

White solid (50 mg, yield 71%); mp 142-145 °C. <sup>1</sup>H NMR (400 MHz, CDCl<sub>3</sub>) δ 10.28 (s, 1H), 7.72 (d, *J* = 8.5 Hz, 2H), 7.50 (dd, *J* = 6.5, 3.1 Hz, 2H), 7.36 – 7.30 (m, 5H), 7.18 (d, *J* = 2.6 Hz,

1H), 4.21 (q,  $J = 7.1$  Hz, 2H), 1.29 (t,  $J = 7.1$  Hz, 3H).  $^{13}\text{C}$  NMR(101 MHz,  $\text{CDCl}_3$ )  $\delta$  190.4, 161.2, 140.8, 138.4, 137.2, 131.0, 130.6, 129.0, 128.9, 128.4, 128.4, 122.5, 121.6, 119.1, 61.1, 14.3. IR (KBr) 3267, 1687, 1648  $\text{cm}^{-1}$ . HRMS (ESI)  $m/z$  calcd.for:  $\text{C}_{20}\text{H}_{16}\text{NaClNO}_3$   $[\text{M} + \text{Na}]^+$  376.0717, found, 376.0730.

**Ethyl 4-(4-bromobenzoyl)-5-phenyl-1H-pyrrole-2-carboxylate (5ea)**

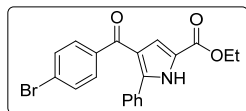

White solid (50 mg, yield 63%); mp 129-130  $^{\circ}\text{C}$ .  $^1\text{H}$  NMR (400 MHz,  $\text{CDCl}_3$ )  $\delta$  10.15 (s, 1H), 7.75 – 7.67 (m, 2H), 7.50 (dd,  $J = 6.5, 3.1$  Hz, 2H), 7.33 (dd,  $J = 5.3, 3.1$  Hz, 5H), 7.19 (d,  $J = 2.6$  Hz, 1H), 4.24 (q,  $J = 7.1$  Hz, 2H), 1.31 (t,  $J = 7.1$  Hz, 3H).  $^{13}\text{C}$  NMR (101 MHz,  $\text{CDCl}_3$ )  $\delta$  190.4, 161.2, 140.8, 138.4, 137.2, 131.0, 130.6, 129.1, 128.8, 128.5, 128.4, 122.4, 121.6, 119.1, 61.1, 14.4. IR (KBr) 3274, 1687, 1652  $\text{cm}^{-1}$ . HRMS (ESI)  $m/z$  calcd.for:  $\text{C}_{20}\text{H}_{16}\text{NaBrNO}_3$   $[\text{M} + \text{Na}]^+$  420.0212, found, 420.0216.

**Ethyl 4-([1, 1'-biphenyl]-3-carbonyl)-5-phenyl-1H-pyrrole-2-carboxylate (5fa)**

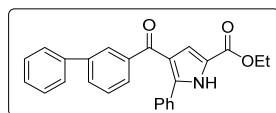

White solid (66 mg, yield 83%); mp 126-128  $^{\circ}\text{C}$ .  $^1\text{H}$  NMR (400 MHz,  $\text{CDCl}_3$ )  $\delta$  10.37 (s, 1H), 7.88 (d,  $J = 8.2$  Hz, 2H), 7.62 – 7.57 (m, 4H), 7.55 (dd,  $J = 6.5, 2.7$  Hz, 2H), 7.45 (t,  $J = 7.5$  Hz, 2H), 7.38 (d,  $J = 7.3$  Hz, 1H), 7.33 (dd,  $J = 11.1, 7.1$  Hz, 3H), 7.27 (d,  $J = 1.7$  Hz, 1H), 4.30 – 4.21 (m, 2H), 1.31 (td,  $J = 7.1, 1.8$  Hz, 3H).  $^{13}\text{C}$  NMR (101 MHz,  $\text{CDCl}_3$ )  $\delta$  191.3, 161.5, 144.9, 140.9, 140.1, 137.6, 133.6, 130.8, 130.3, 130.2, 128.9, 128.9, 128.5, 128.4, 128.1, 127.3, 126.8, 122.3, 122.0, 119.5, 61.1, 14.4. IR (KBr) 3261, 1681, 1639  $\text{cm}^{-1}$ . HRMS (ESI)  $m/z$  calcd.for:  $\text{C}_{26}\text{H}_{21}\text{NaNO}_3$   $[\text{M} + \text{Na}]^+$  418.1410, found, 418.1425.

**Ethyl 4-(2-bromobenzoyl)-5-phenyl-1H-pyrrole-2-carboxylate (5ga)**

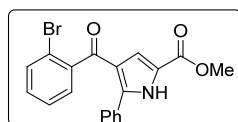

White solid (56 mg, yield 71%); mp 122 -125  $^{\circ}\text{C}$ .  $^1\text{H}$  NMR (400 MHz,  $\text{CDCl}_3$ )  $\delta$  10.39 (s, 1H), 7.54 (dd,  $J = 6.5, 3.1$  Hz, 2H), 7.47 (dd,  $J = 7.9, 0.7$  Hz, 1H), 7.31 – 7.27 (m, 3H), 7.22 (td,  $J = 7.4, 1.1$  Hz, 1H), 7.17 (td,  $J = 7.6, 1.9$  Hz, 1H), 7.07 (d,  $J = 2.6$  Hz, 1H), 4.11 (q,  $J = 7.1$  Hz, 2H), 1.23 (t,  $J = 7.1$  Hz, 3H).  $^{13}\text{C}$  NMR (101 MHz,  $\text{CDCl}_3$ )  $\delta$  190.7, 161.2, 141.8, 133.1, 130.8, 130.5, 129.2, 129.1, 128.1, 126.9, 122.7, 122.0, 119.6, 119.4, 61.1, 14.3. IR (KBr): 3240, 1683, 1652  $\text{cm}^{-1}$ . HRMS (ESI)  $m/z$  calcd.for:  $\text{C}_{20}\text{H}_{16}\text{NaBrNO}_3$   $[\text{M} + \text{Na}]^+$  420.0212, found, 420.0198.

**Ethyl 5-phenyl-4-(thiophene-2-carbonyl)-1H-pyrrole-2-carboxylate (5ha)**

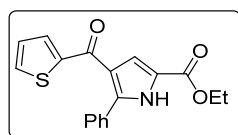

White solid (41 mg, yields 62%); mp 155-158  $^{\circ}\text{C}$ .  $^1\text{H}$  NMR (400 MHz,  $\text{CDCl}_3$ )  $\delta$  10.27 (s, 1H), 7.61 (ddd,  $J = 13.9, 6.7, 2.3$  Hz, 4H), 7.35 (dd,  $J = 4.7, 2.1$  Hz, 4H), 7.06 (dd,  $J = 4.8, 3.9$  Hz, 1H), 4.24 (q,  $J = 7.1$  Hz, 2H), 1.31 (t,  $J = 7.1$  Hz, 4H).  $^{13}\text{C}$  NMR (101 MHz,  $\text{CDCl}_3$ )  $\delta$  183.1, 161.3,

145.2, 140.2, 133.8, 133.4, 130.7, 130.2, 128.9, 128.8, 128.5, 127.8, 122.3, 121.8, 118.6, 61.1, 14.4. IR (KBr): 3272, 1683, 1622  $\text{cm}^{-1}$ . HRMS (ESI)  $m/z$  calcd. for:  $\text{C}_{18}\text{H}_{15}\text{NaNO}_3$   $[\text{M} + \text{Na}]^+$  348.0671, found, 348.0660.

**Methyl 4-benzoyl-5-phenyl-1H-pyrrole-2-carboxylate (5ia)**

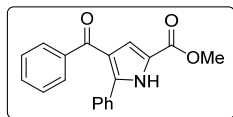

White solid (50 mg, yield 82%); mp 133-136  $^{\circ}\text{C}$ .  $^1\text{H}$  NMR (400 MHz,  $\text{CDCl}_3$ )  $\delta$  10.23 (s, 1H), 7.81 – 7.75 (m, 2H), 7.54 – 7.50 (m, 2H), 7.47 (t,  $J = 7.4$  Hz, 1H), 7.36 (t,  $J = 7.6$  Hz, 2H), 7.32 – 7.30 (m, 3H), 7.21 (d,  $J = 2.6$  Hz, 1H), 3.77 (s, 3H).  $^{13}\text{C}$  NMR (101 MHz,  $\text{CDCl}_3$ )  $\delta$  191.7, 161.7, 140.9, 138.9, 132.2, 130.7, 129.6, 19.0, 128.8, 128.4, 128.1, 121.9, 119.7, 77.4, 77.1, 76.8, 52.0. IR (KBr): 3269, 1684, 1627  $\text{cm}^{-1}$ . HRMS (ESI)  $m/z$  calcd. for:  $\text{C}_{19}\text{H}_{15}\text{NaNO}_3$   $[\text{M} + \text{Na}]^+$  328.0950, found, 328.0960.

**Ethyl 4-benzoyl-5-ethyl-1H-pyrrole-2-carboxylate (5ab)**

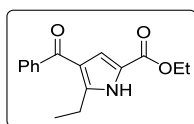

White solid (36 mg, yield 63%); mp 151 -154  $^{\circ}\text{C}$ .  $^1\text{H}$  NMR (400 MHz,  $\text{CDCl}_3$ )  $\delta$  10.40 (s, 1H), 7.86 – 7.69 (m, 1H), 7.54 (d,  $J = 7.3$  Hz, 1H), 7.47 (t,  $J = 7.3$  Hz, 2H), 7.10 (d,  $J = 2.4$  Hz, 1H), 4.34 (q,  $J = 7.1$  Hz, 2H), 3.10 (q,  $J = 7.5$  Hz, 2H), 1.35 (dd,  $J = 13.8, 7.3$  Hz, 6H).  $^{13}\text{C}$  NMR (101 MHz,  $\text{CDCl}_3$ )  $\delta$  191.9, 161.7, 147.0, 139.9, 131.6, 129.1, 128.2, 120.6, 120.3, 119.3, 60.9, 21.1, 13.3. IR (KBr): 3279, 1687, 1657  $\text{cm}^{-1}$ . HRMS (ESI)  $m/z$  calcd. for:  $\text{C}_{16}\text{H}_{17}\text{NaNO}_3$   $[\text{M} + \text{Na}]^+$  294.1106, found, 294.1110.

**Ethyl 4-benzoyl-5-propyl-1H-pyrrole-2-carboxylate (5ac)**

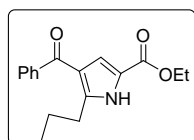

White solid (36 mg, yield 65%); mp 145-147  $^{\circ}\text{C}$ ;  $^1\text{H}$  NMR (400 MHz,  $\text{CDCl}_3$ )  $\delta$  10.64 (s, 1H), 7.86 – 7.77 (m, 2H), 7.57 (ddd,  $J = 11.1, 9.7, 6.3$  Hz, 1H), 7.47 (t,  $J = 7.3$  Hz, 3H), 7.11 (d,  $J = 2.4$  Hz, 1H), 4.35 (q,  $J = 7.1$  Hz, 2H), 3.10 – 2.95 (m, 2H), 1.83 – 1.69 (m, 2H), 1.41 – 1.32 (m, 3H), 0.98 (t,  $J = 7.4$  Hz, 3H).  $^{13}\text{C}$  NMR (101 MHz,  $\text{CDCl}_3$ )  $\delta$  192.0, 161.8, 145.9, 139.9, 133.6, 131.6, 130.2, 129.1, 128.5, 128.2, 121.0, 120.3, 119.3, 60.9, 29.5, 22.6, 14.4, 13.9. IR (KBr): 3271, 1693, 1652  $\text{cm}^{-1}$ . HRMS (ESI)  $m/z$  calcd. for:  $\text{C}_{17}\text{H}_{19}\text{NaNO}_3$   $[\text{M} + \text{Na}]^+$  308.1263, found, 308.1260

**Ethyl 4-benzoyl-5-(p-tolyl)-1H-pyrrole-2-carboxylate (5ae)**

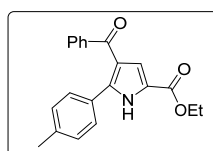

White solid (50 mg, 75%); mp 154-158  $^{\circ}\text{C}$ ;  $^1\text{H}$  NMR (400 MHz,  $\text{CDCl}_3$ )  $\delta$  10.26 (d,  $J = 67.0$  Hz, 1H), 7.73 – 7.68 (m, 2H), 7.39 (t,  $J = 7.4$  Hz, 1H), 7.33 (d,  $J = 8.1$  Hz, 2H), 7.28 (t,  $J = 7.6$  Hz, 2H), 7.09 (t,  $J = 5.3$  Hz, 1H), 7.02 (d,  $J = 7.9$  Hz, 2H), 4.12 (q,  $J = 7.1$  Hz, 2H), 2.23 (s, 3H), 1.19 (t,  $J = 7.1$  Hz, 3H).  $^{13}\text{C}$  NMR (101 MHz,  $\text{CDCl}_3$ )  $\delta$  191.7, 161.4, 141.1, 139.1, 138.9, 132.0, 129.7,

129.0, 128.7, 128.1, 127.9, 122.0, 121.6, 119.5, 61.0, 21.3, 14.4. IR (KBr): 3276, 1711, 1670, 1648  $\text{cm}^{-1}$ . HRMS (ESI)  $m/z$  calcd.for:  $\text{C}_{21}\text{H}_{19}\text{NaNO}_3[\text{M} + \text{Na}]^+$  356.1263, found, 356.1252.

**Ethyl 4-benzoyl-5-(4-methoxyphenyl)-1H-pyrrole-2-carboxylate (5af)**

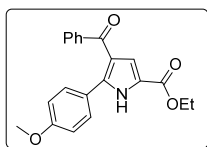

White solid (53 mg, yield 76%); mp 121-122  $^{\circ}\text{C}$ ;  $^1\text{H}$  NMR (400 MHz,  $\text{CDCl}_3$ )  $\delta$  10.44 (s, 1H), 7.81 (d,  $J = 8.6$  Hz, 2H), 7.51 (d,  $J = 3.6$  Hz, 2H), 7.29 (d,  $J = 3.3$  Hz, 3H), 7.19 (d,  $J = 2.0$  Hz, 1H), 6.85 (d,  $J = 8.6$  Hz, 2H), 4.19 (q,  $J = 7.1$  Hz, 2H), 3.82 (s, 3H), 1.27 (t,  $J = 7.1$  Hz, 3H).  $^{13}\text{C}$  NMR (101 MHz,  $\text{CDCl}_3$ )  $\delta$  190.6, 163.0, 161.4, 140.2, 132.1, 131.5, 130.9, 128.8, 128.7, 128.3, 122.2, 122.2, 119.1, 113.4, 77.5, 77.1, 76.8, 61.0, 55.4, 14.4. IR (KBr): 3140, 1704, 1626, 1566  $\text{cm}^{-1}$ . HRMS (ESI)  $m/z$  calcd.for:  $\text{C}_{21}\text{H}_{19}\text{NaNO}_4[\text{M} + \text{Na}]^+$  372.1212, found, 372.1202.

**Ethyl 4-benzoyl-5-(3,4-dimethoxyphenyl)-1H-pyrrole-2-carboxylate (5ag)**

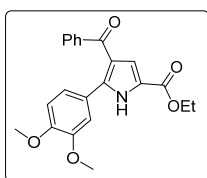

Yellow liquid (48 mg, yield 63%);  $^1\text{H}$  NMR (400 MHz,  $\text{CDCl}_3$ )  $\delta$  10.12 (s, 1H), 7.80 – 7.70 (m, 1H), 7.49 – 7.44 (m, 1H), 7.36 (t,  $J = 7.6$  Hz, 1H), 7.20 (t,  $J = 8.0$  Hz, 1H), 7.15 – 7.02 (m, 1H), 6.81 (d,  $J = 8.3$  Hz, 1H), 4.24 (q,  $J = 7.1$  Hz, 1H), 3.86 (s, 2H), 3.79 (s, 1H), 1.30 (t,  $J = 7.1$  Hz, 1H).  $^{13}\text{C}$  NMR (101 MHz,  $\text{CDCl}_3$ )  $\delta$  191.8, 161.3, 149.7, 148.6, 140.7, 139.1, 132.1, 129.6, 128.1, 123.5, 121.9, 121.5, 121.3, 119.6, 112.5, 110.9, 61.0, 55.9, 55.9, 14.4. IR (KBr): 3269, 1673, 1621  $\text{cm}^{-1}$ . HRMS (ESI)  $m/z$  calcd.for:  $\text{C}_{22}\text{H}_{22}\text{NO}_5[\text{M} + \text{H}]^+$  380.1500, found, 380.1520.

**Ethyl 4-benzoyl-5-(furan-2-yl)-1H-pyrrole-2-carboxylate (5aj)**

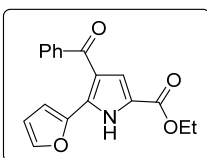

White solid (40 mg, yield 65%); mp 154-157  $^{\circ}\text{C}$ .  $^1\text{H}$  NMR (400 MHz,  $\text{CDCl}_3$ )  $\delta$  9.79 (s, 1H), 7.77 – 7.71 (m, 2H), 7.60 (d,  $J = 3.2$  Hz, 1H), 7.55 – 7.44 (m, 1H), 7.40 (dd,  $J = 12.8, 4.5$  Hz, 3H), 7.05 (d,  $J = 2.7$  Hz, 1H), 6.45 (dd,  $J = 3.5, 1.8$  Hz, 1H), 4.28 (q,  $J = 7.1$  Hz, 2H), 1.29 (t,  $J = 7.1$  Hz, 3H).  $^{13}\text{C}$  NMR (101 MHz,  $\text{CDCl}_3$ )  $\delta$  190.9, 160.7, 145.2, 143.0, 139.6, 131.9, 130.8, 130.2, 129.3, 128.3, 121.6, 120.2, 119.8, 113.1, 112.5, 61.0, 14.4. IR (KBr): 3289, 1690, 1637  $\text{cm}^{-1}$ . HRMS (ESI)  $m/z$  calcd.for:  $\text{C}_{18}\text{H}_{15}\text{NaNO}_4[\text{M} + \text{Na}]^+$  332.0899, found, 332.0890.

**Ethyl (E)-4-benzoyl-5-styryl-1H-pyrrole-2-carboxylate (5ak)**

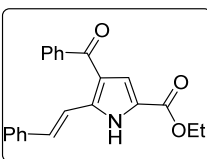

Yellow liquid (34 mg, yield 49%);  $^1\text{H}$  NMR (400 MHz,  $\text{CDCl}_3$ )  $\delta$  10.38 (s, 1H), 7.84 (d,  $J = 7.3$  Hz, 1H), 7.78 (d,  $J = 16.9$  Hz, 1H), 7.52 (dt,  $J = 17.0, 7.3$  Hz, 3H), 7.35 (t,  $J = 7.3$  Hz, 1H), 7.31 – 7.23 (m, 1H), 7.14 (d,  $J = 2.3$  Hz, 1H), 4.40 – 4.30 (m, 1H), 1.33 (t,  $J = 7.1$  Hz, 2H).  $^{13}\text{C}$  NMR

(101 MHz, CDCl<sub>3</sub>) δ 191.96, 161.4, 139.7, 139.3, 136.3, 132.0, 130.2, 129.3, 128.8, 128.3, 127.0, 122.5, 122.2, 119.6, 117.2, 61.3, 14.4. IR (KBr): 3278, 1687, 1635 cm<sup>-1</sup>. HRMS (ESI) m/z calcd.for: C<sub>22</sub>H<sub>19</sub>NaNO<sub>3</sub> [M + Na]<sup>+</sup> 368.1263, found, 368.1244.

### (3) Copies of <sup>1</sup>H and <sup>13</sup>C NMR spectra of products

#### 1. 3aa

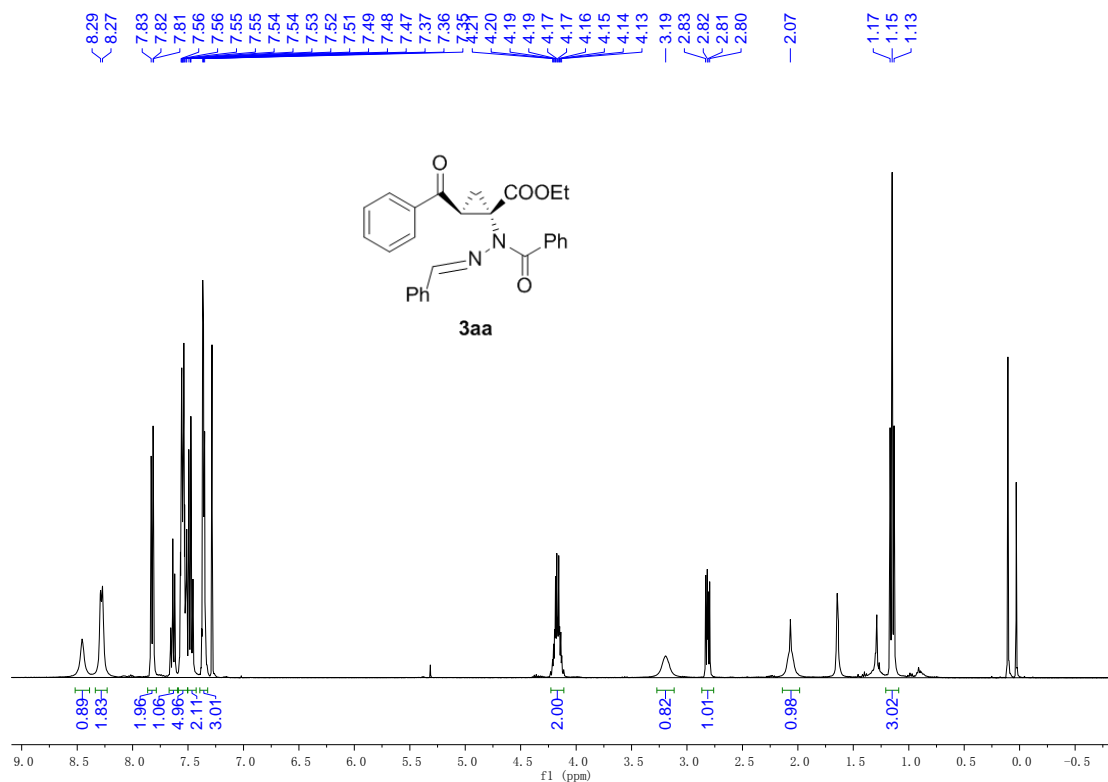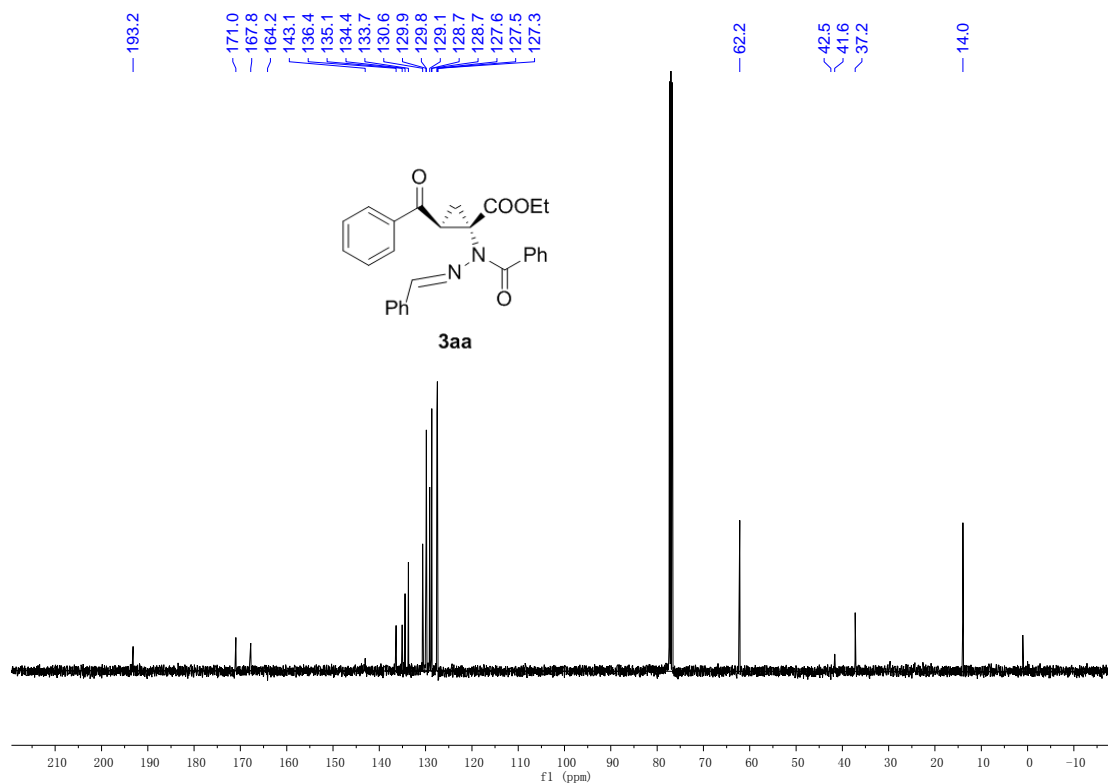



## 2. 3ac

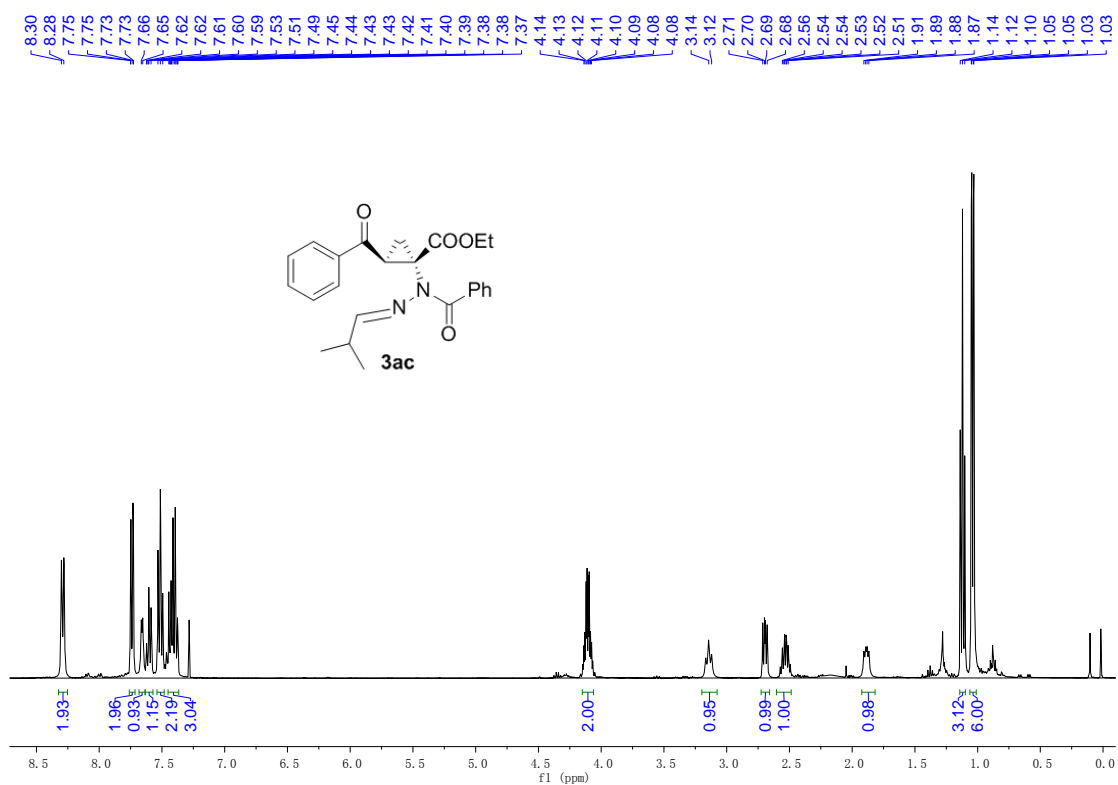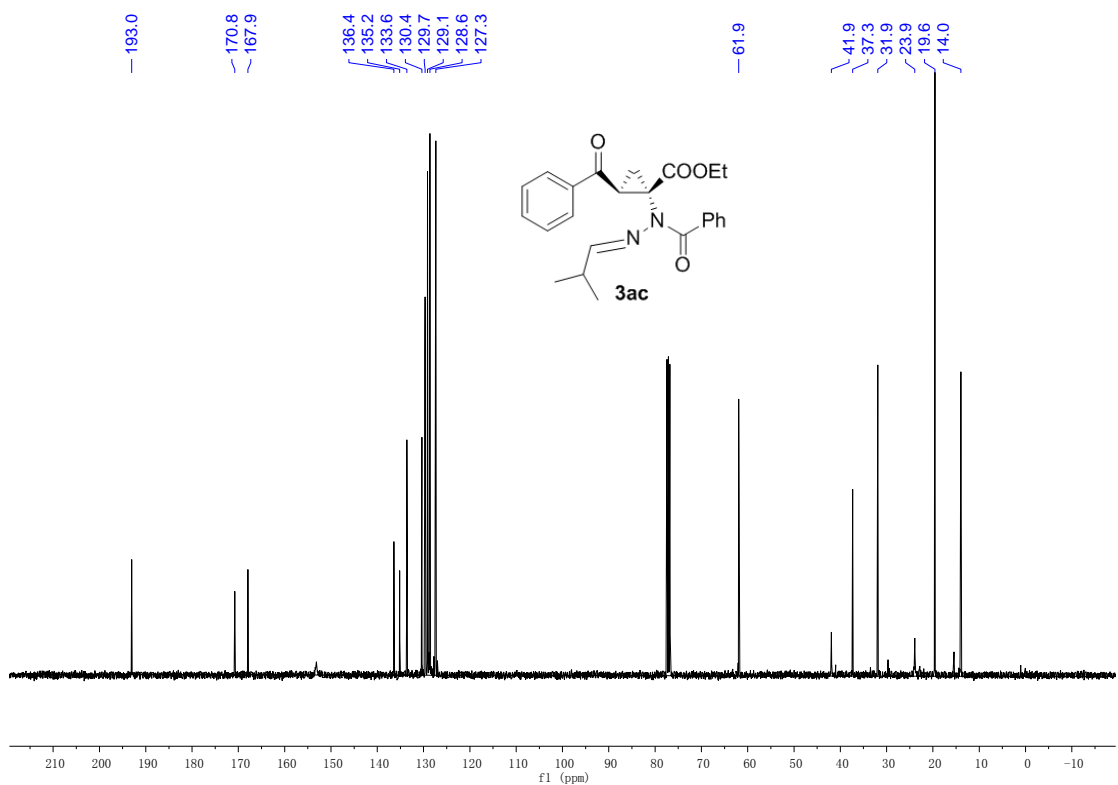

## 3. 3af

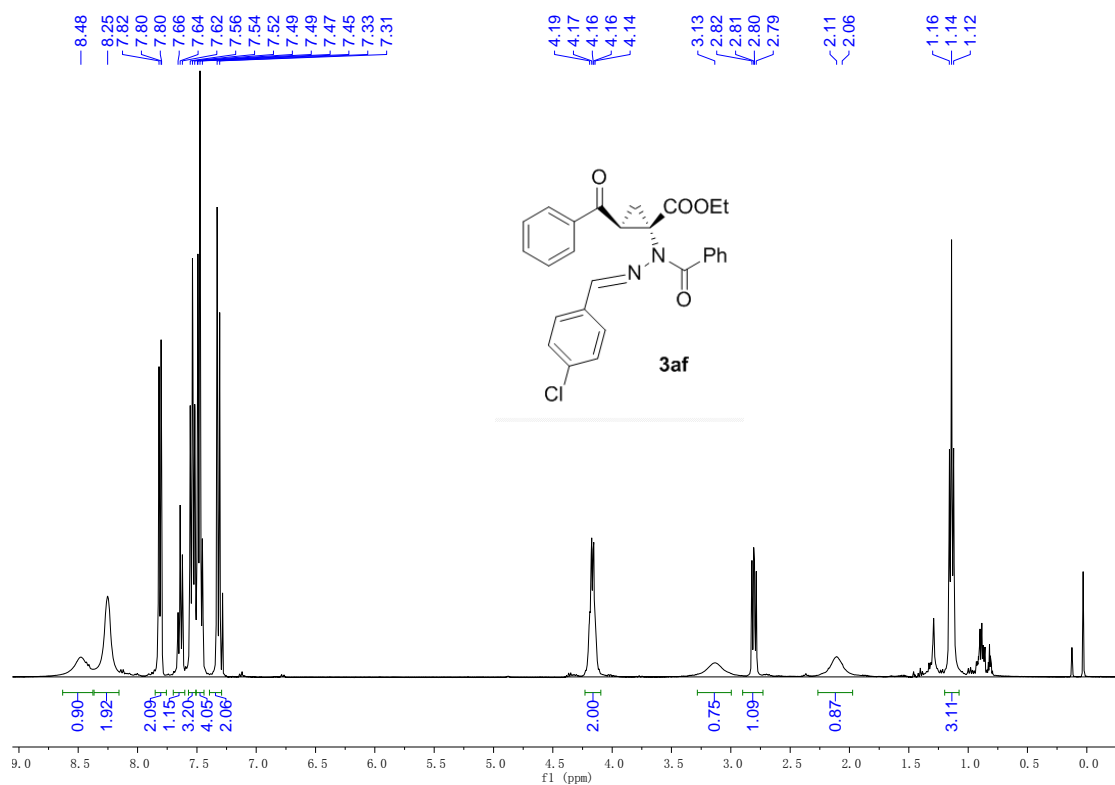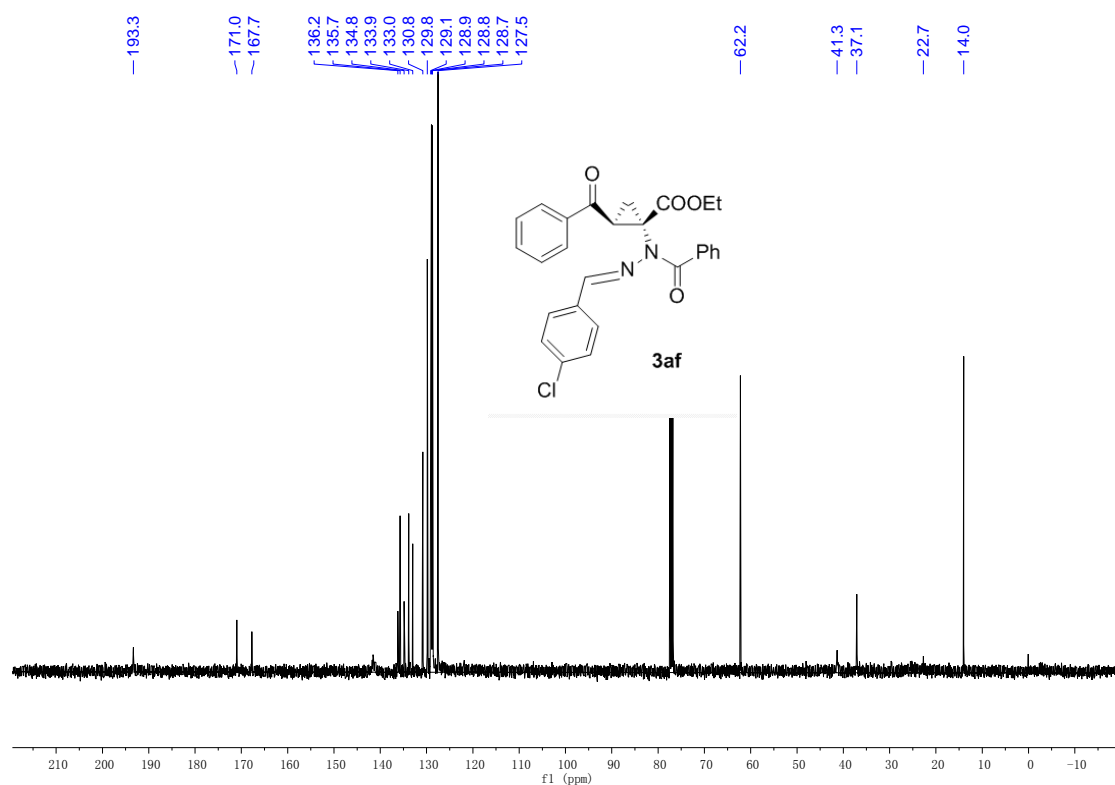

<sup>1</sup>H NMR and <sup>13</sup>C NMR of compound 4(trans) and 5 were detected by its CDCl<sub>3</sub> solution, while the cis isomers were detected by its DMSO solution.

#### 4. 4aa

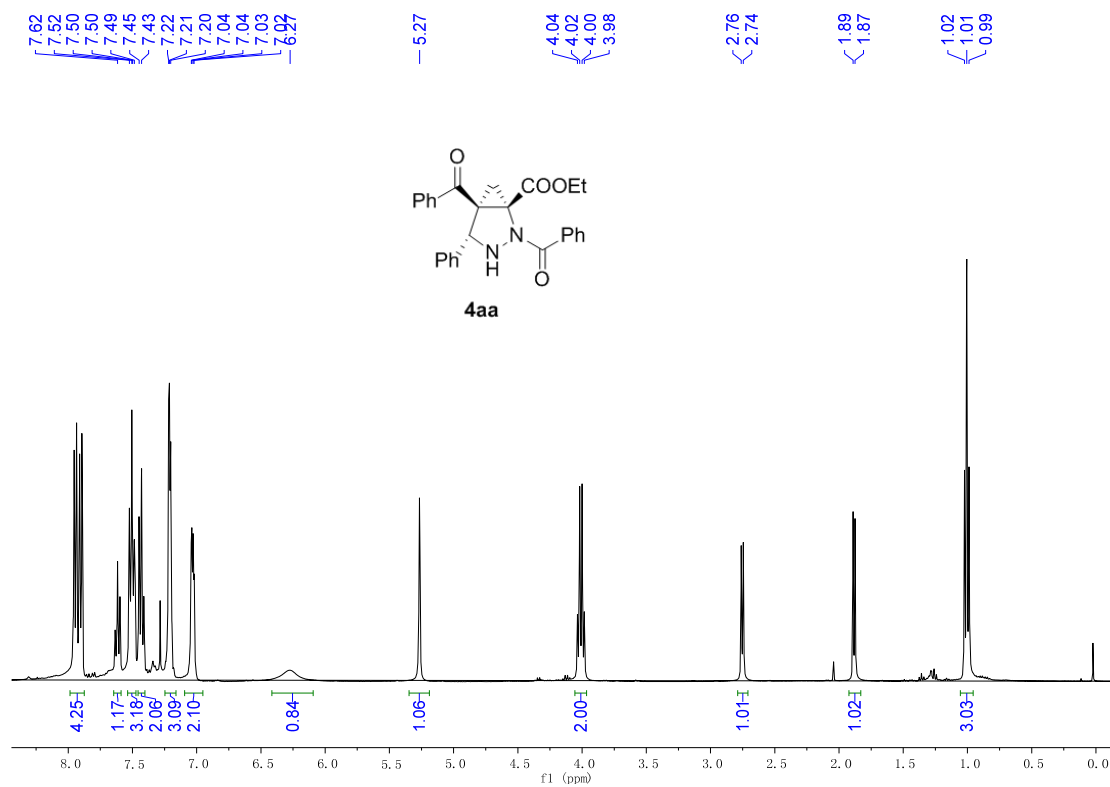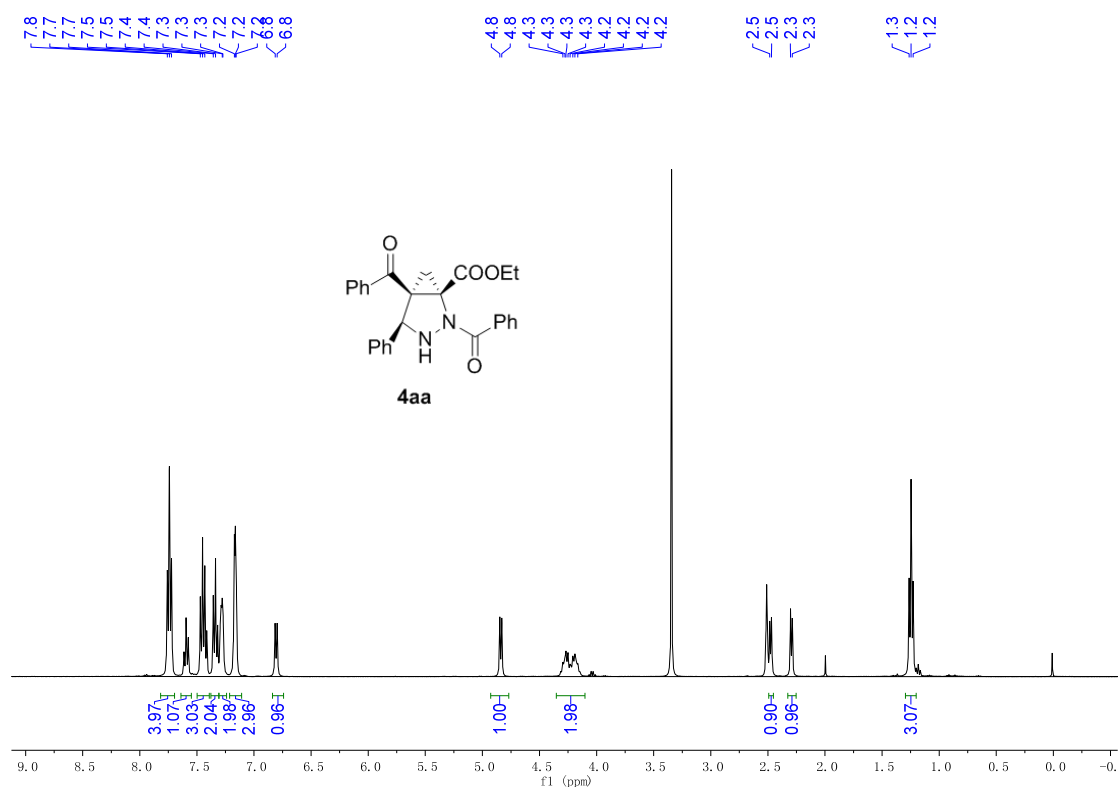

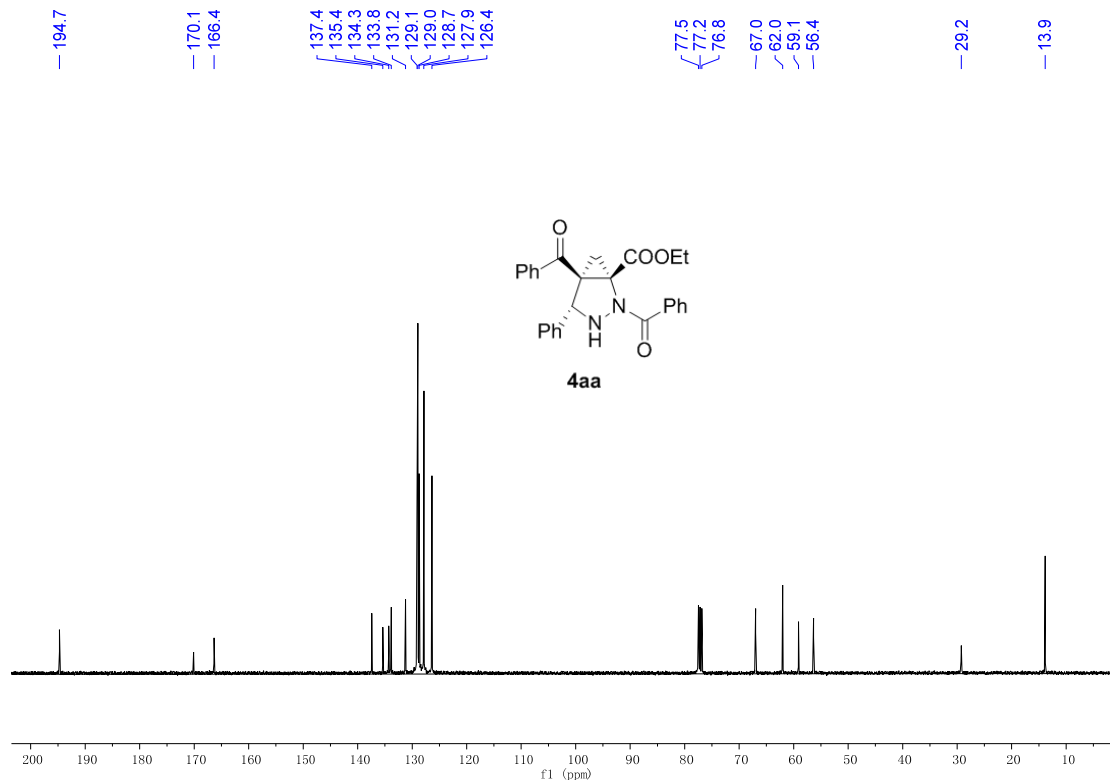

### 5. 4ba

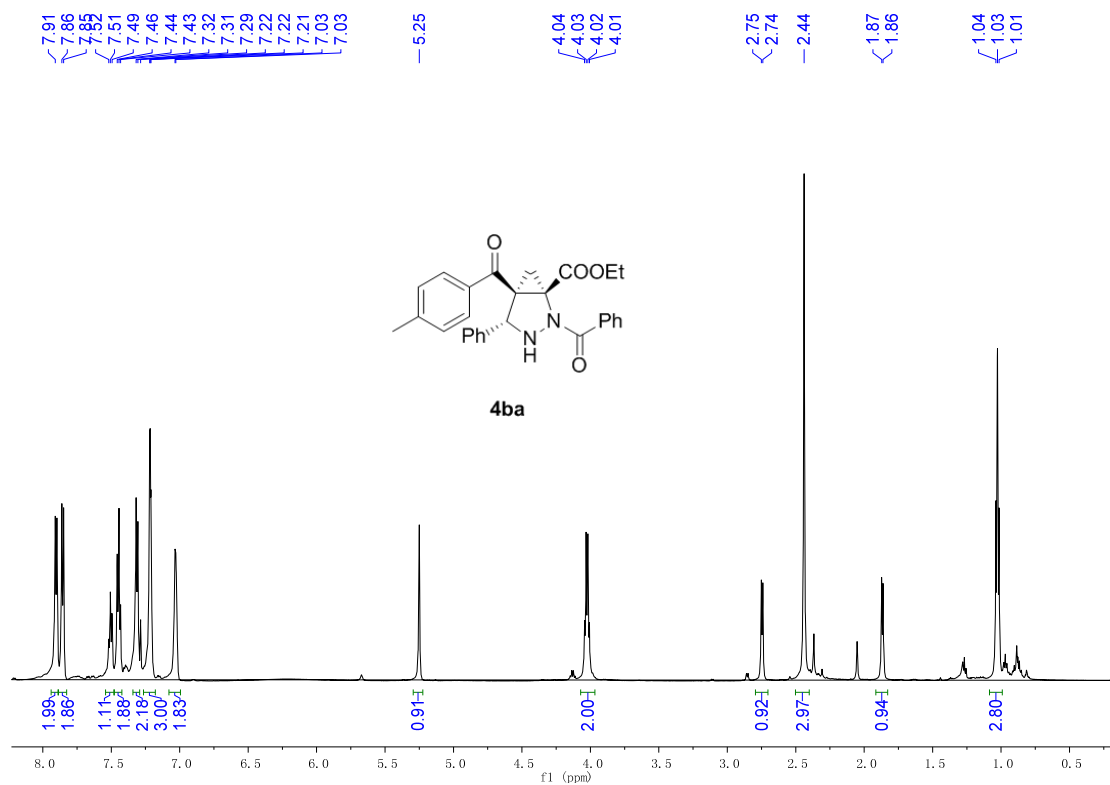

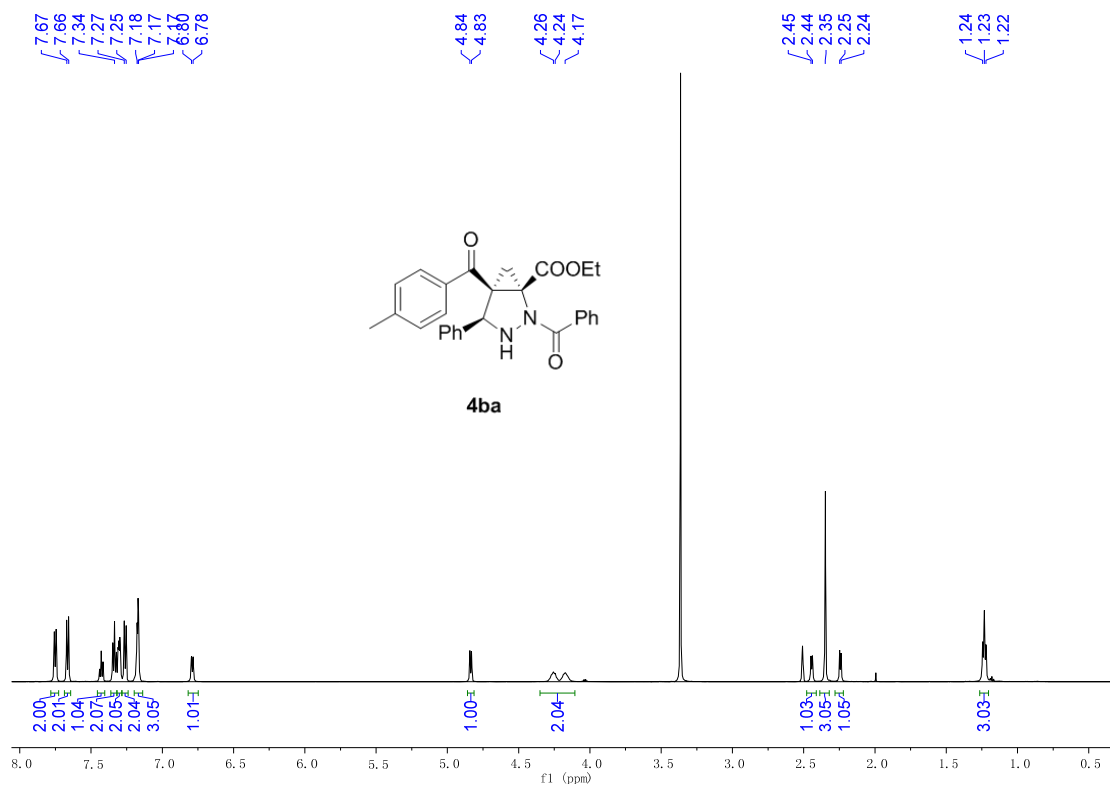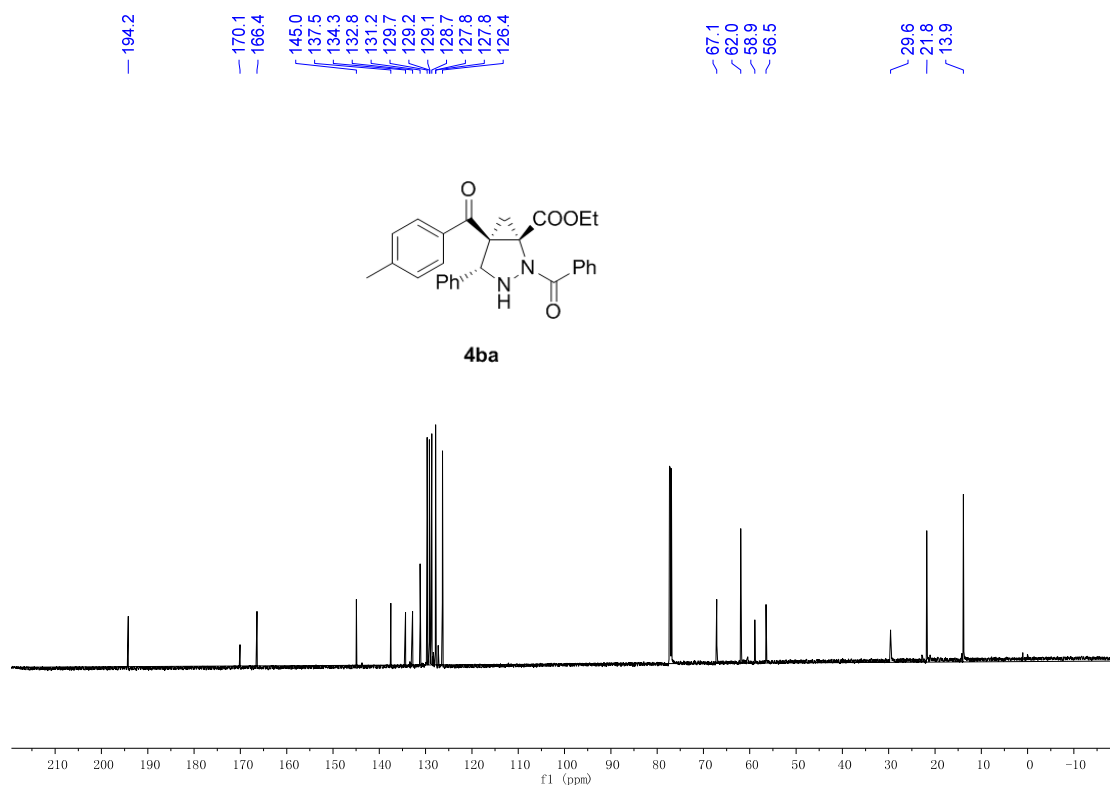

6. 4ca

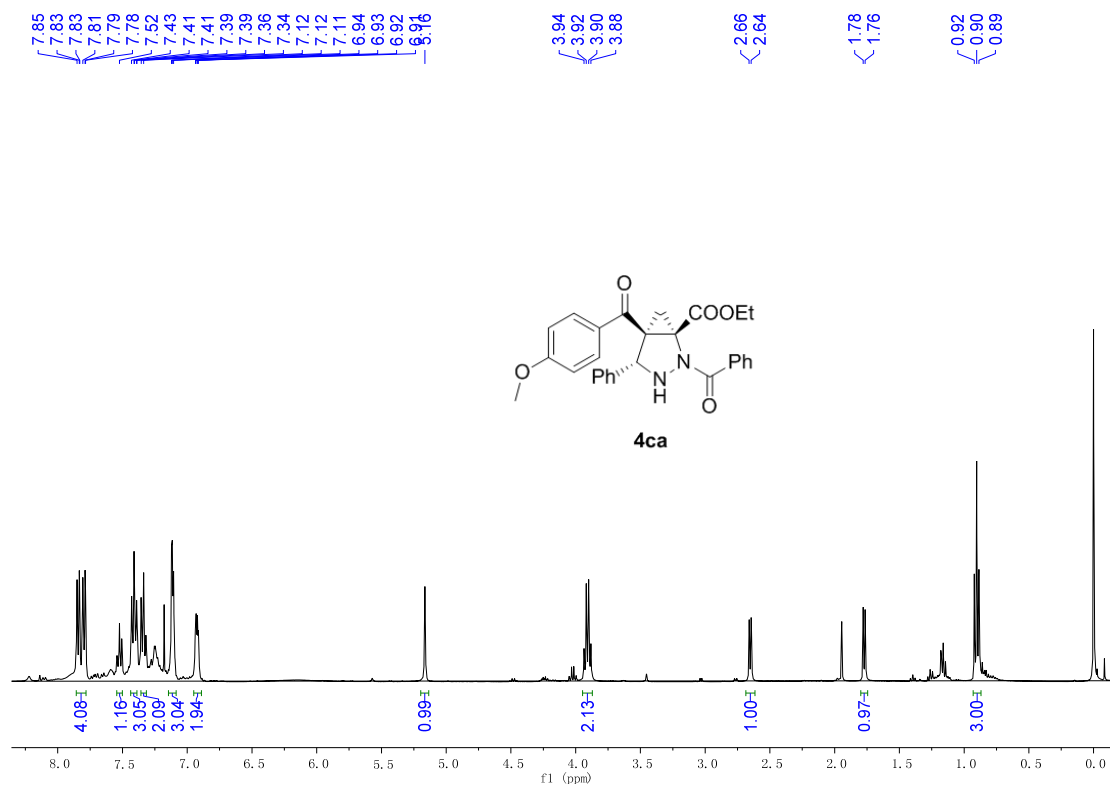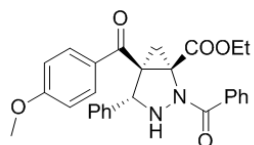

4ca

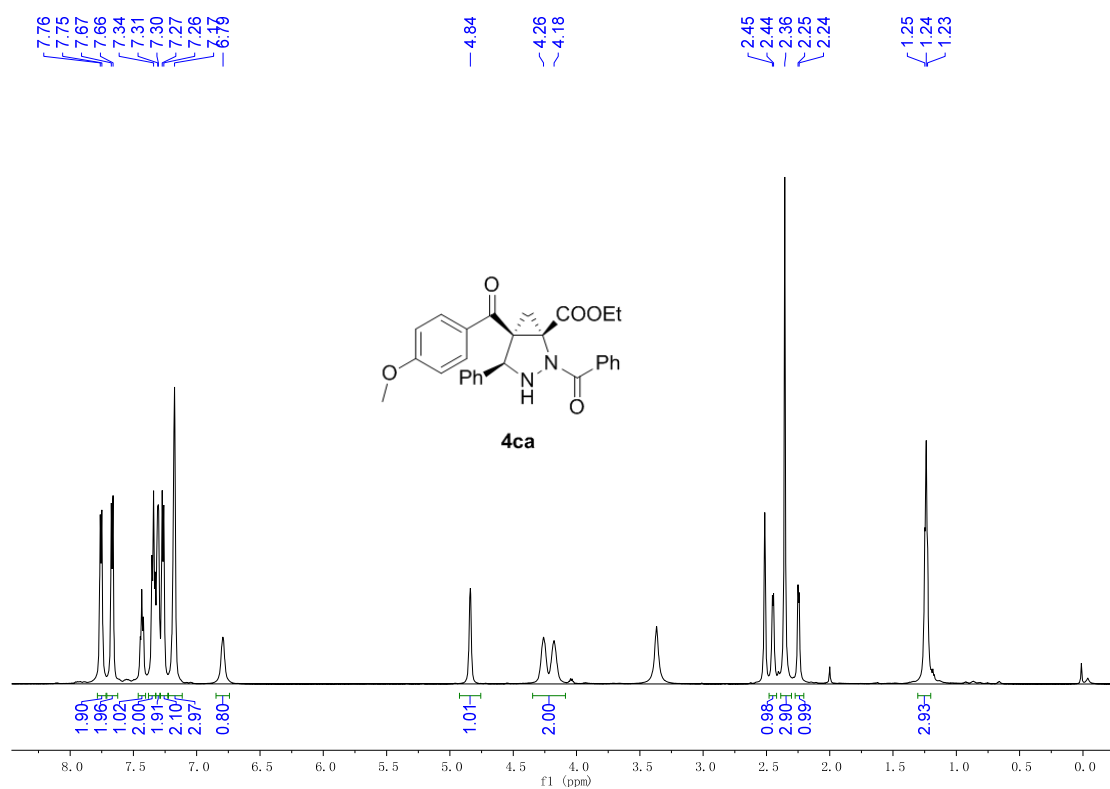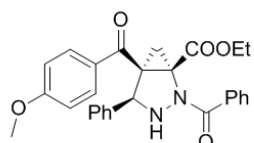

4ca

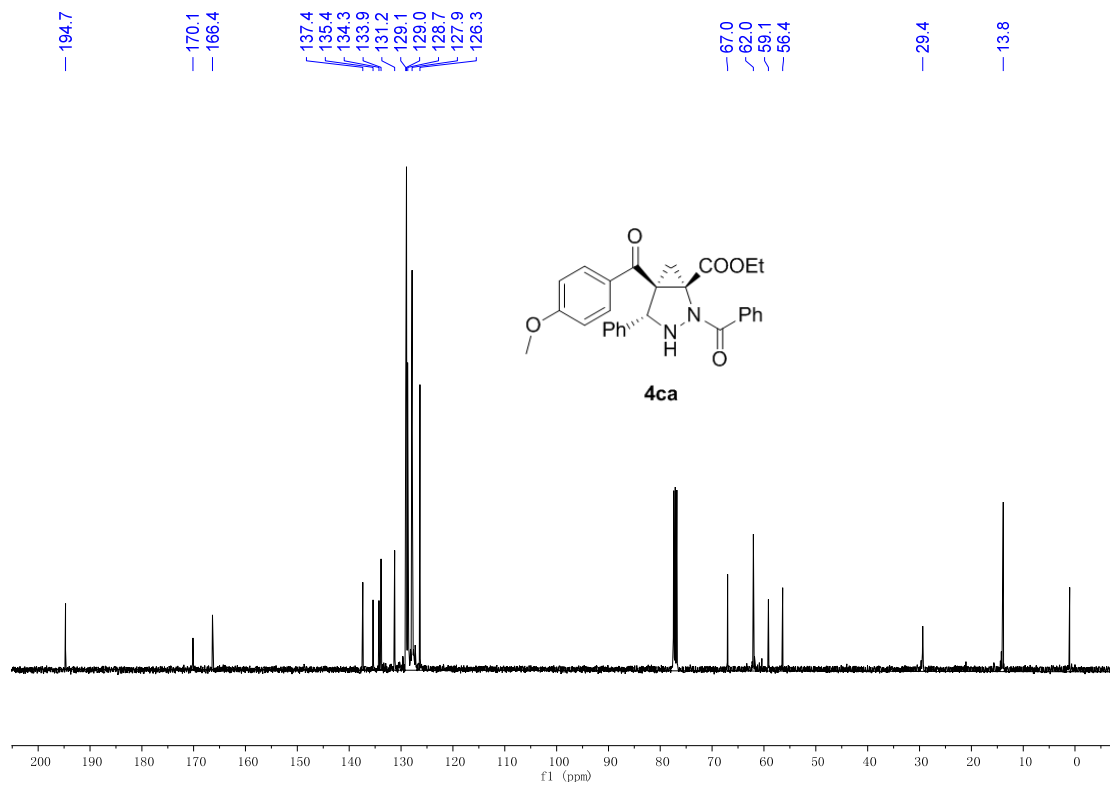

### 7. 4da

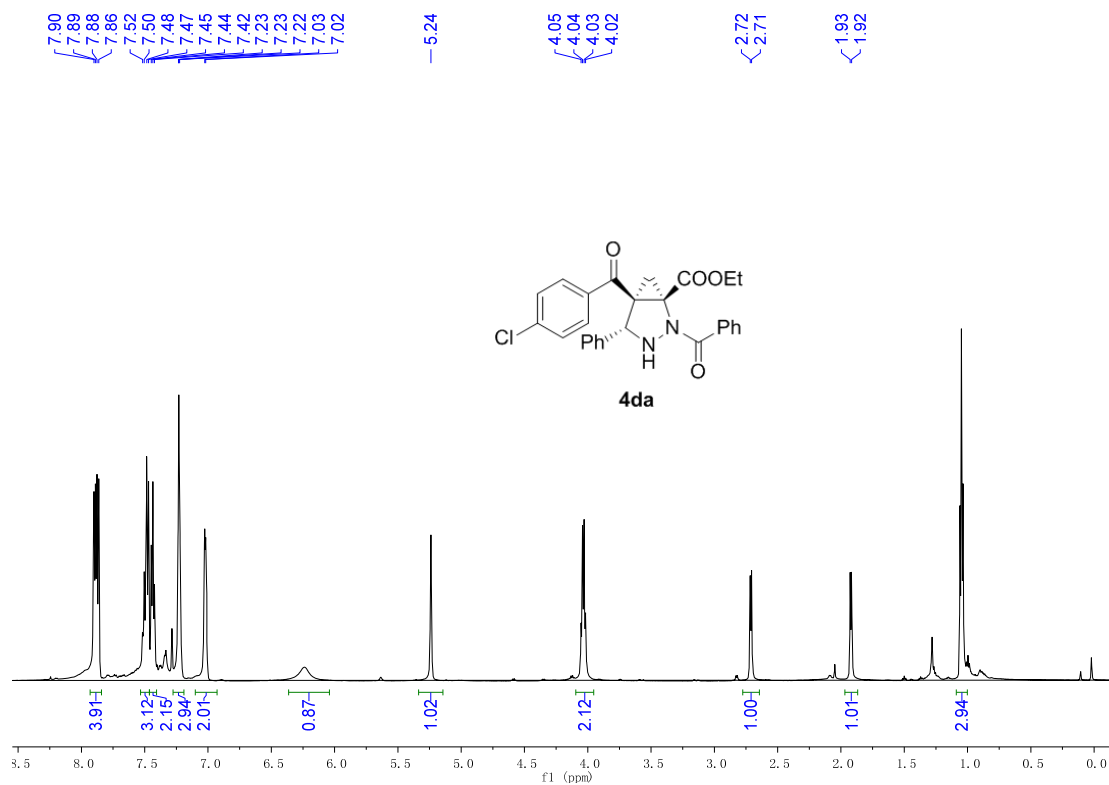

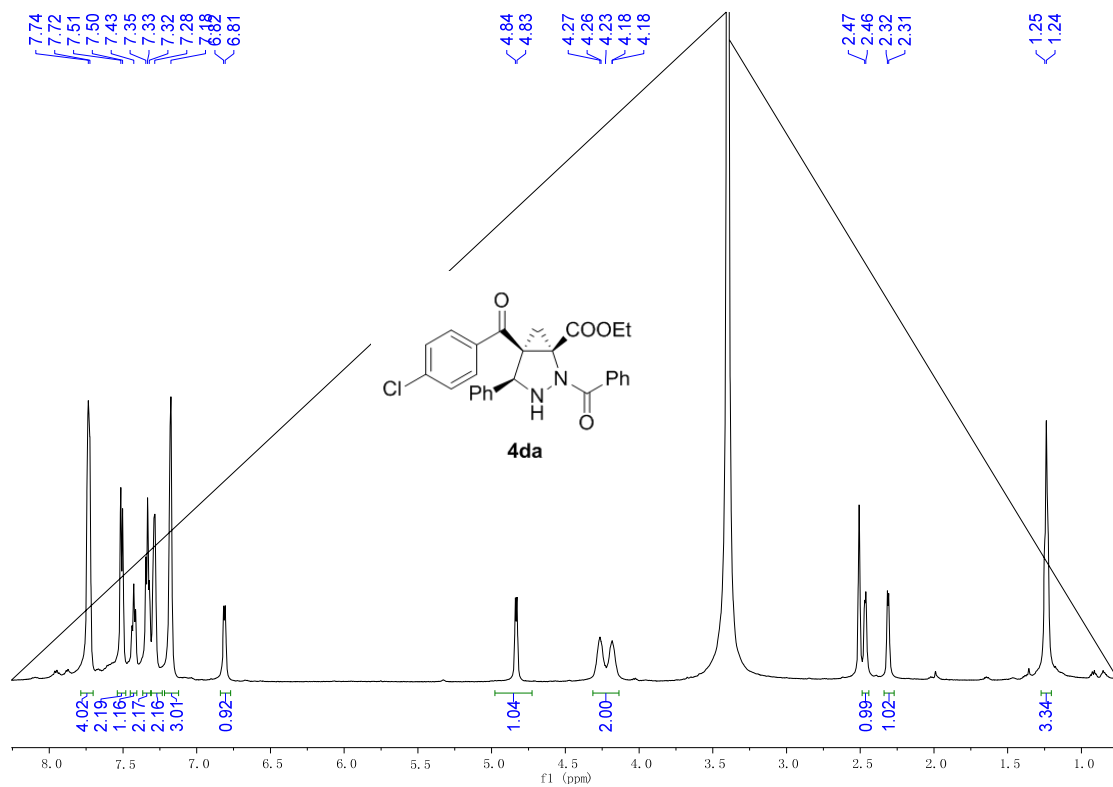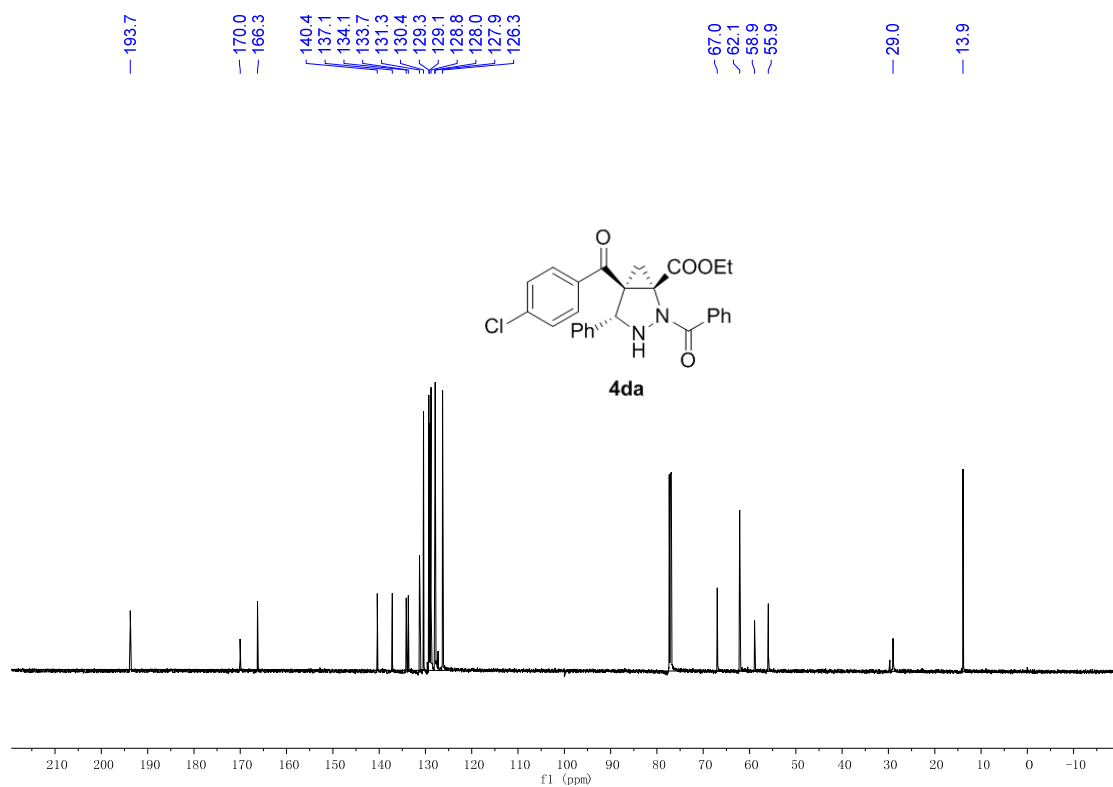

8. 4ea



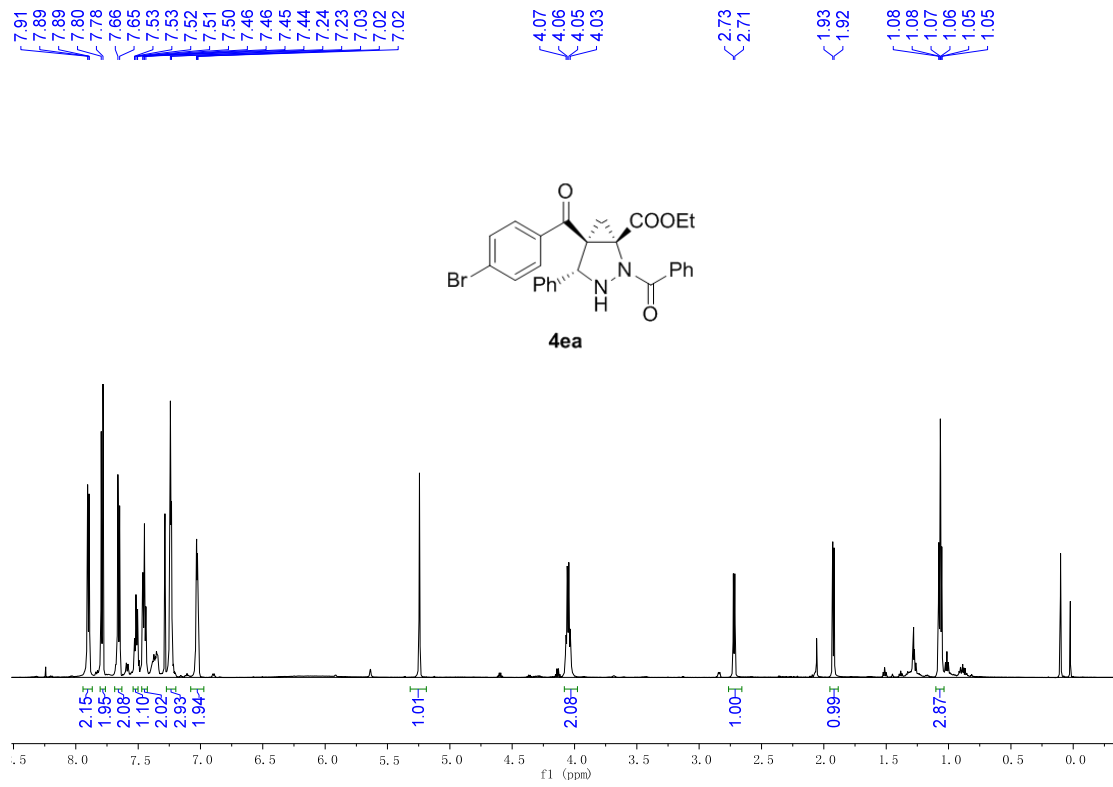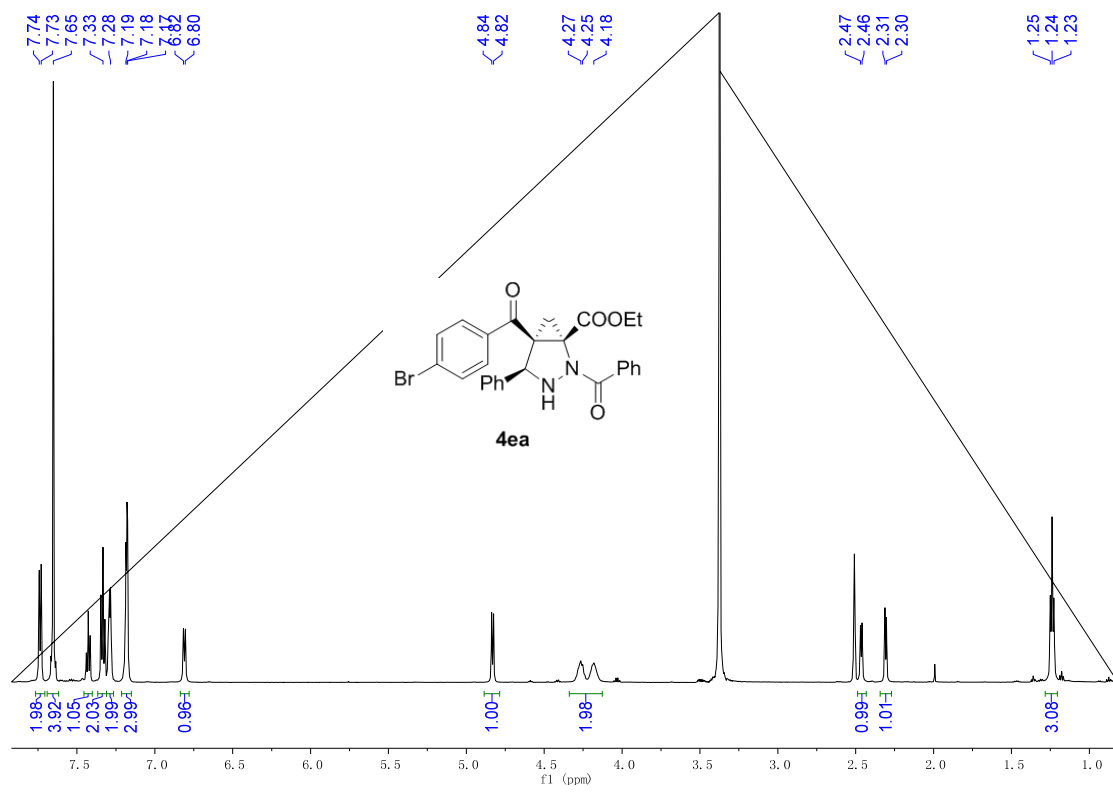

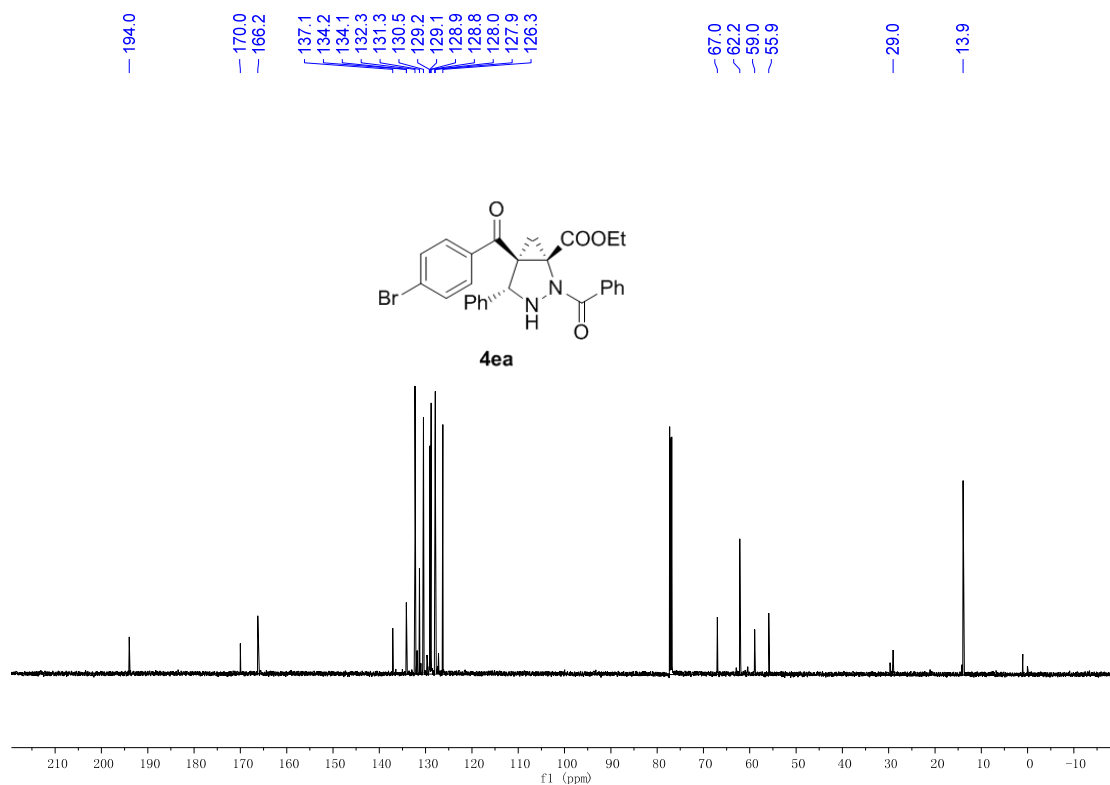

9. **4fa**

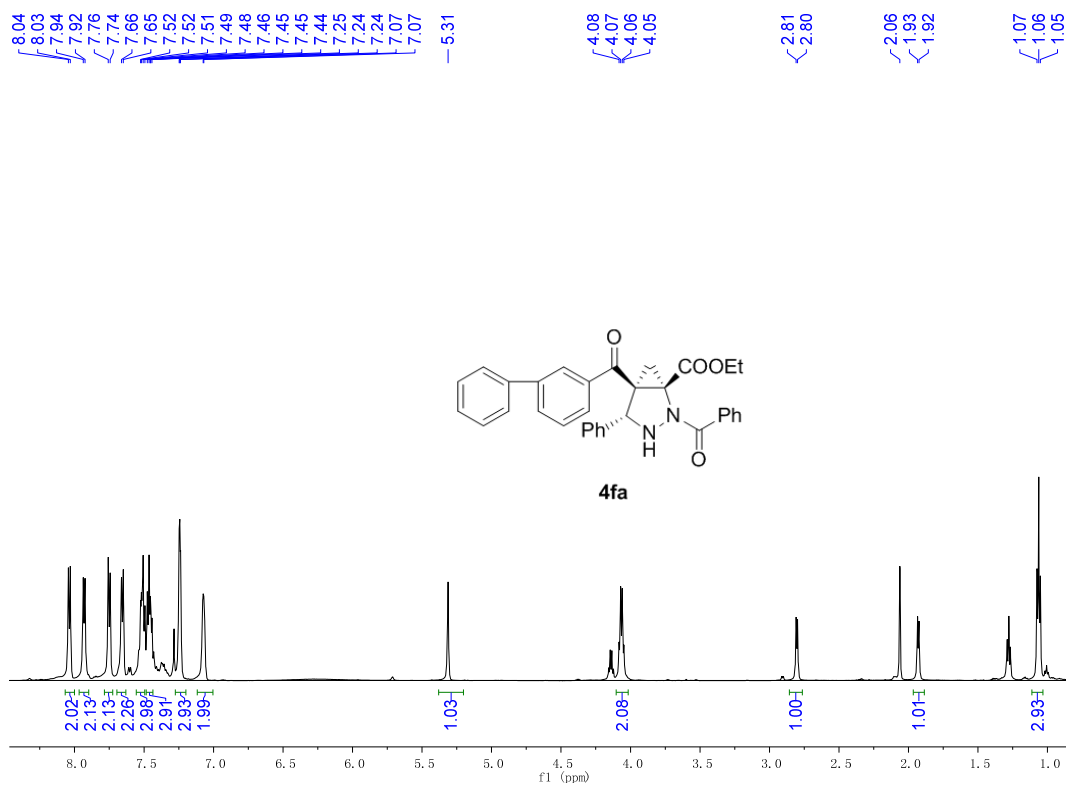

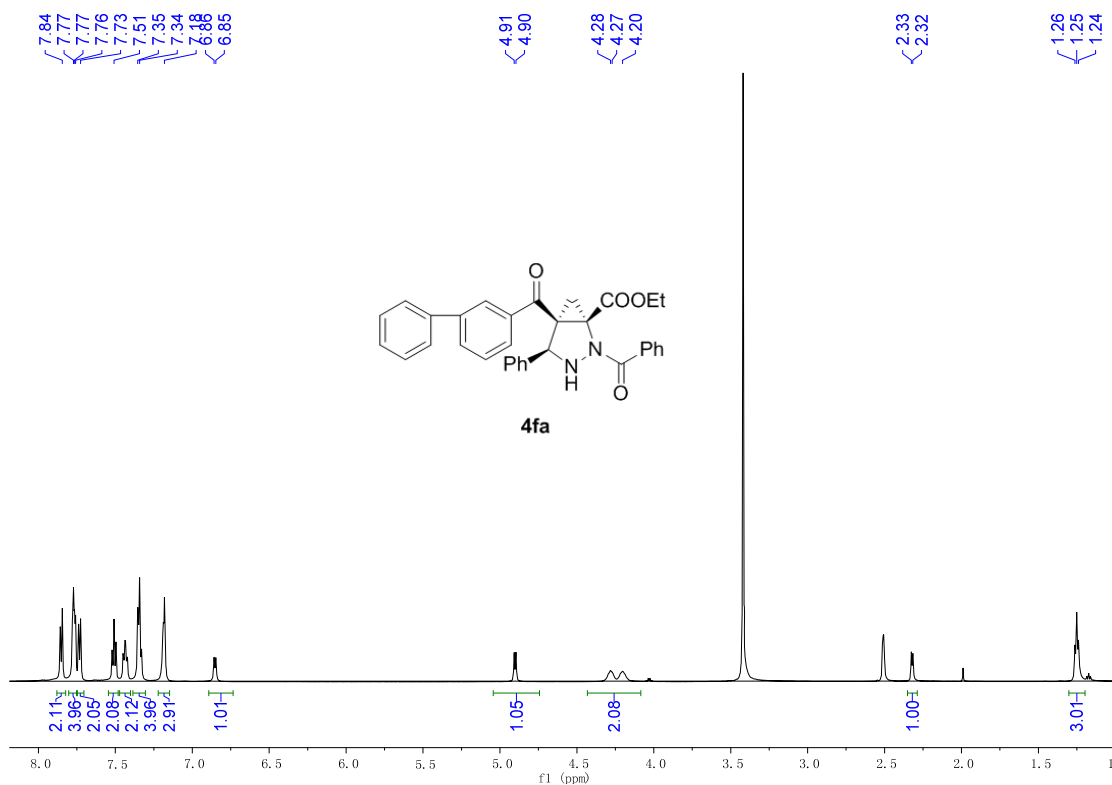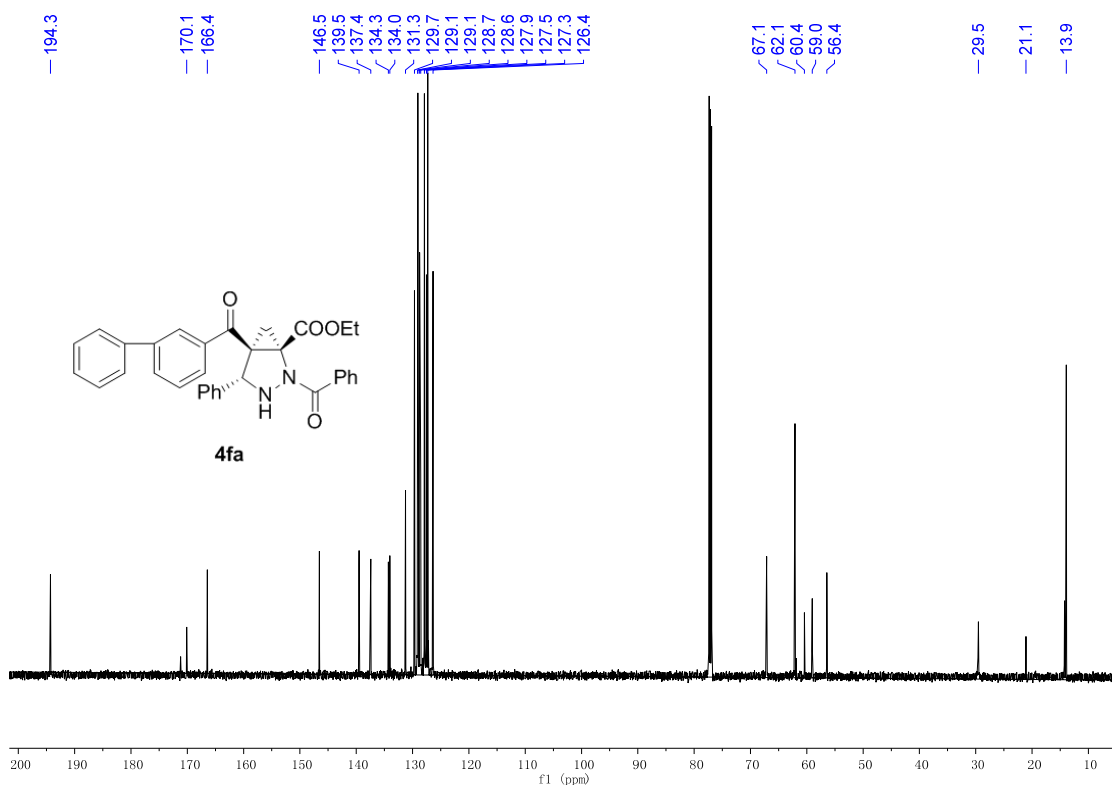

10.4ga

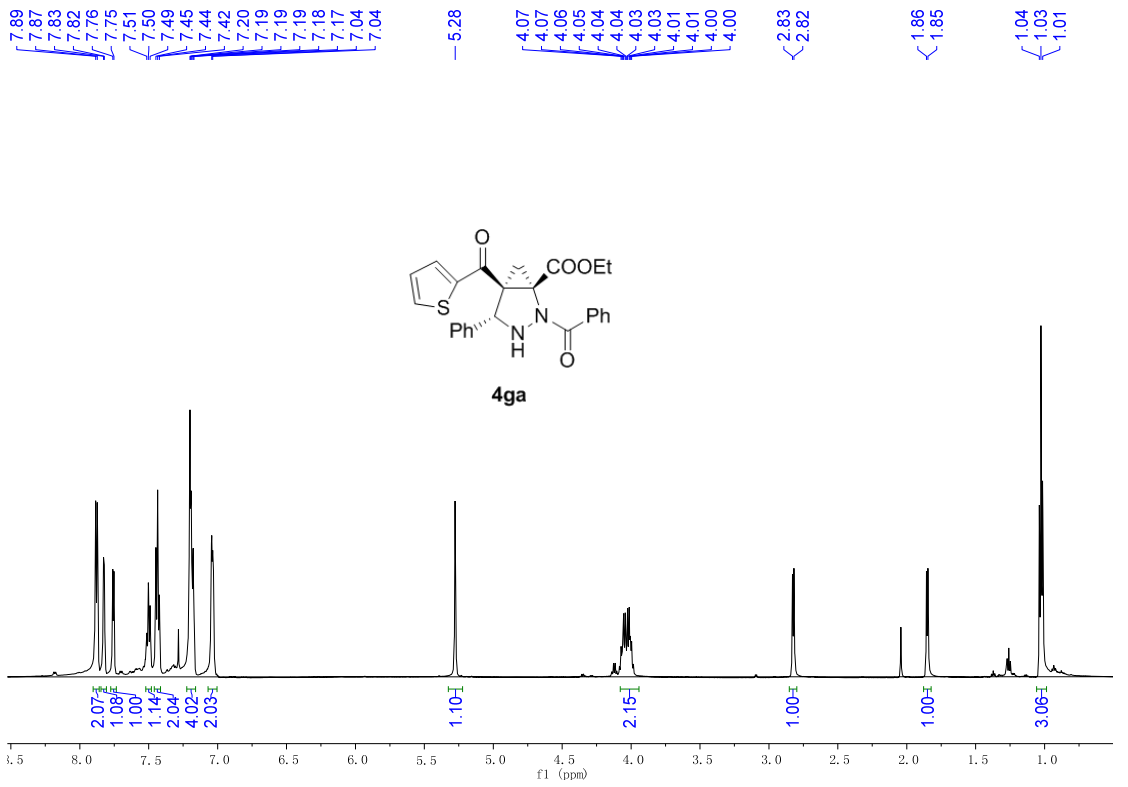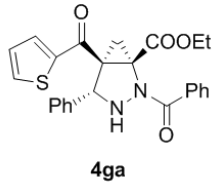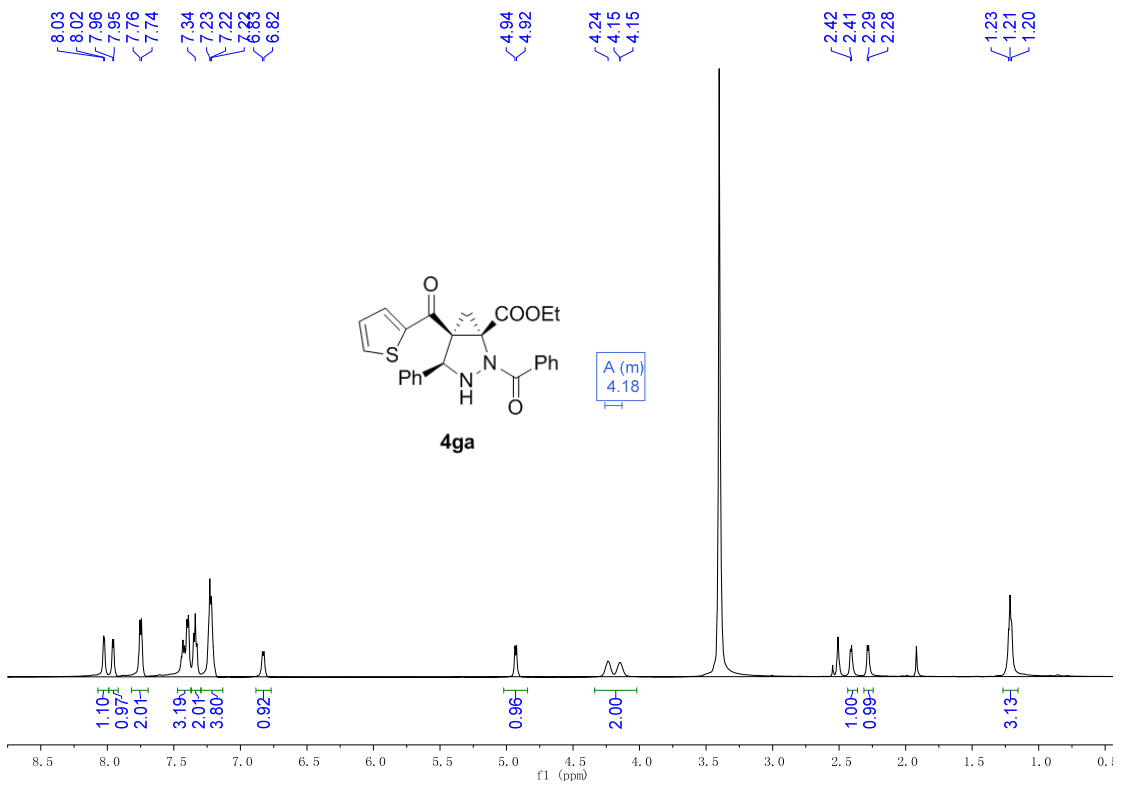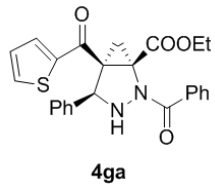

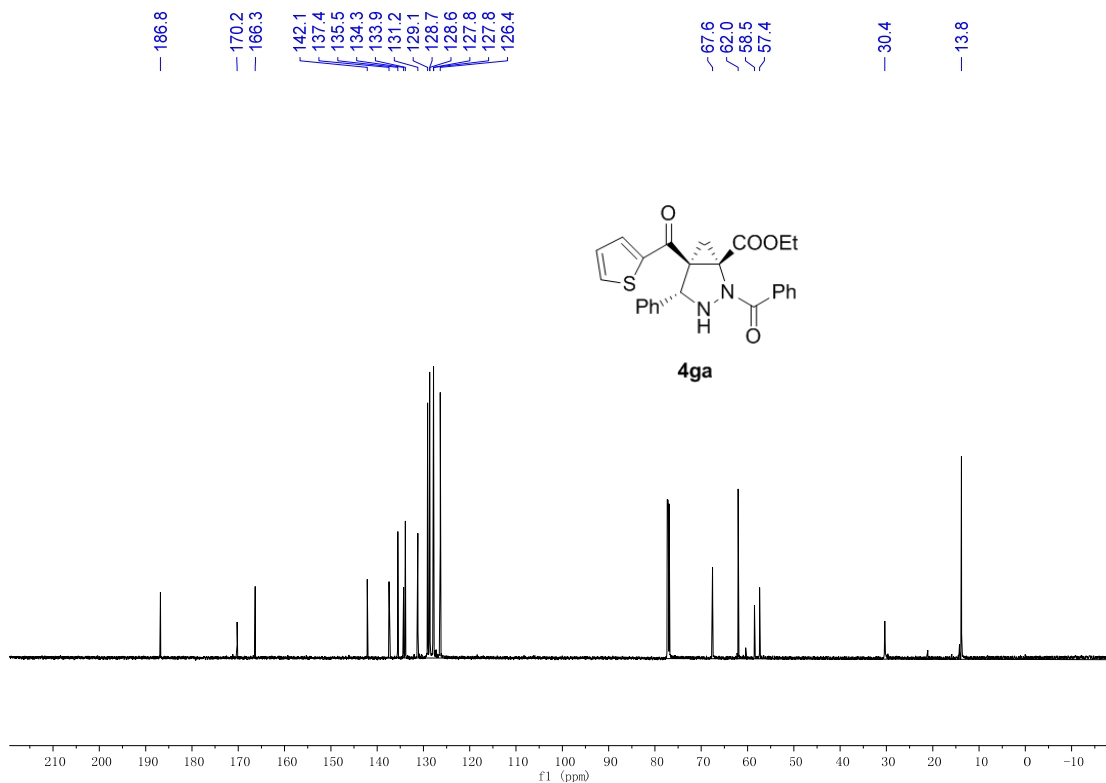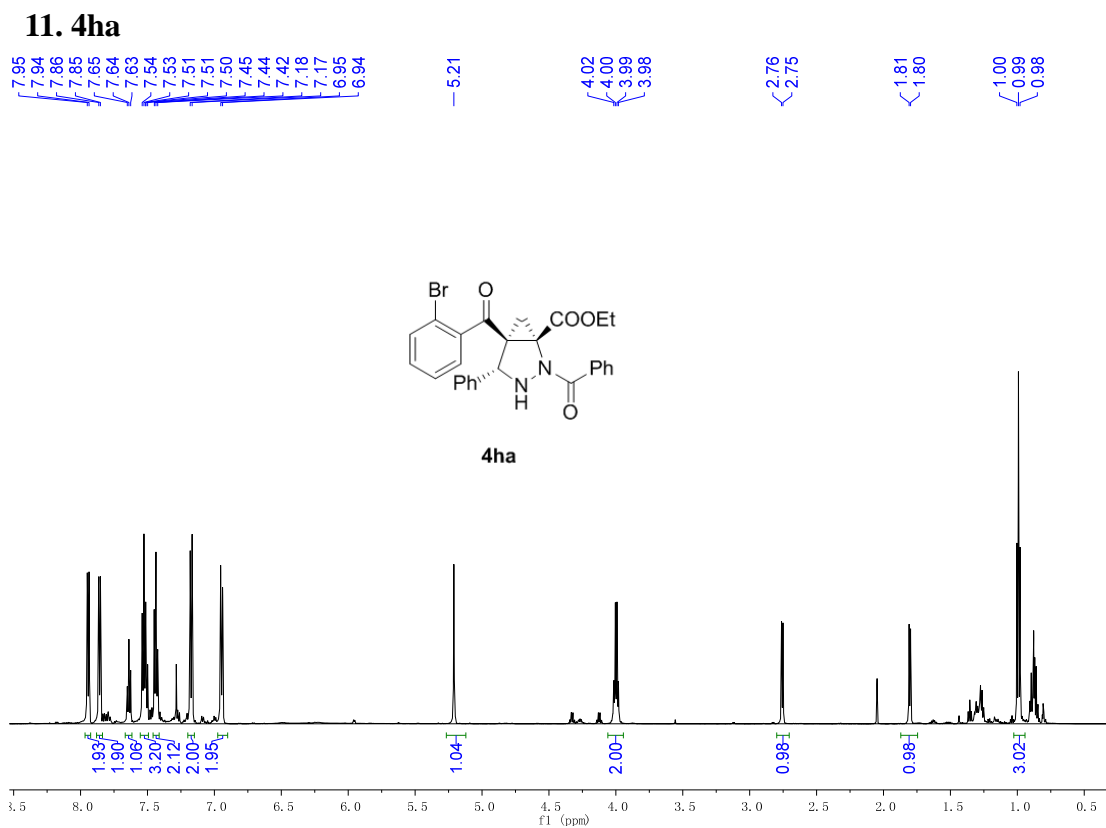

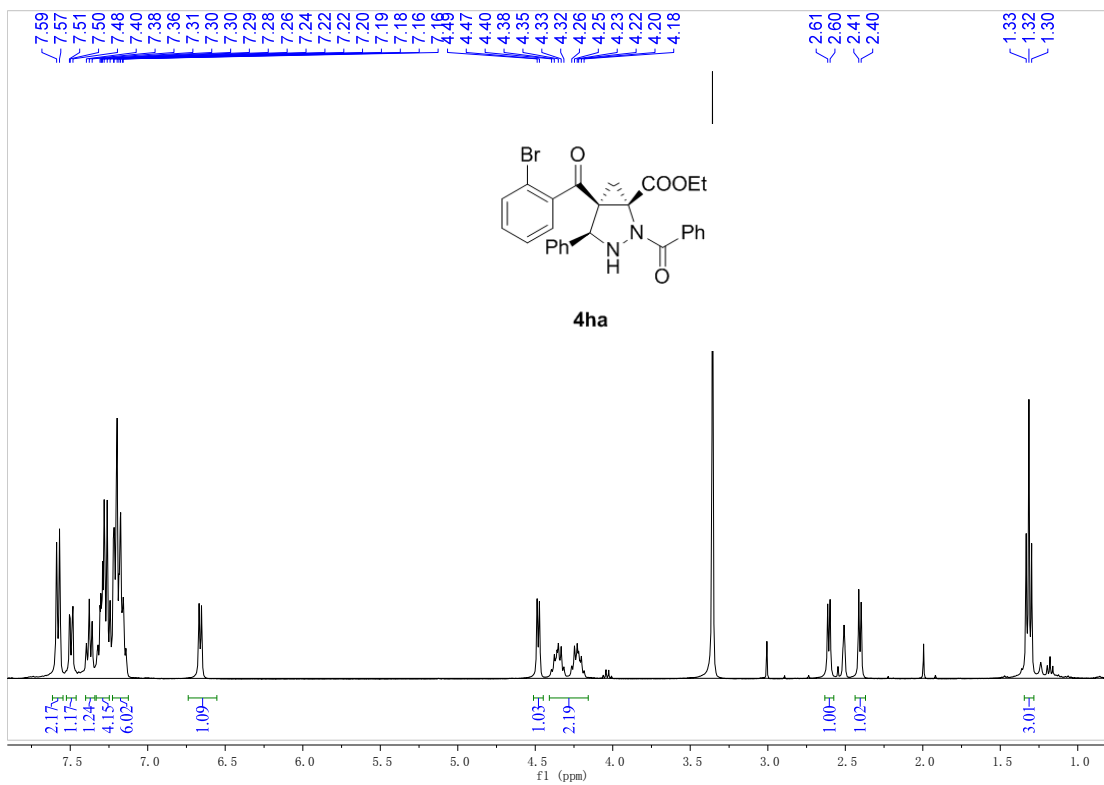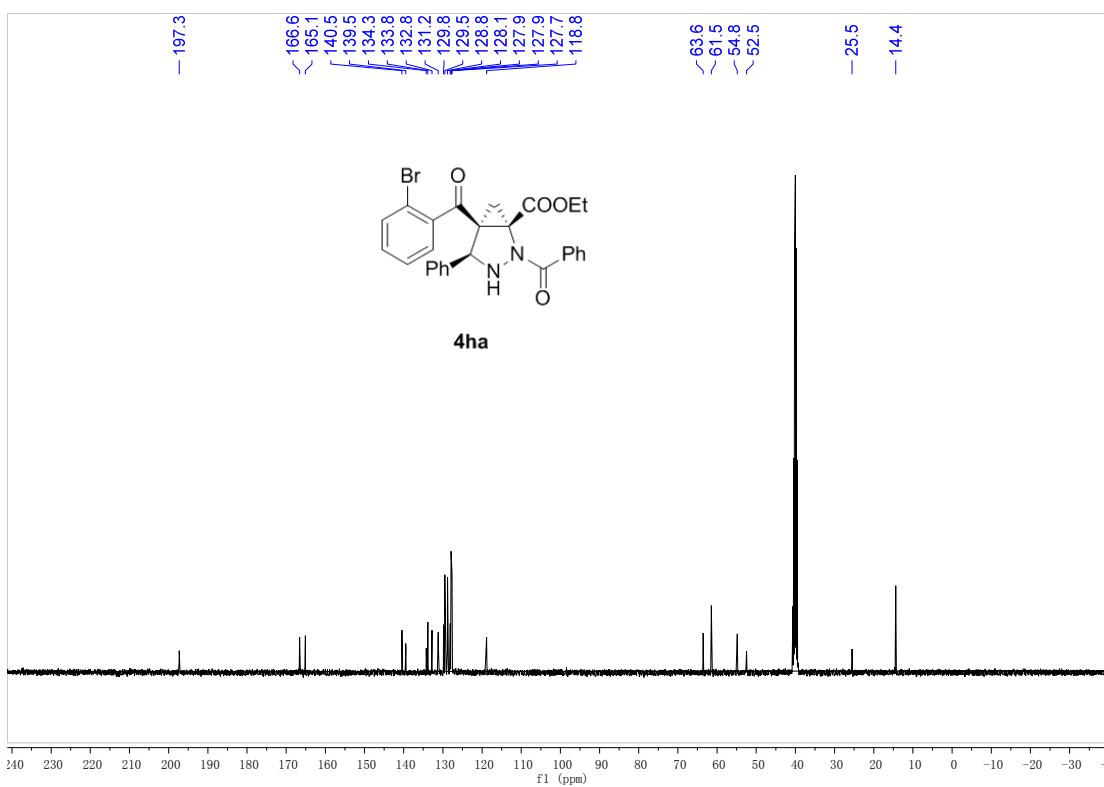

12. 4ia

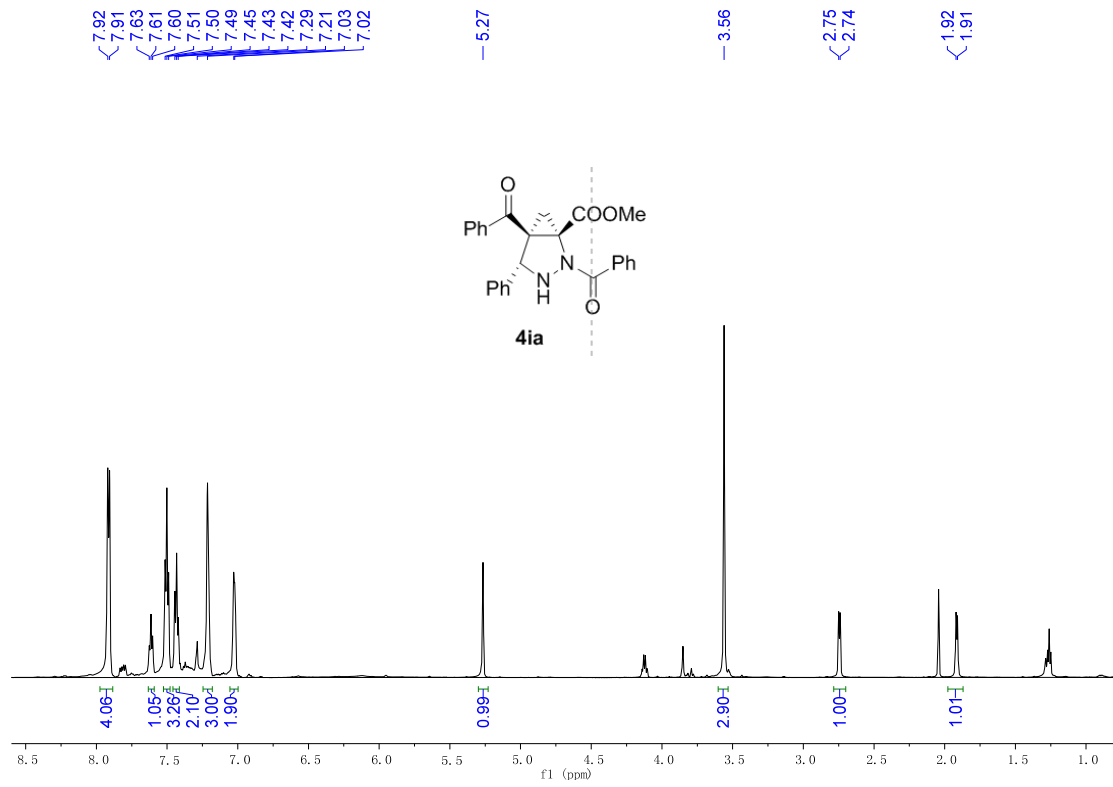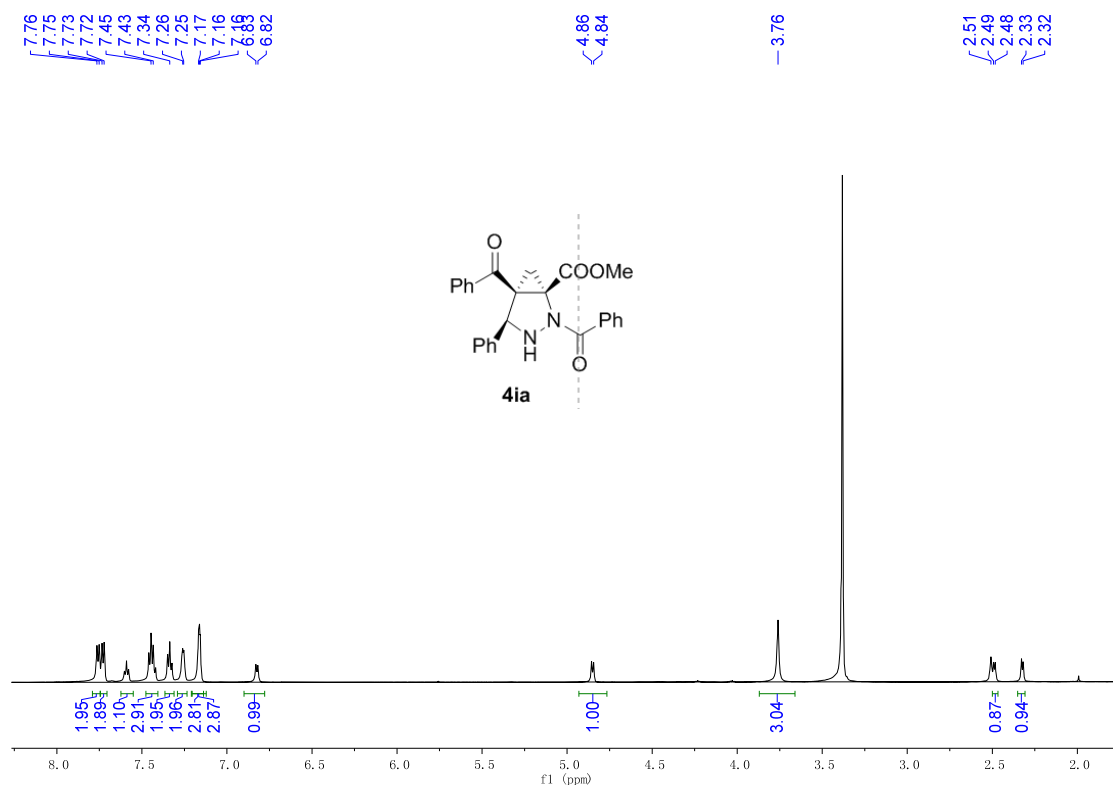

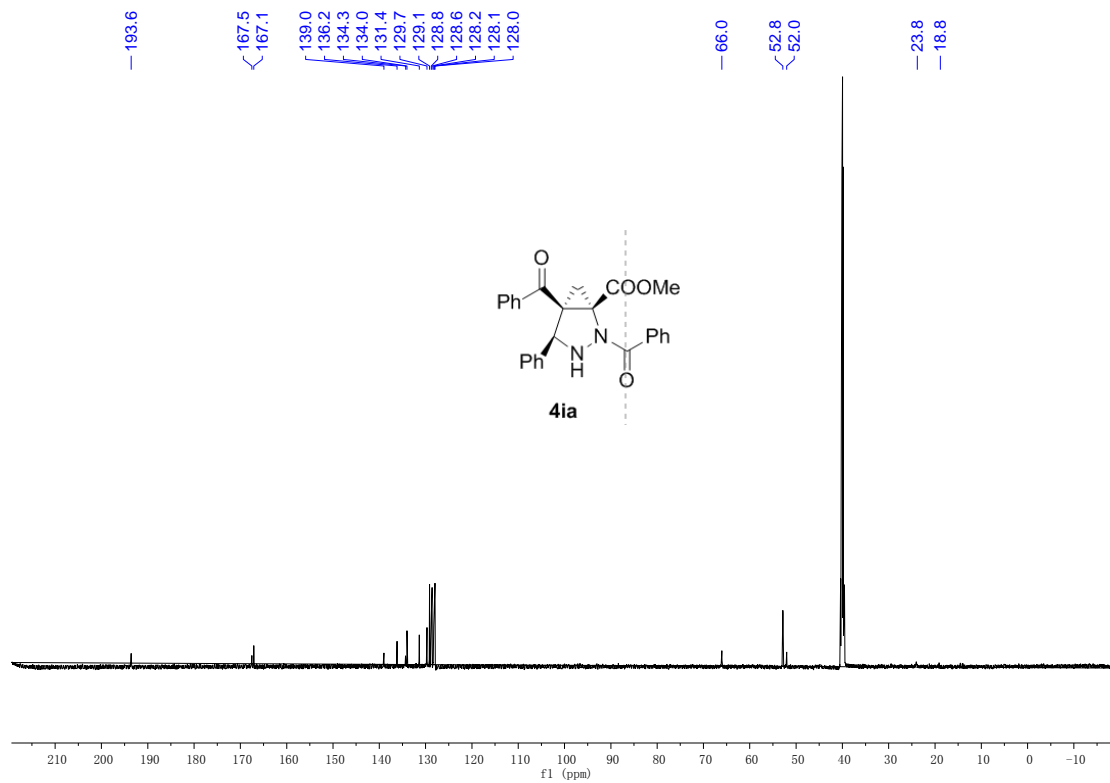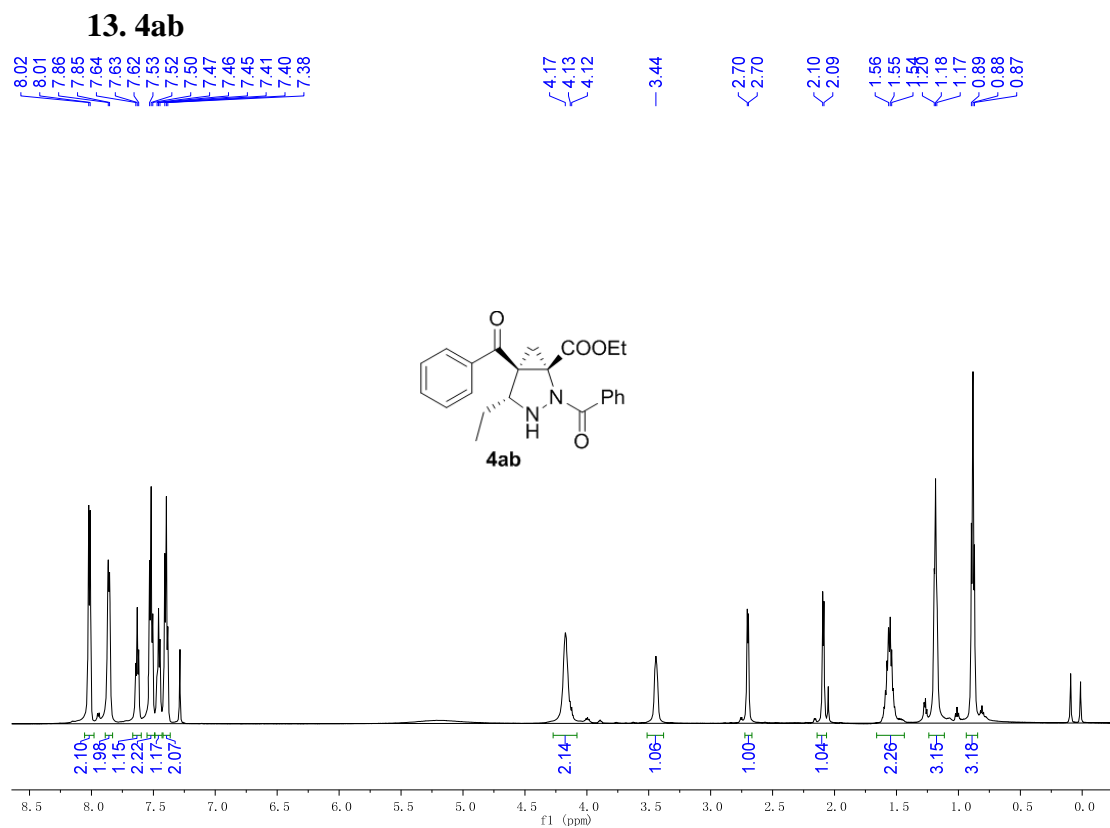



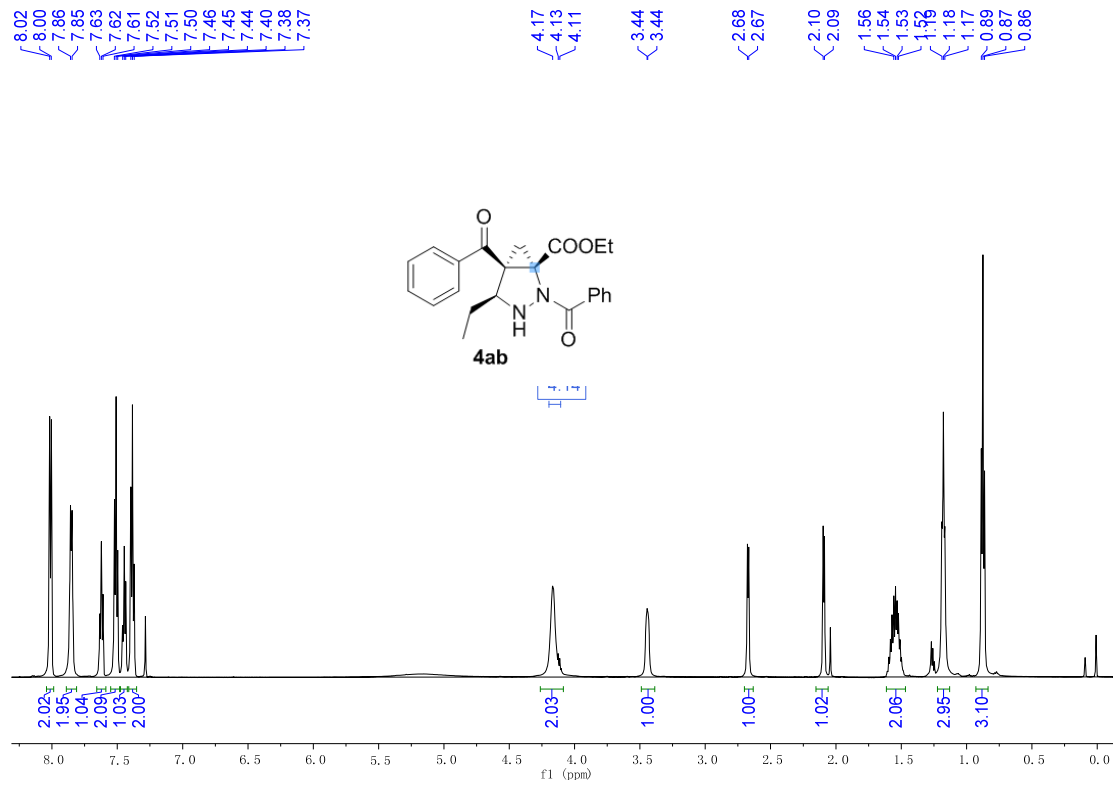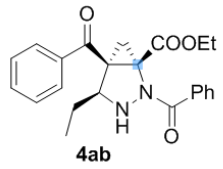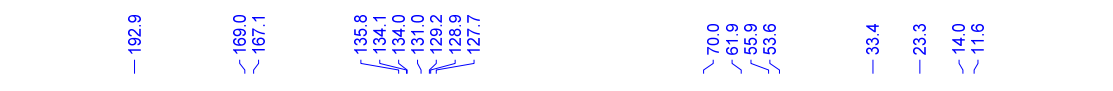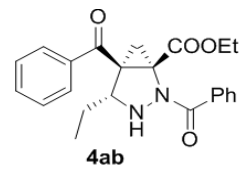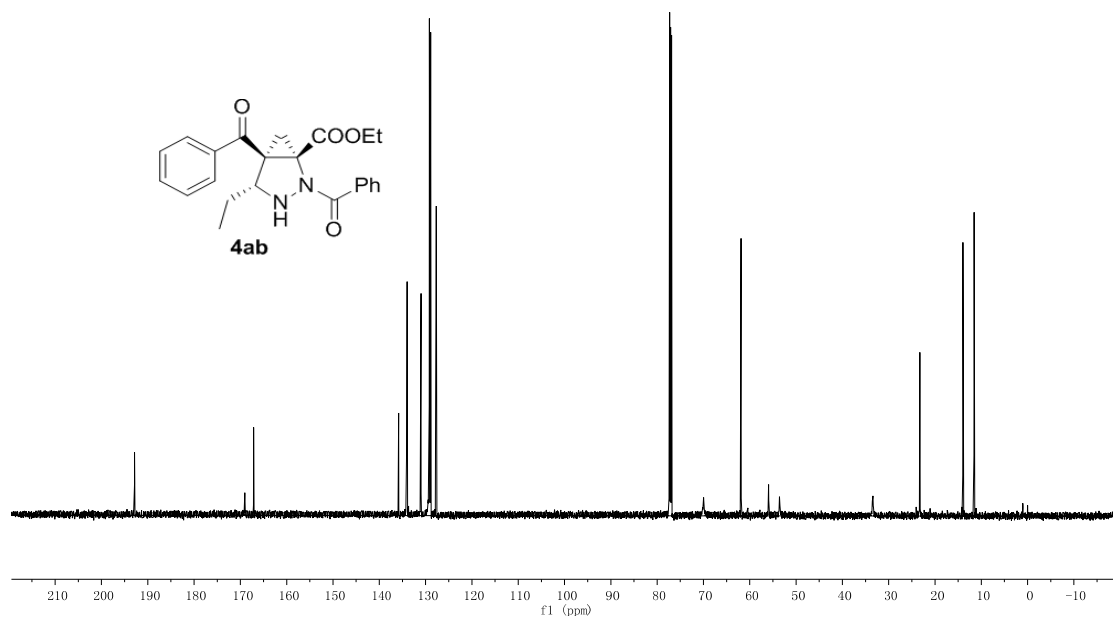

14.4ac

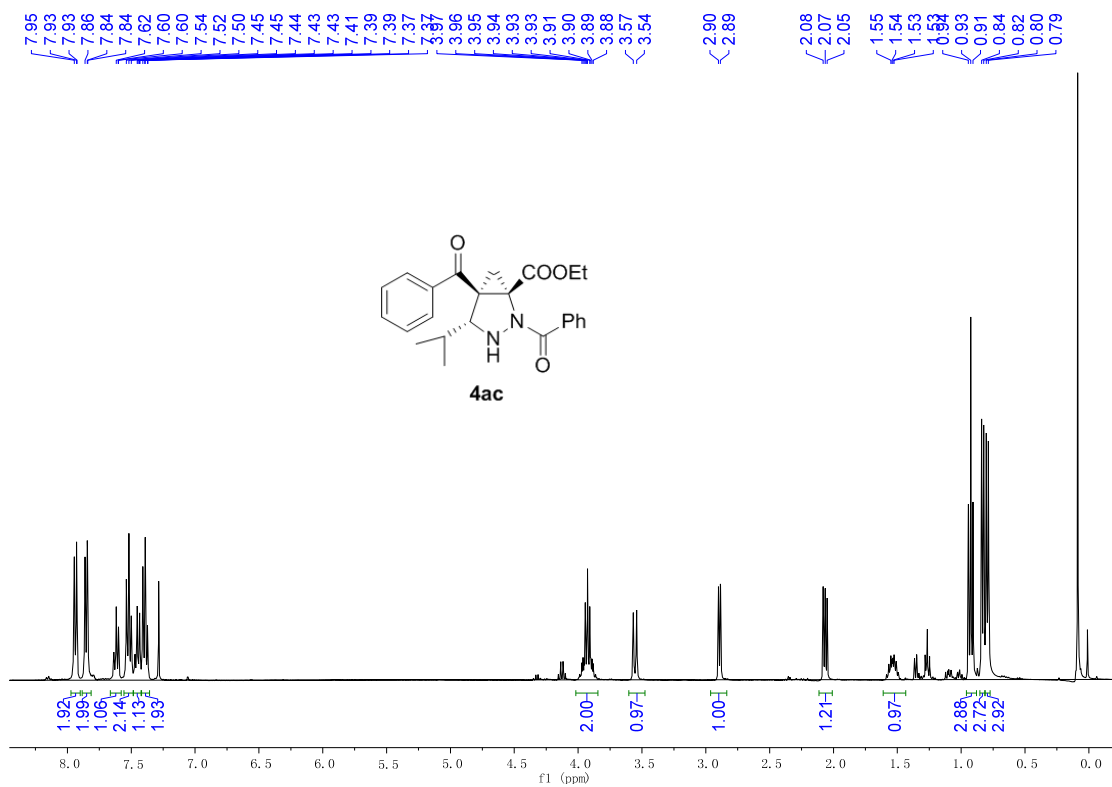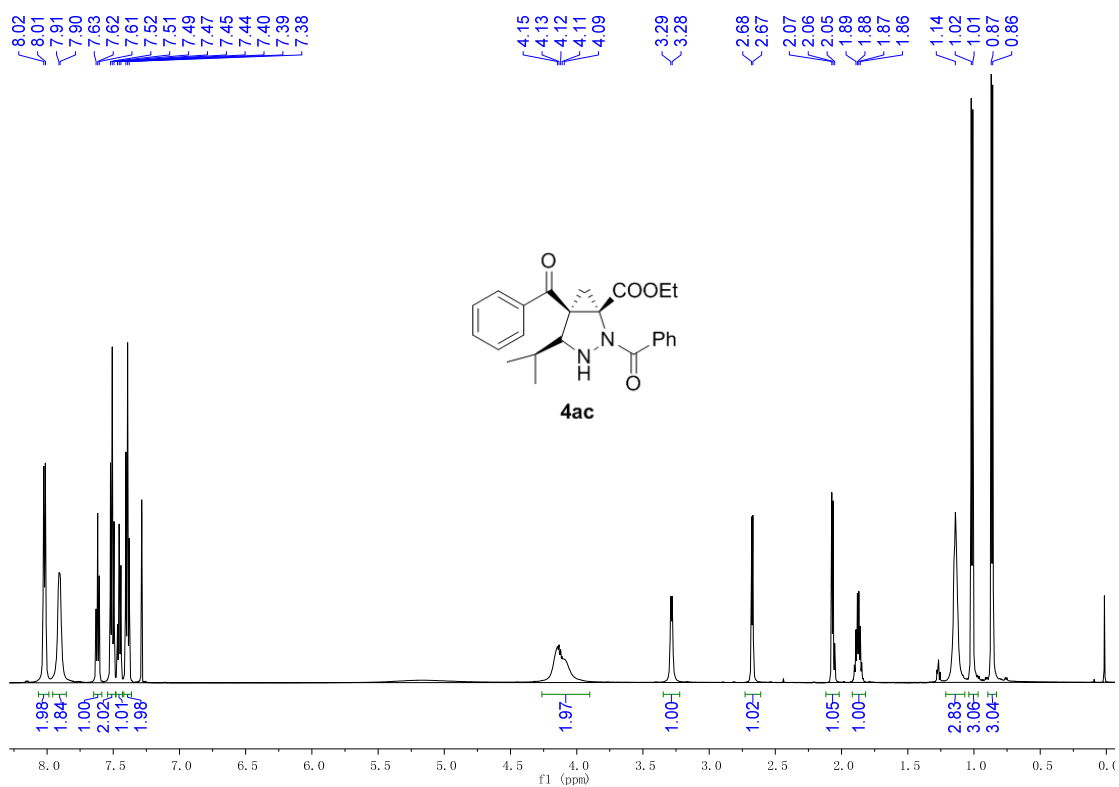

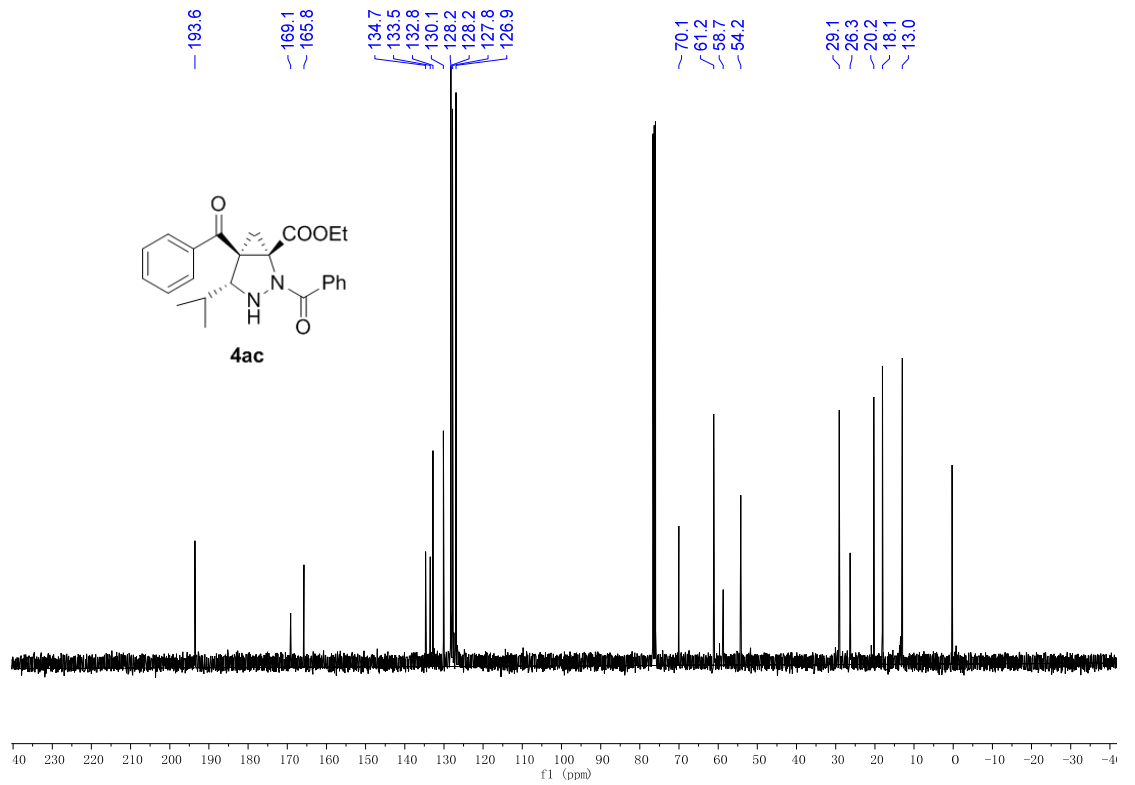

15. 4ad

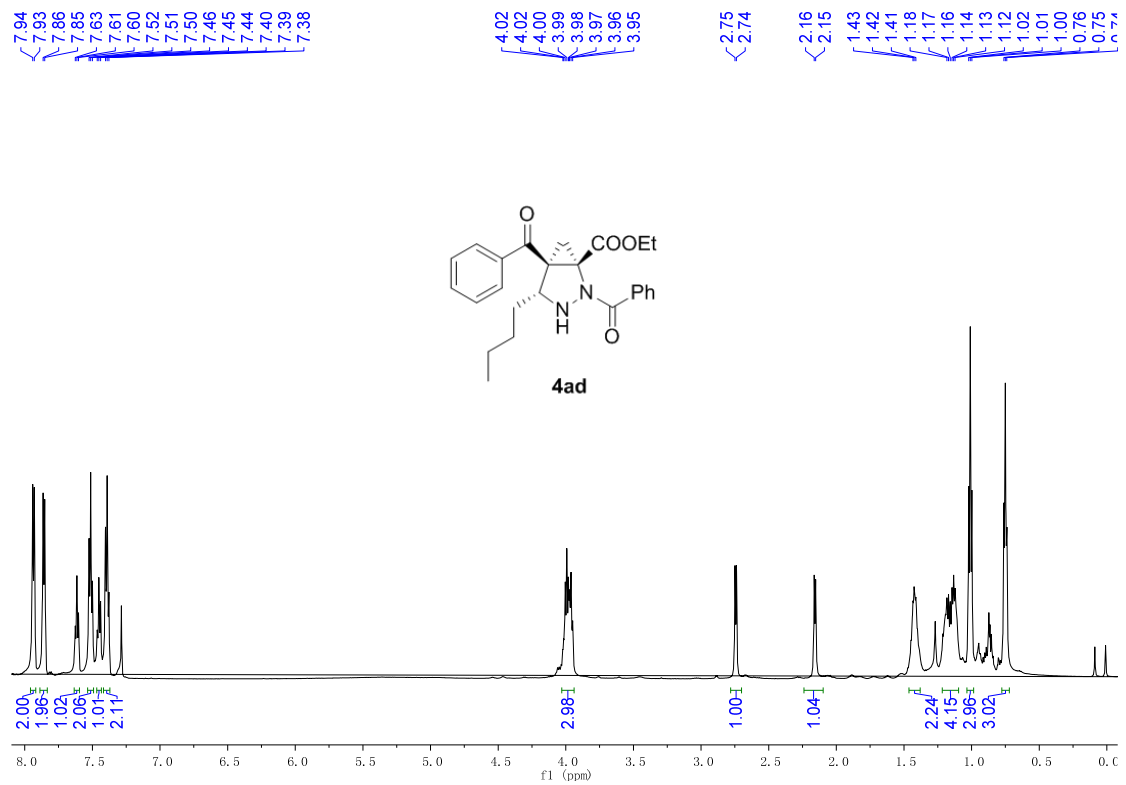

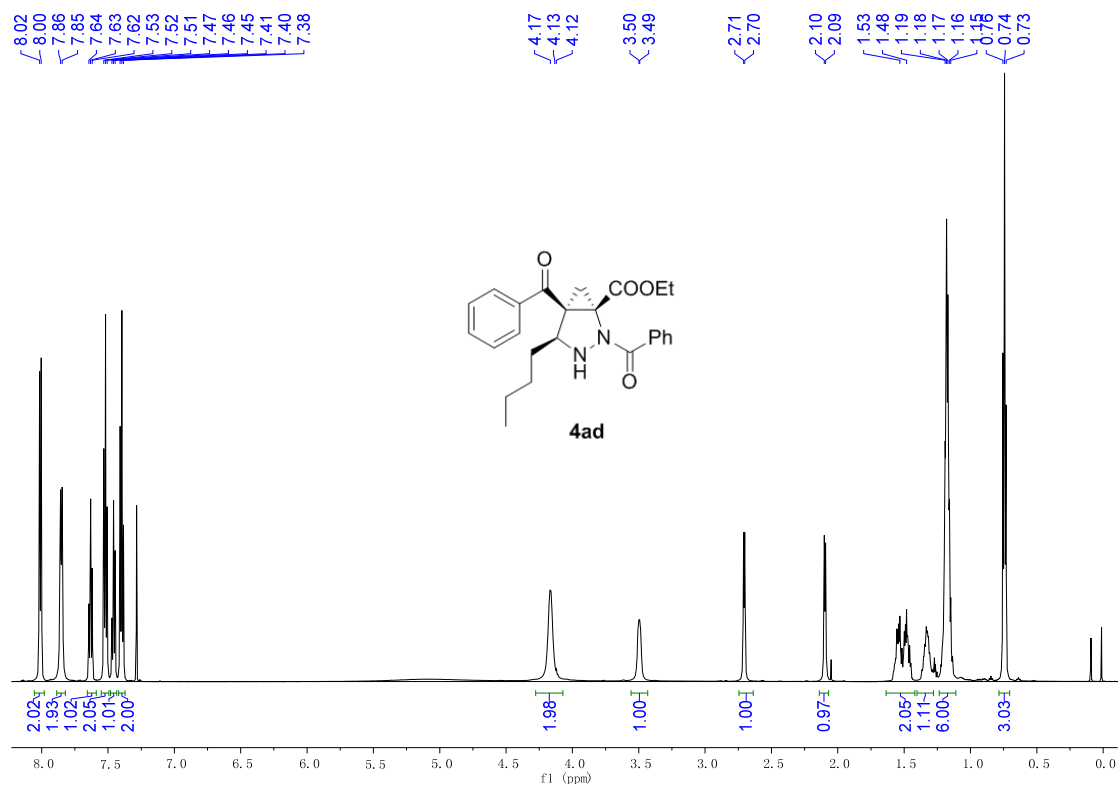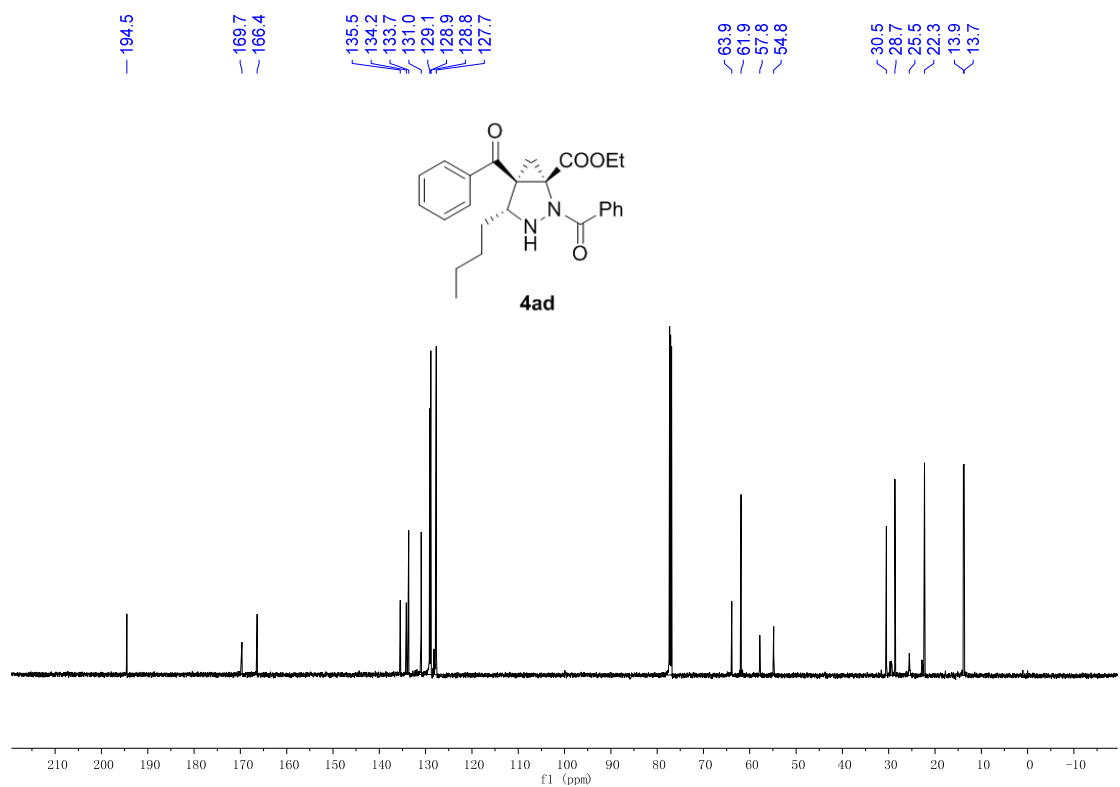

16. 4ae

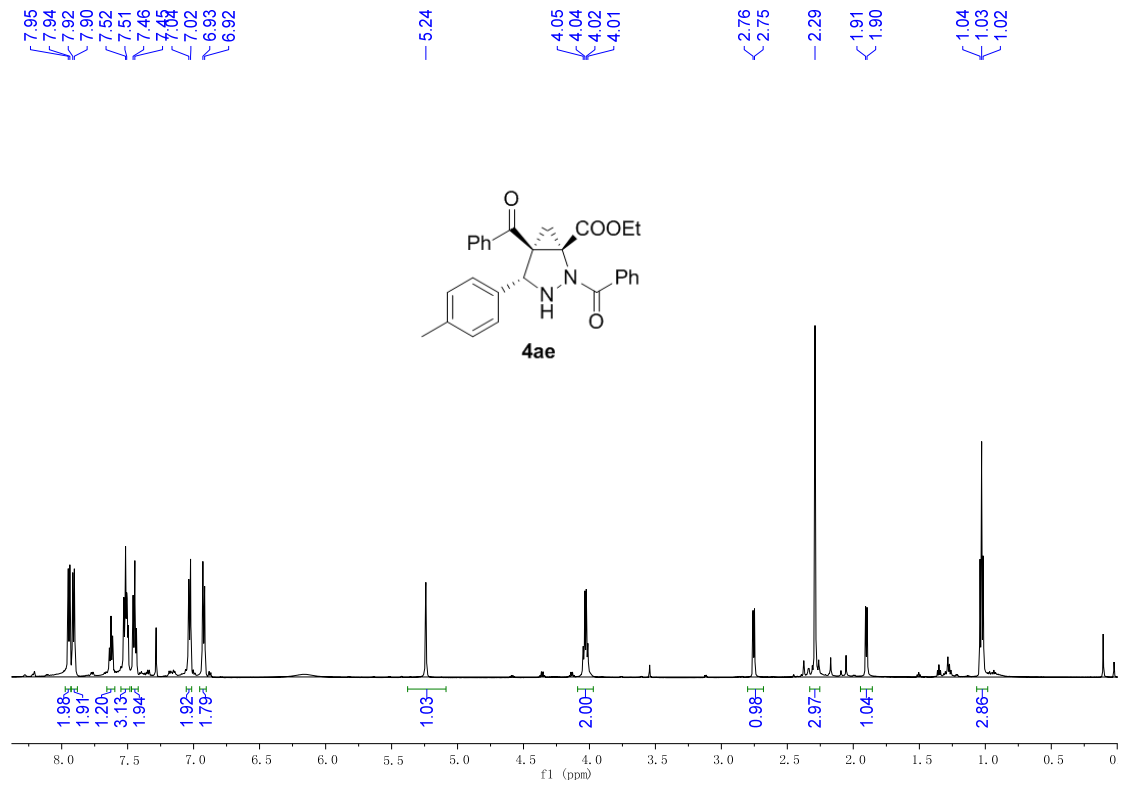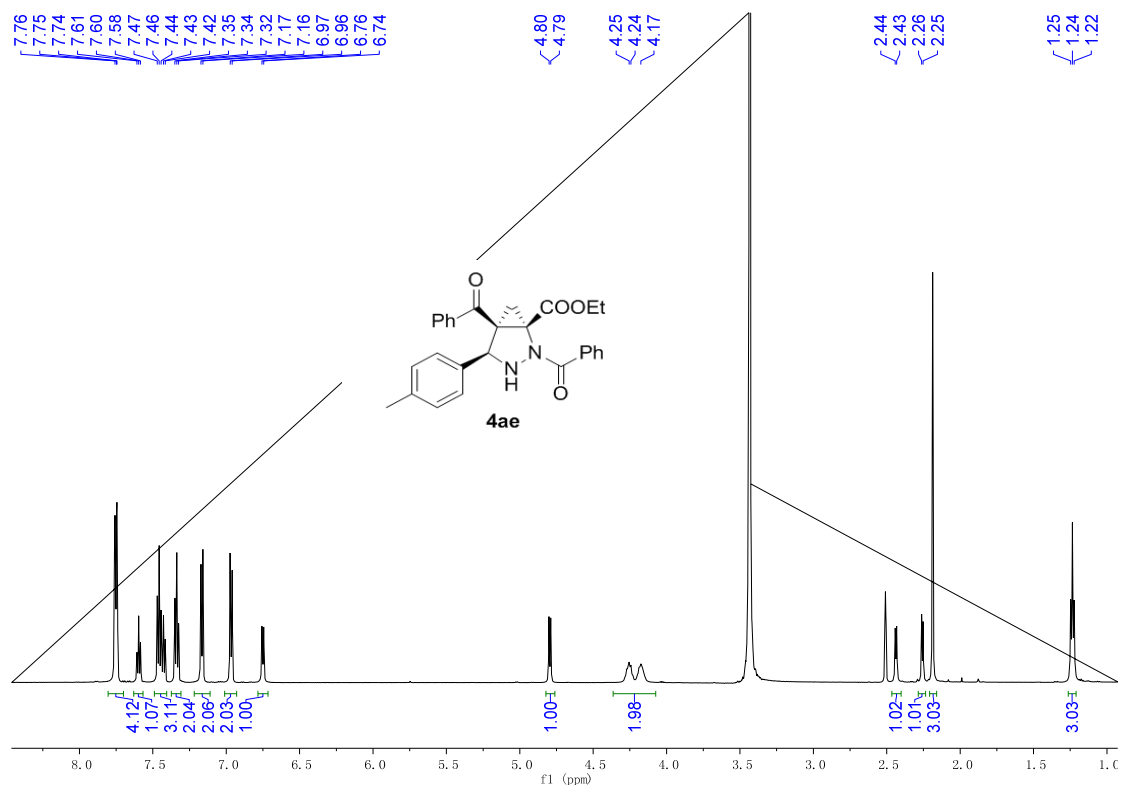

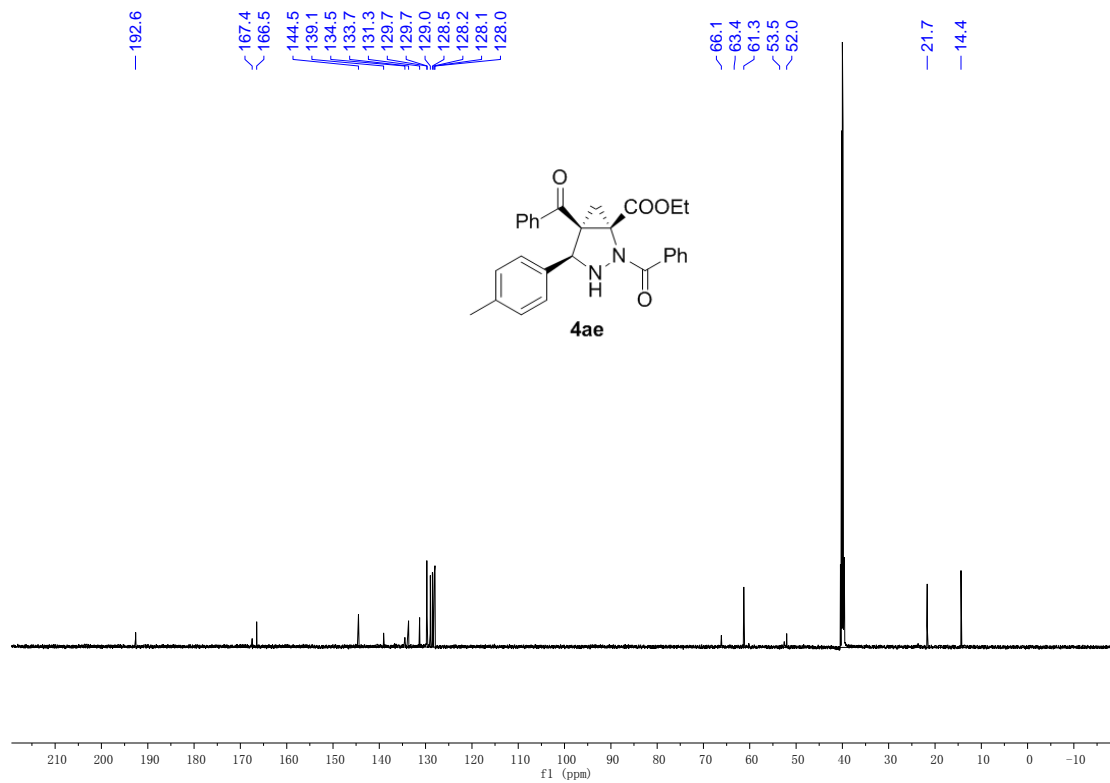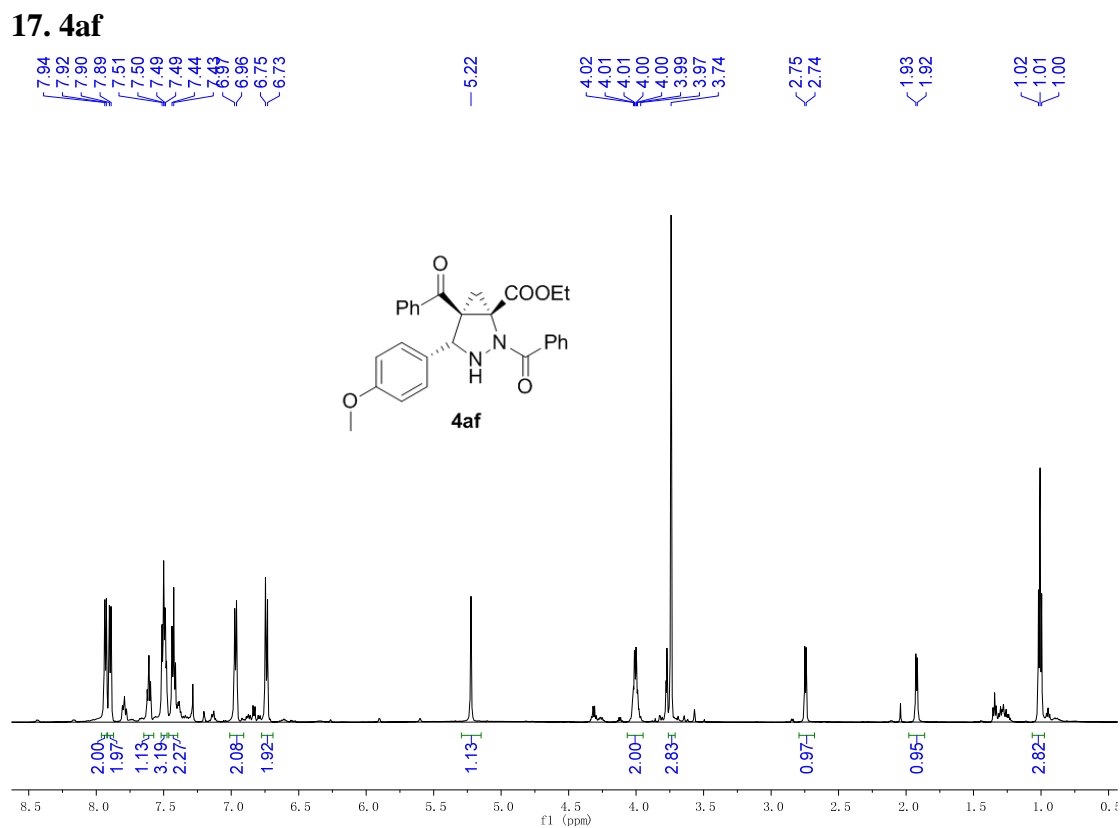

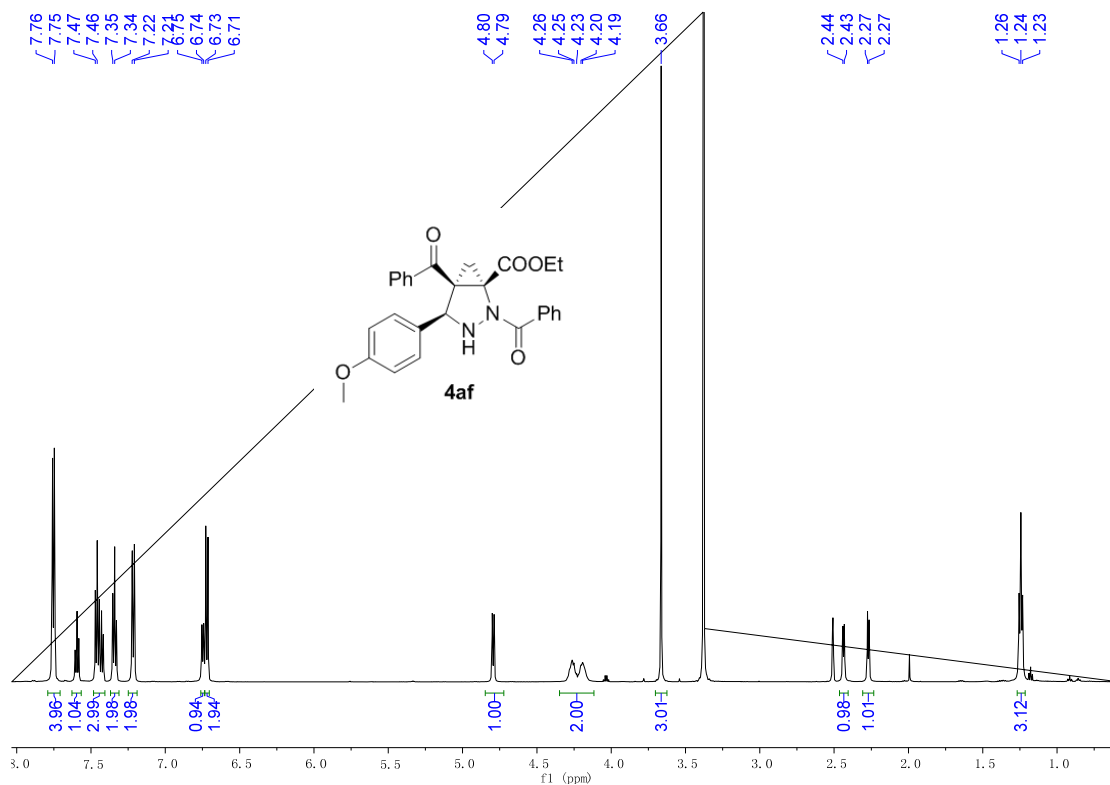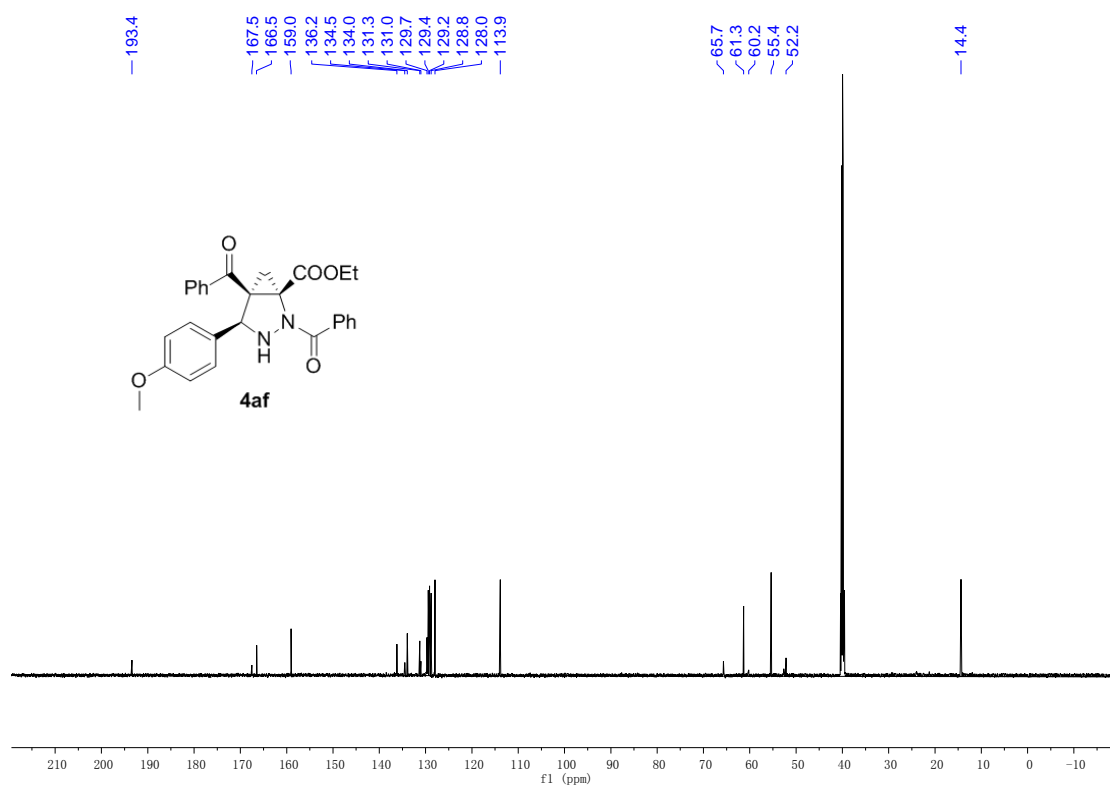

18.4ag

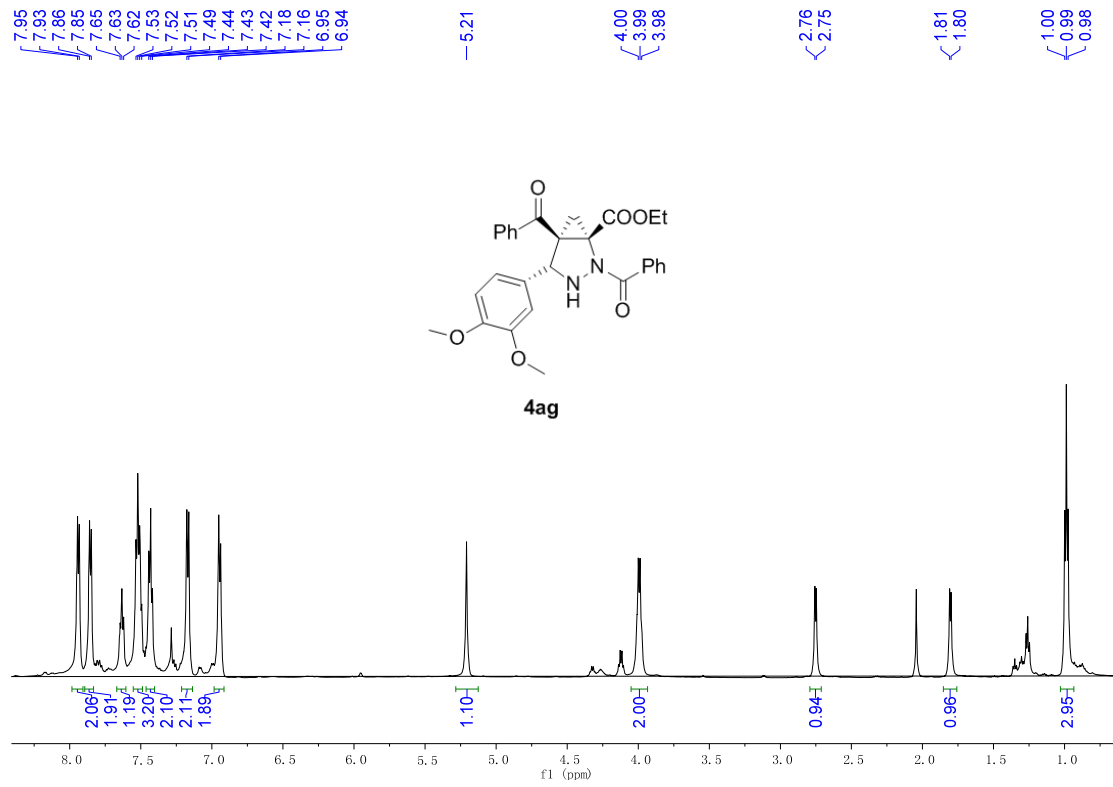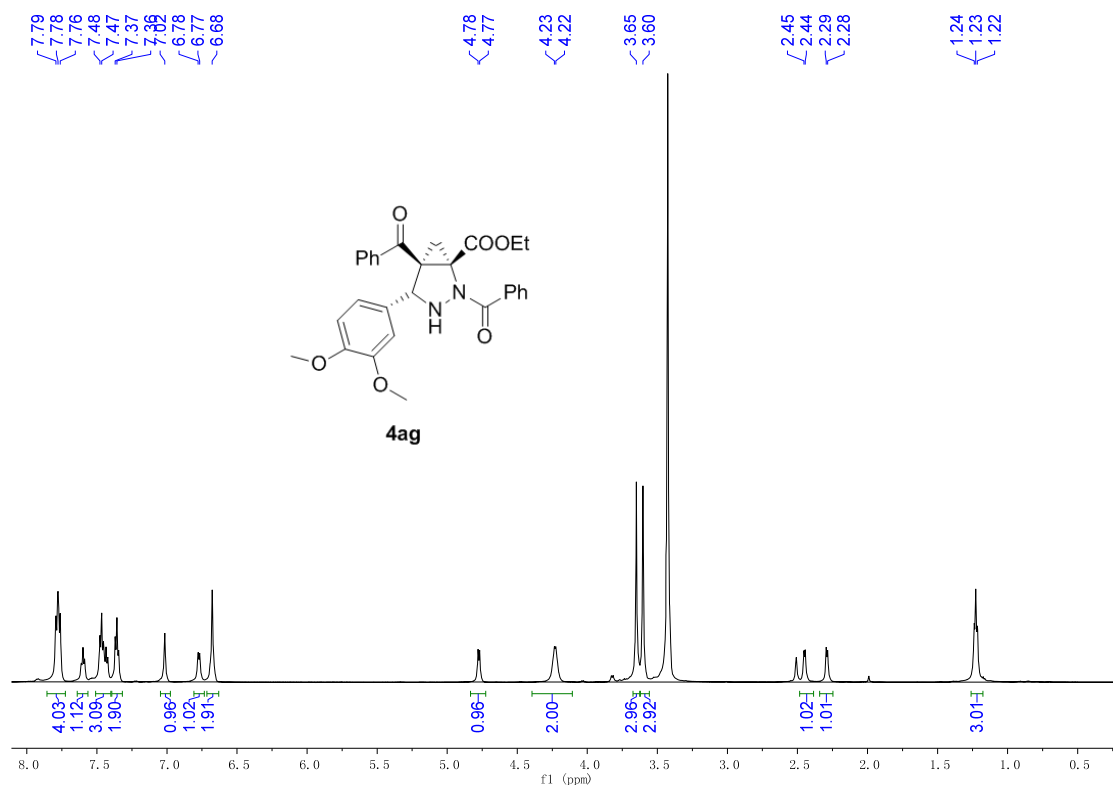



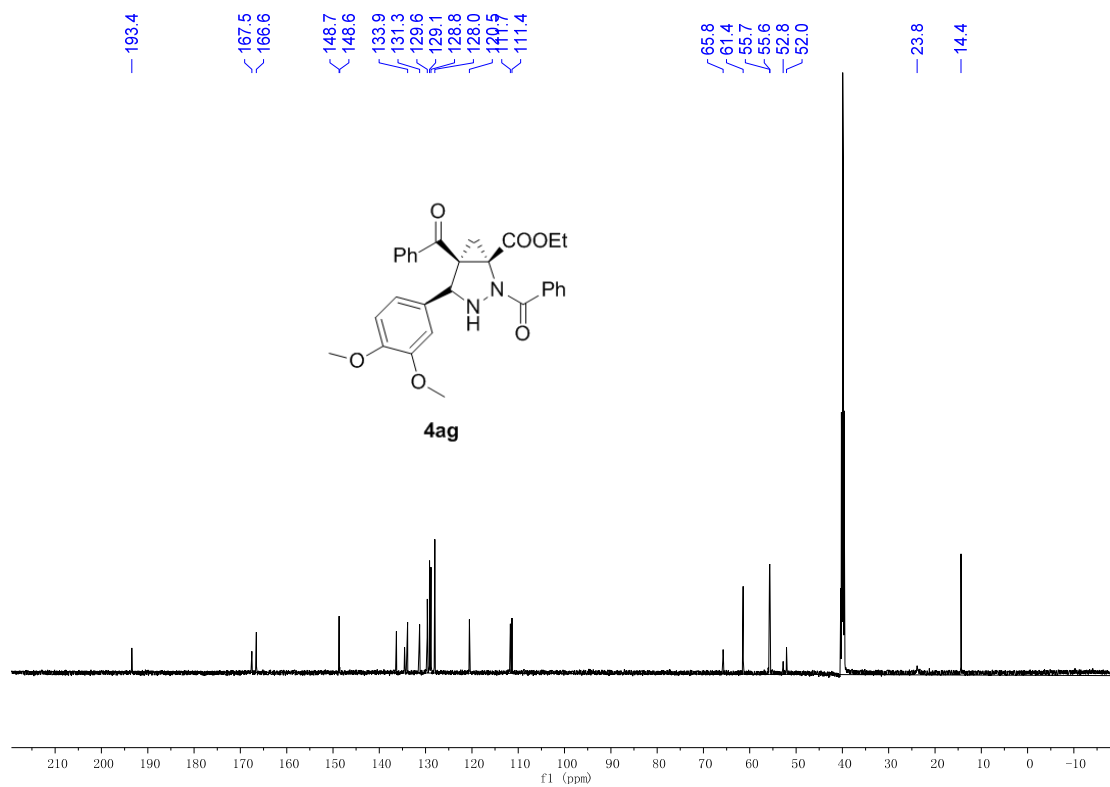

### 19. 4ah

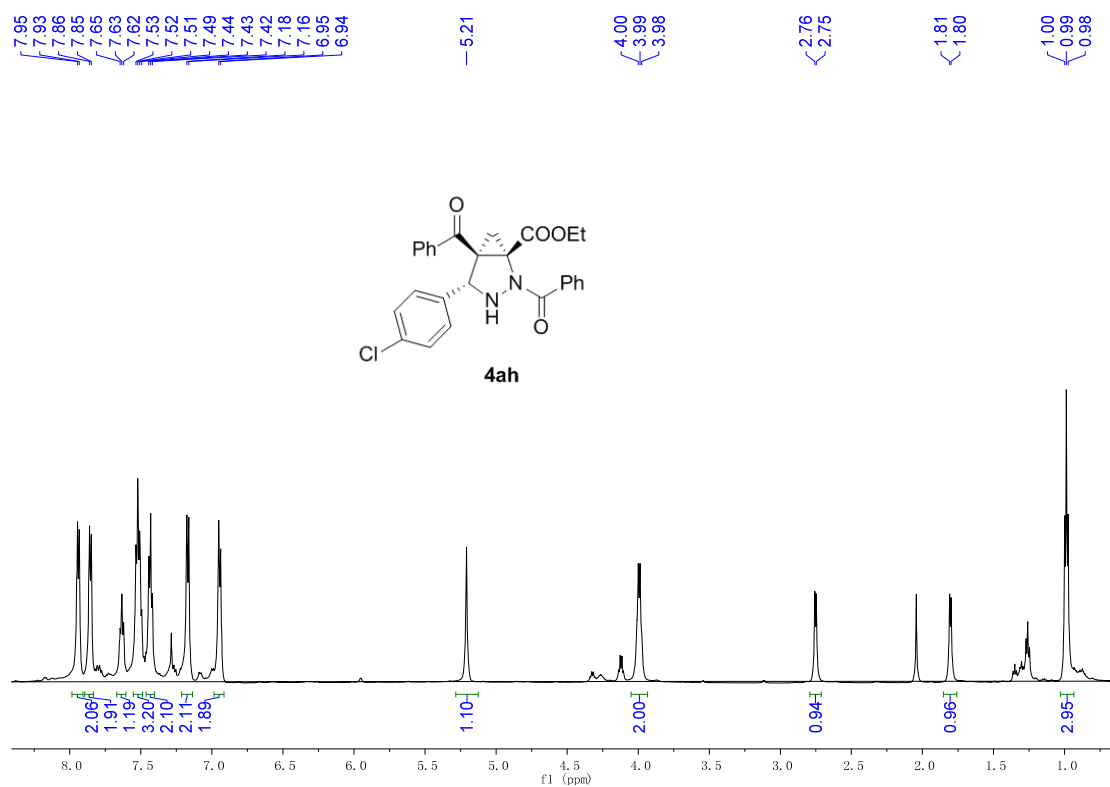

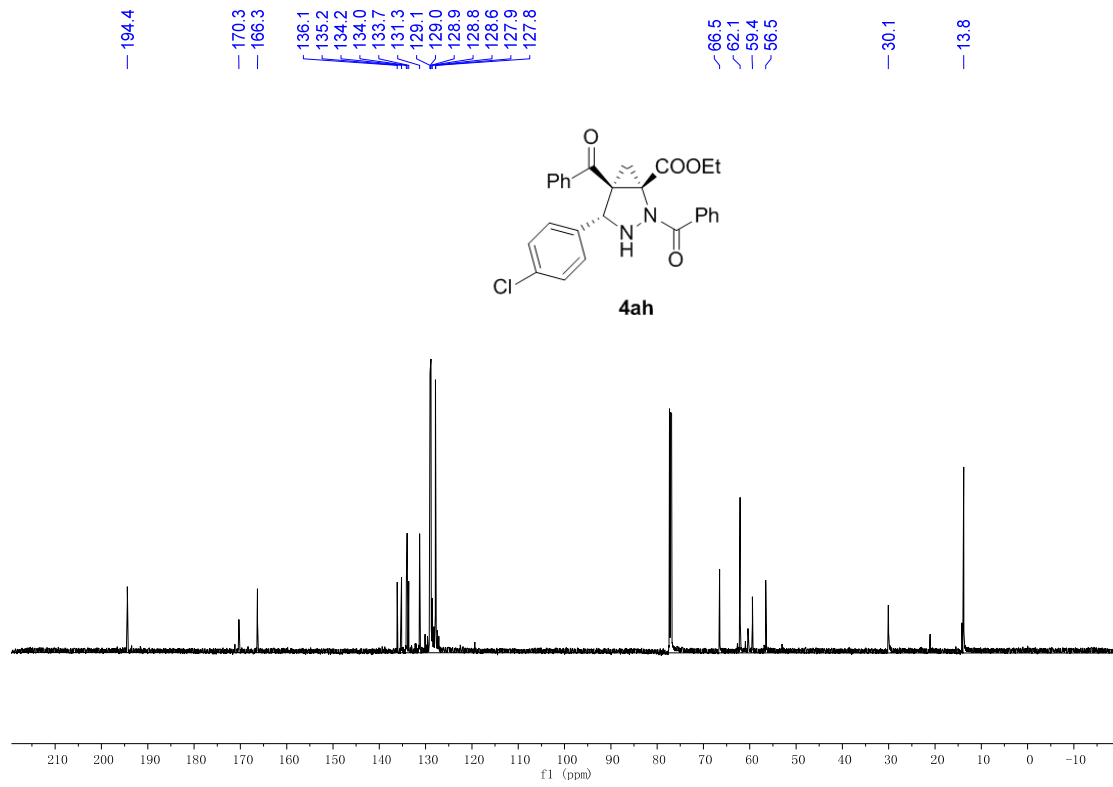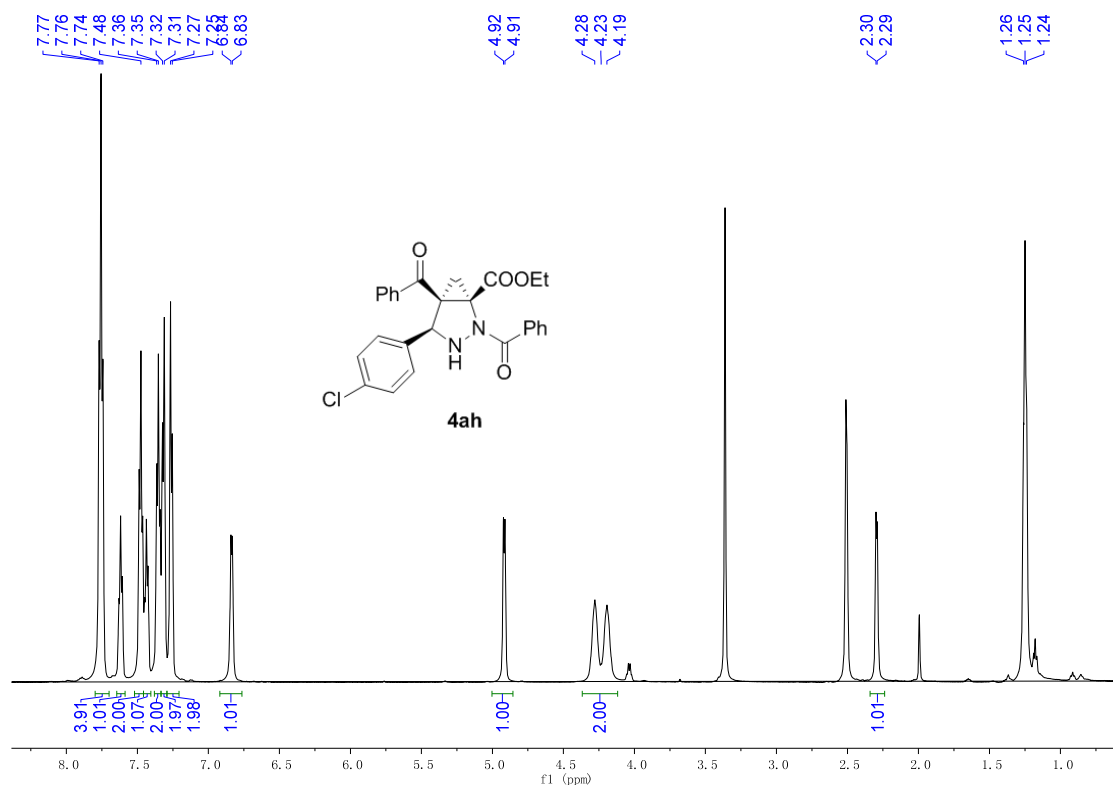

20. 4ai

7.90, 7.89, 7.79, 7.78, 7.77, 7.65, 7.64, 7.52, 7.51, 7.49, 7.45, 7.44, 7.42, 7.23, 7.23, 7.02, 7.02, -5.24, 4.05, 4.04, 4.03, 4.02, 2.71, 2.70, 1.92, 1.91, 1.06, 1.05, 1.04

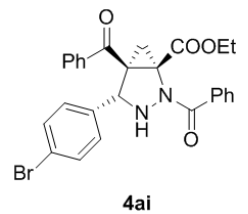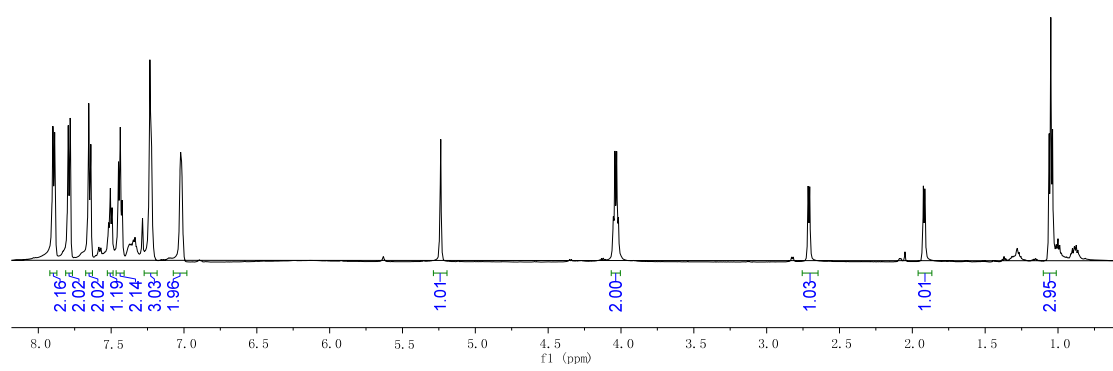

7.76, 7.75, 7.74, 7.47, 7.35, 7.30, 7.26, 6.83, 6.82, 4.91, 4.90, 4.27, 4.26, 4.19, 2.50, 2.49, 2.28, 2.28, 1.26, 1.24, 1.23

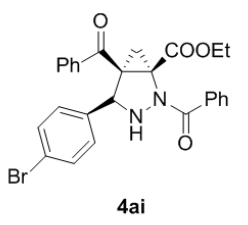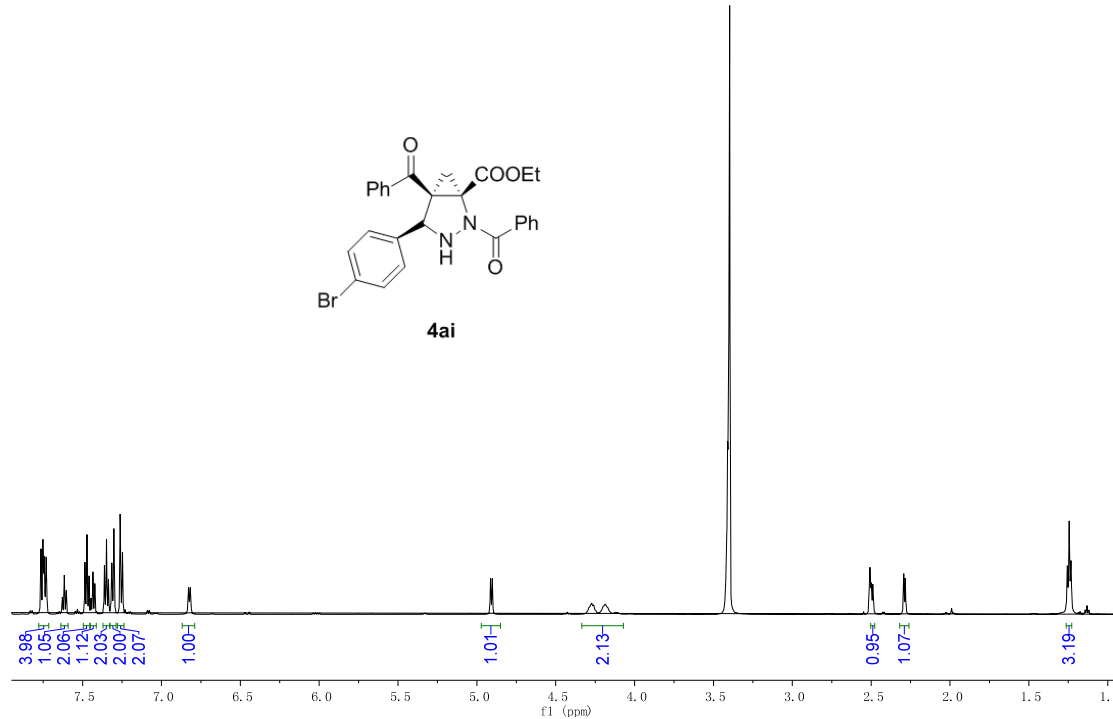

194.0  
170.0  
166.3  
137.1  
134.1  
132.3  
131.3  
130.5  
129.2  
129.1  
128.8  
128.0  
127.9  
126.3  
67.0  
62.2  
58.9  
55.9  
29.0  
13.9

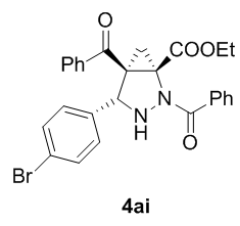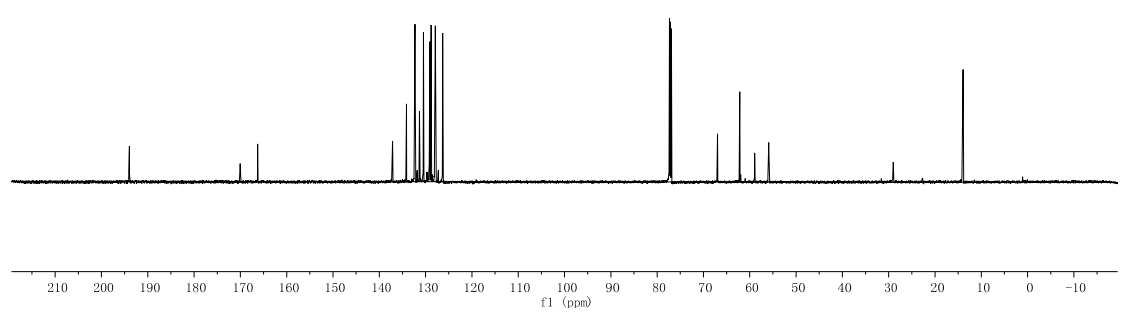

**21. 4aj**

7.99  
7.98  
7.87  
7.86  
7.61  
7.51  
7.50  
7.48  
7.47  
7.43  
7.41  
7.40  
7.38  
6.20  
6.19  
5.83  
5.83  
5.13  
5.12  
4.12  
4.12  
4.11  
4.11  
4.10  
4.09  
2.76  
2.75  
2.05  
2.04  
1.11  
1.10  
1.09

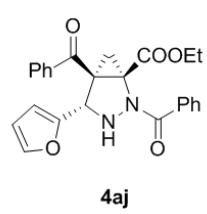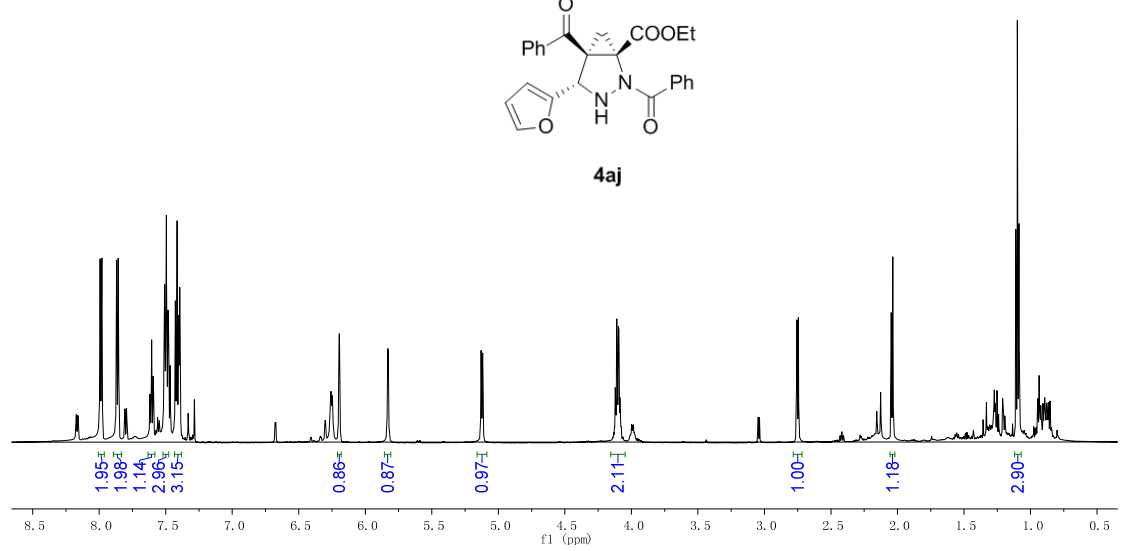

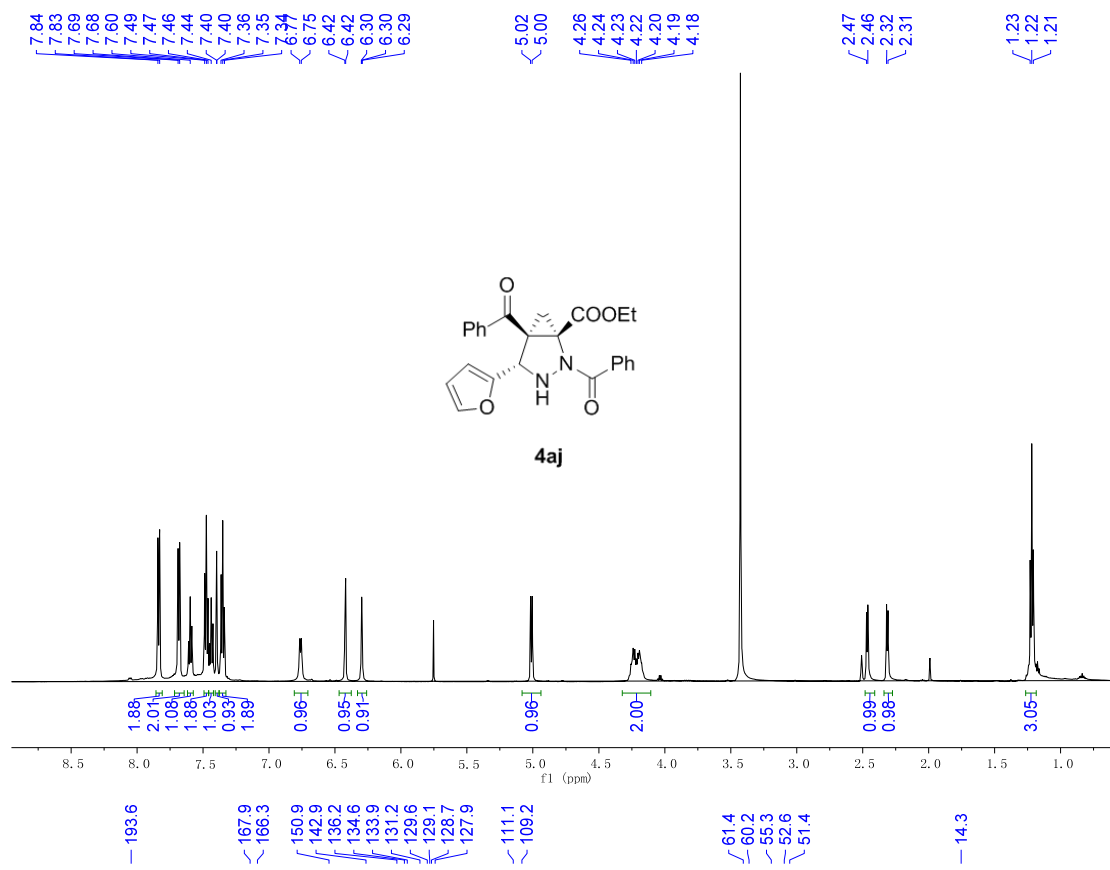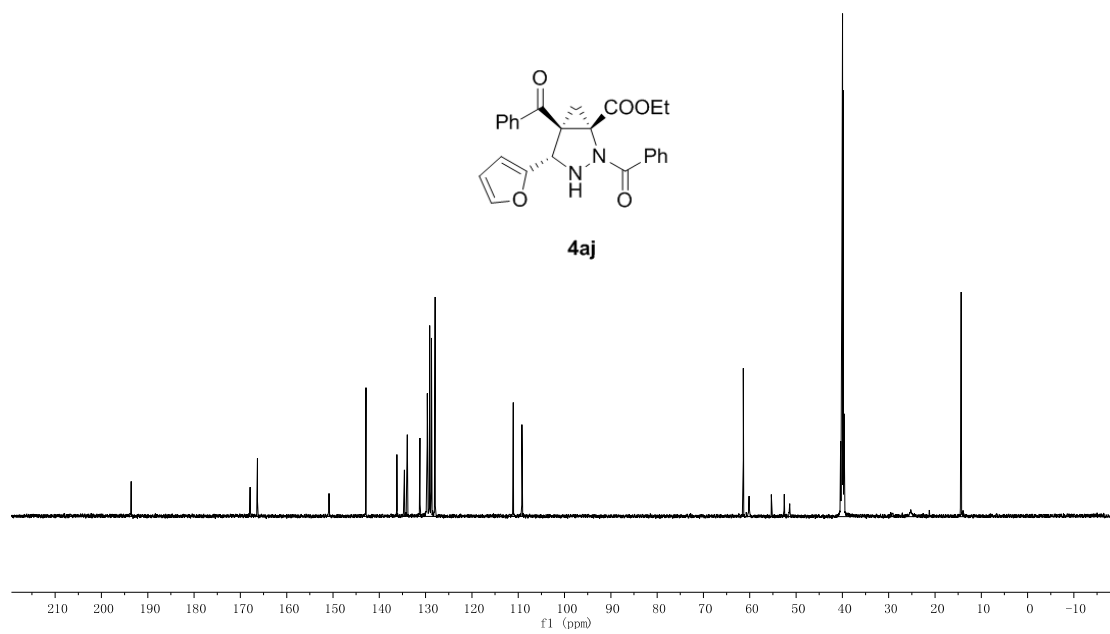

**22. 4ak**

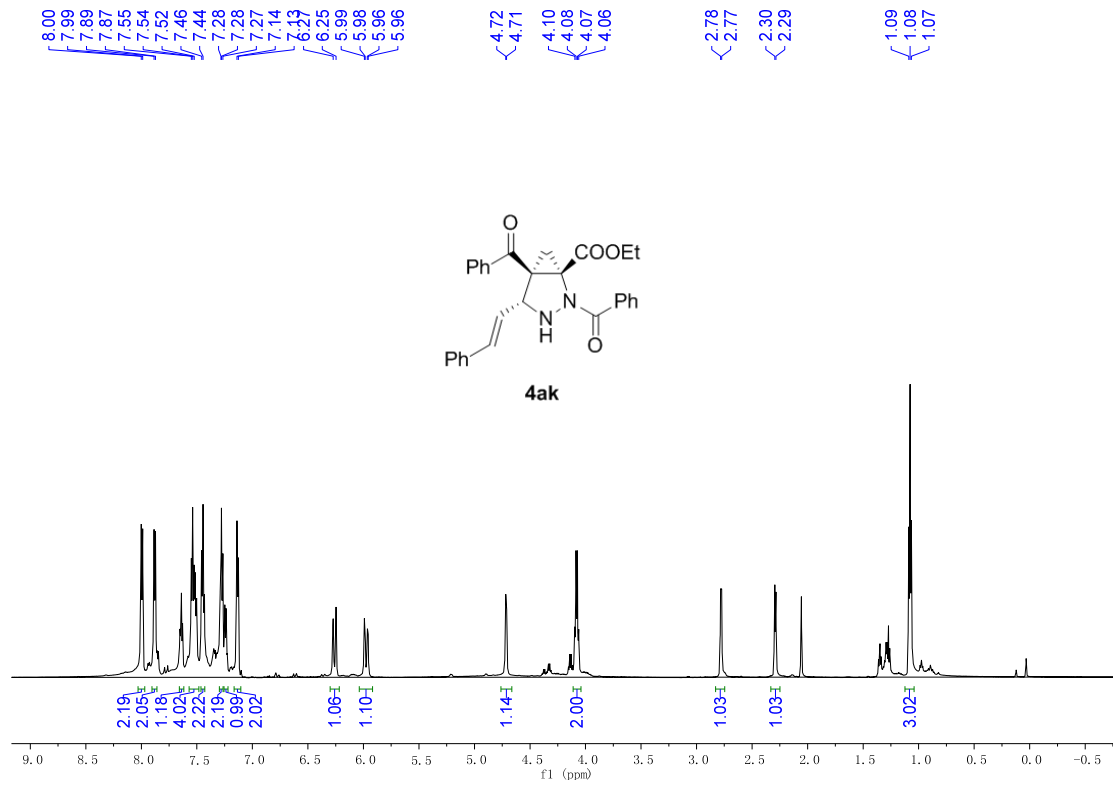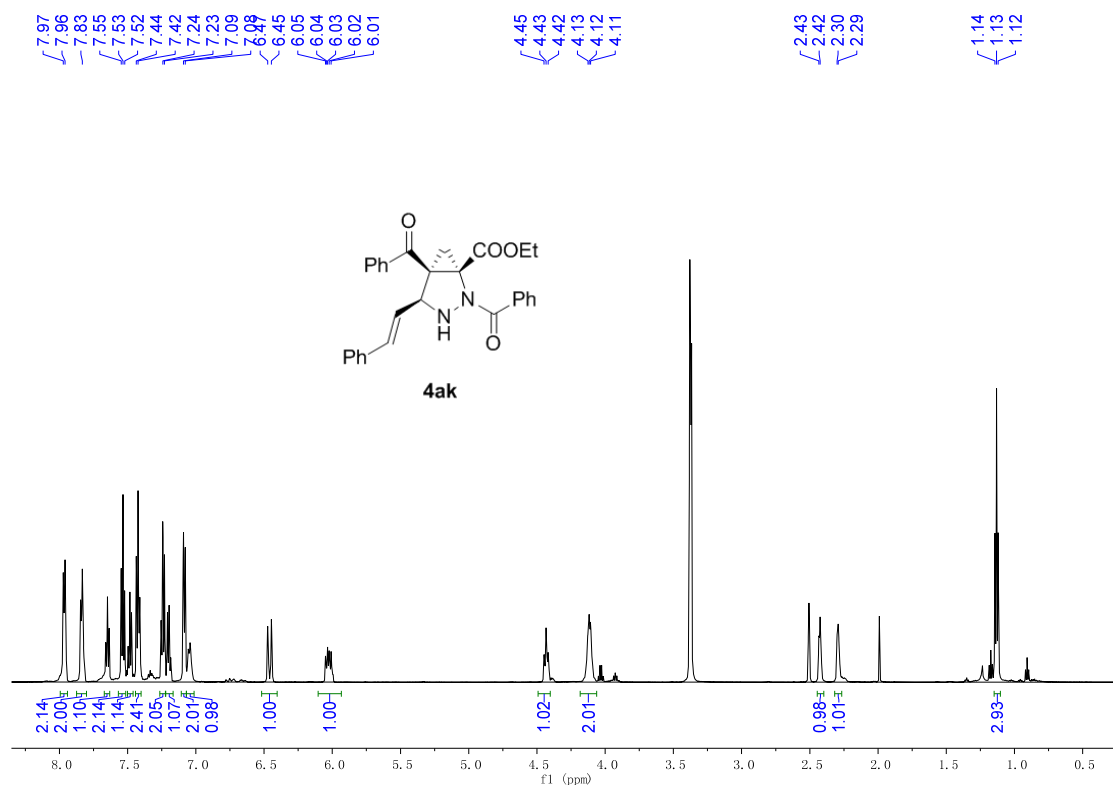

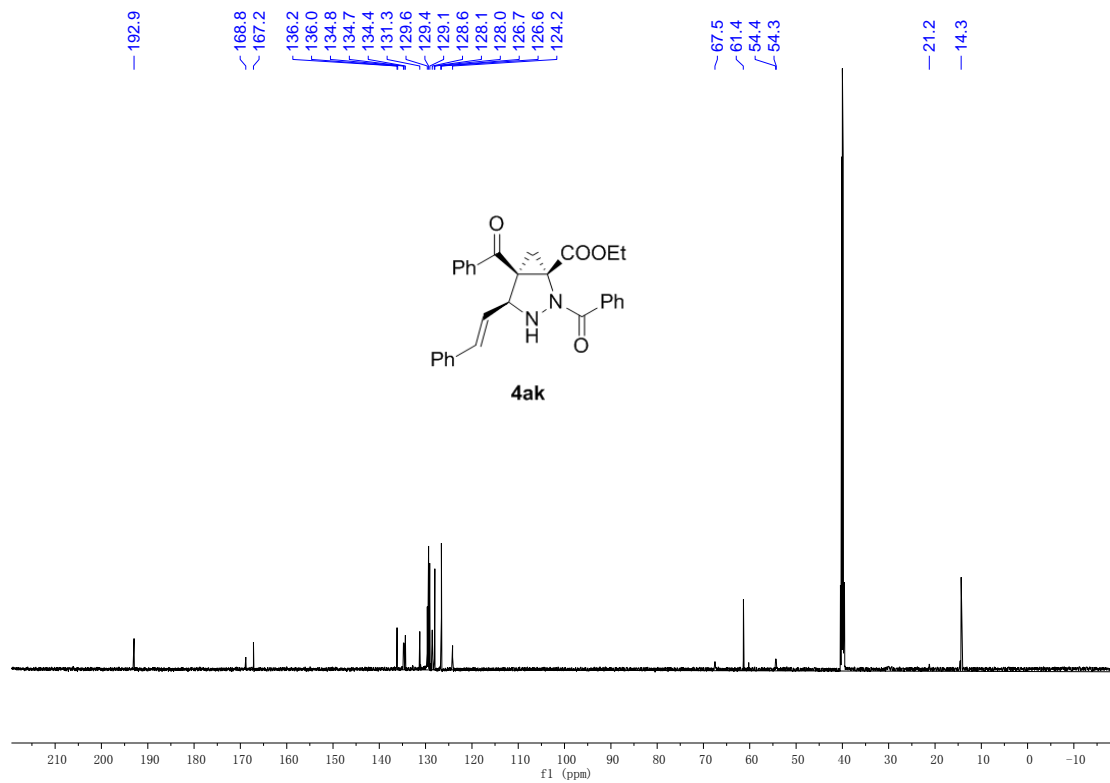

### 23. 5aa

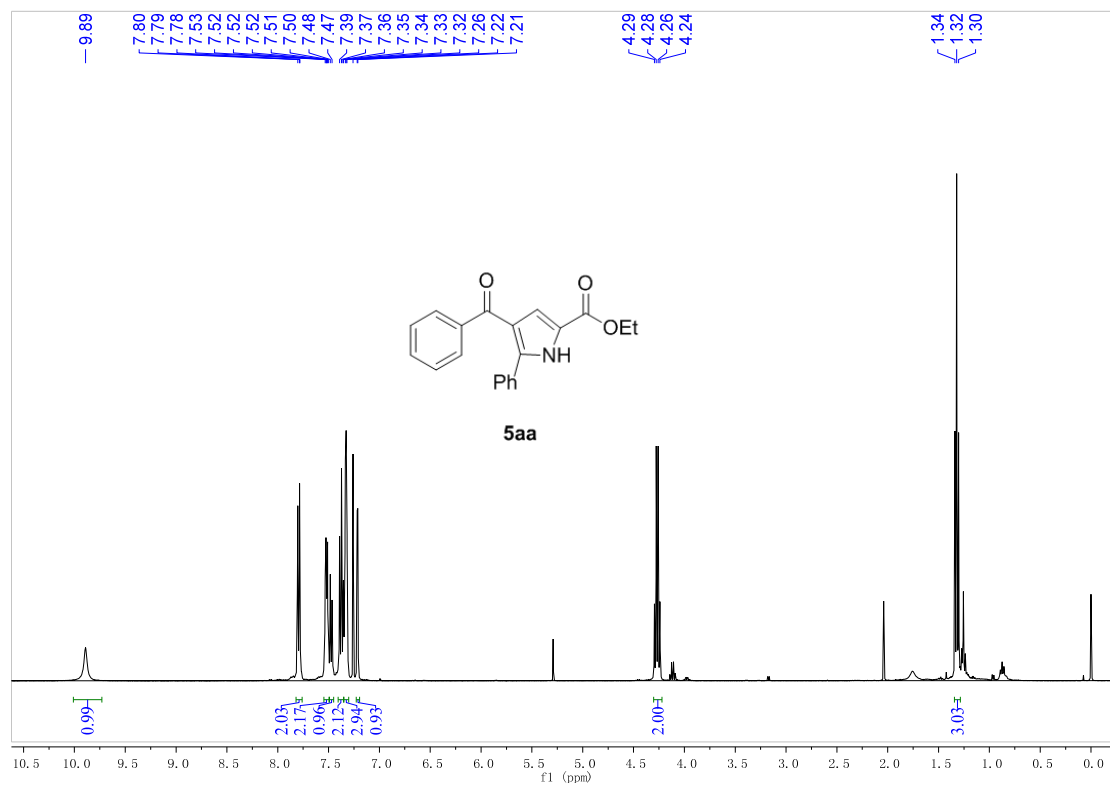

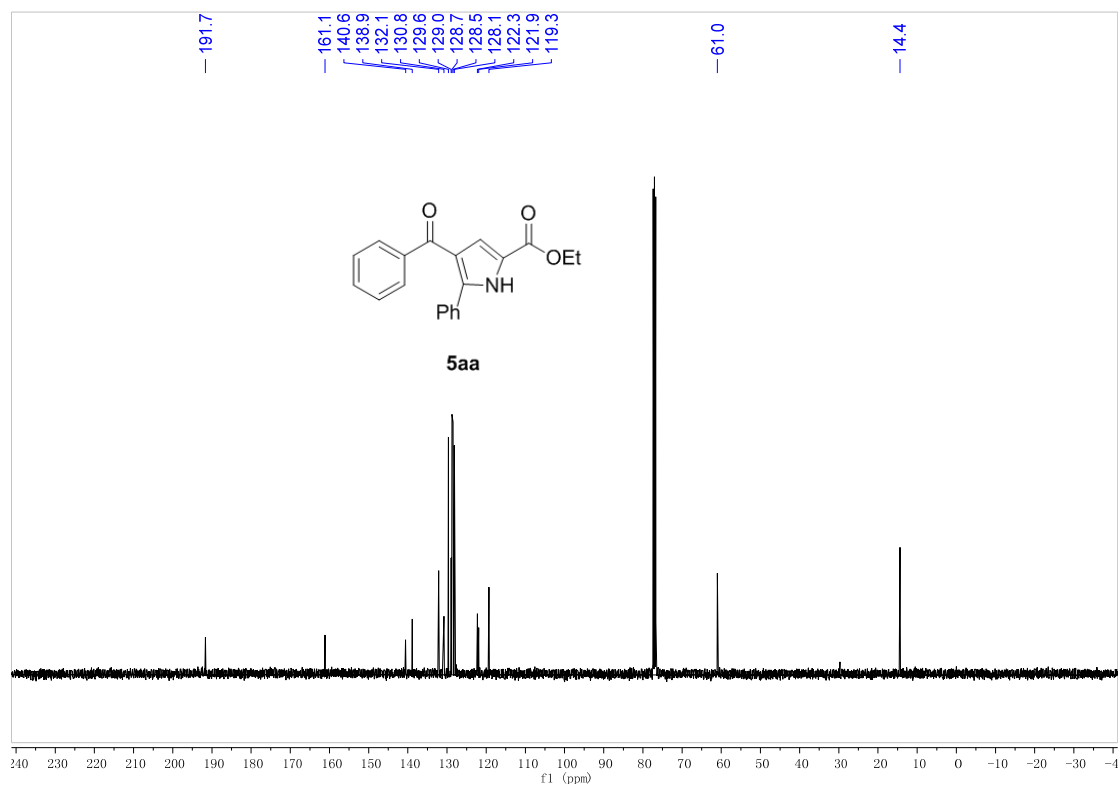

## 24. 5ba

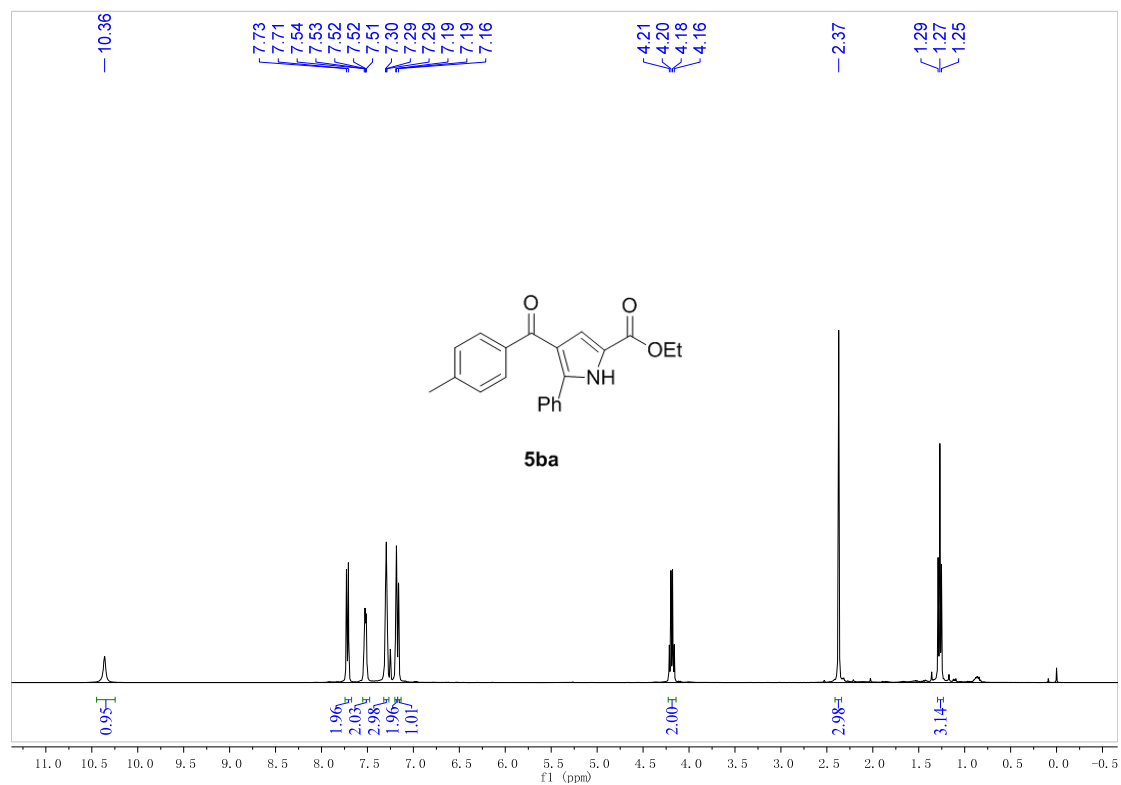



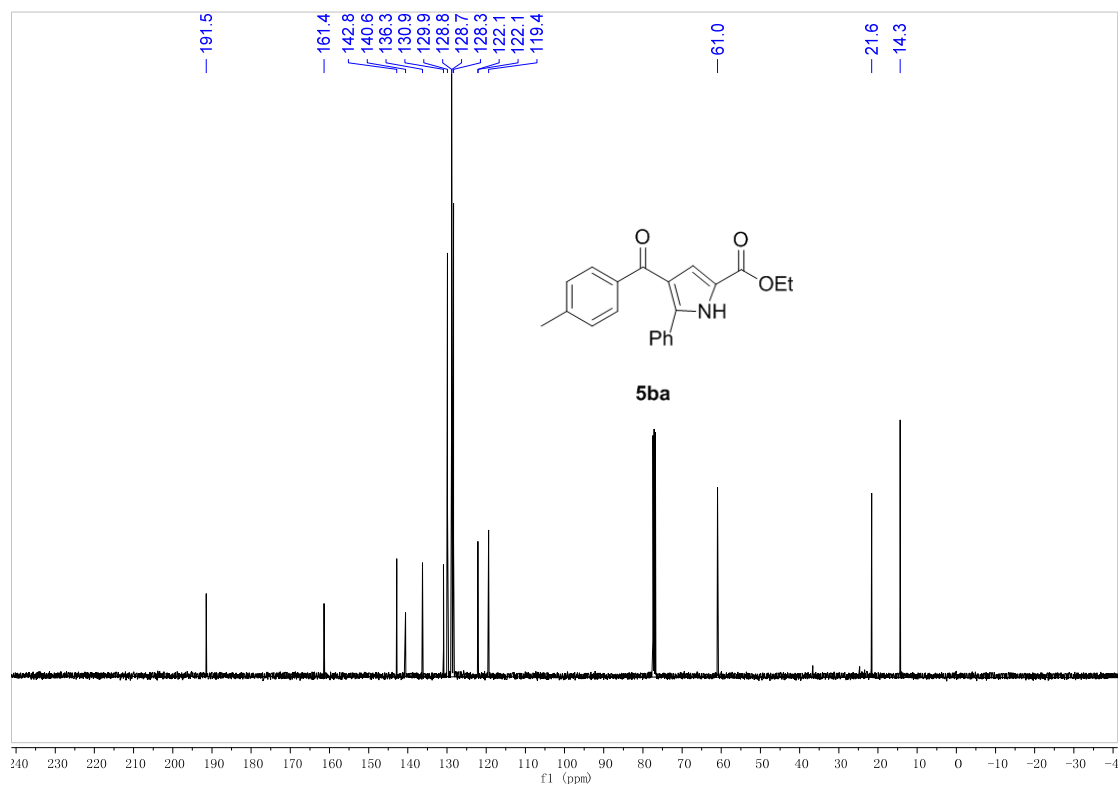

## 25. 5ca

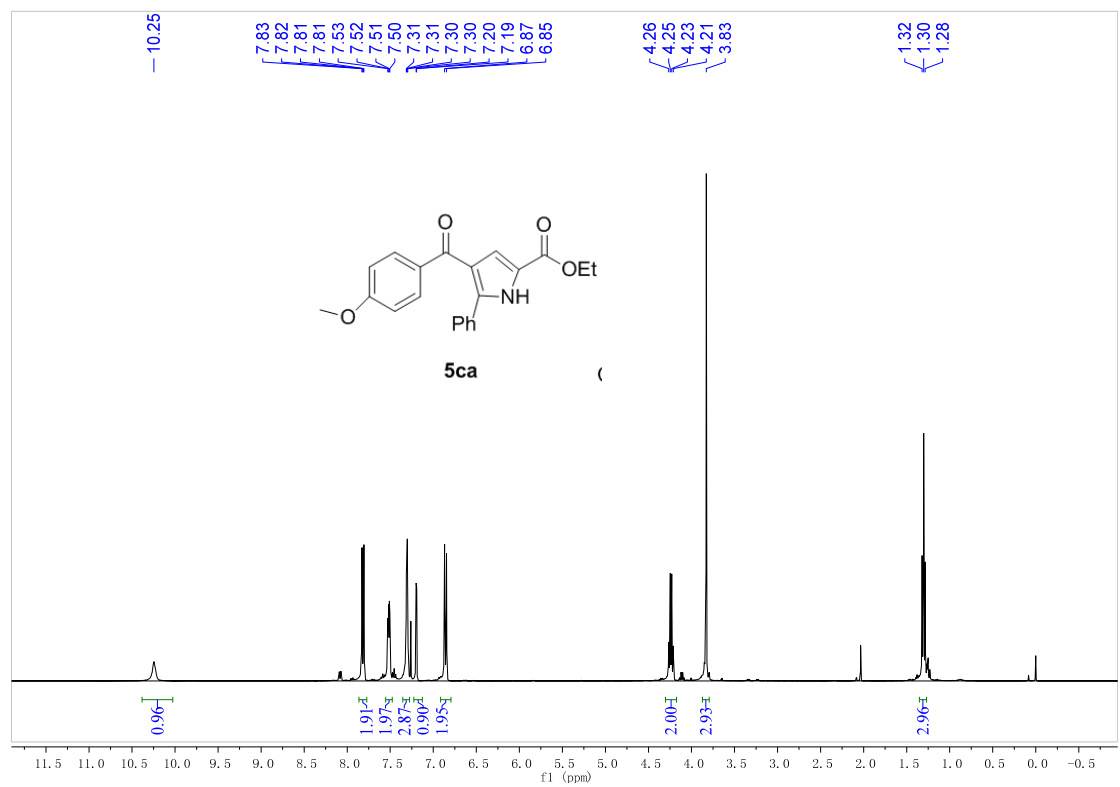

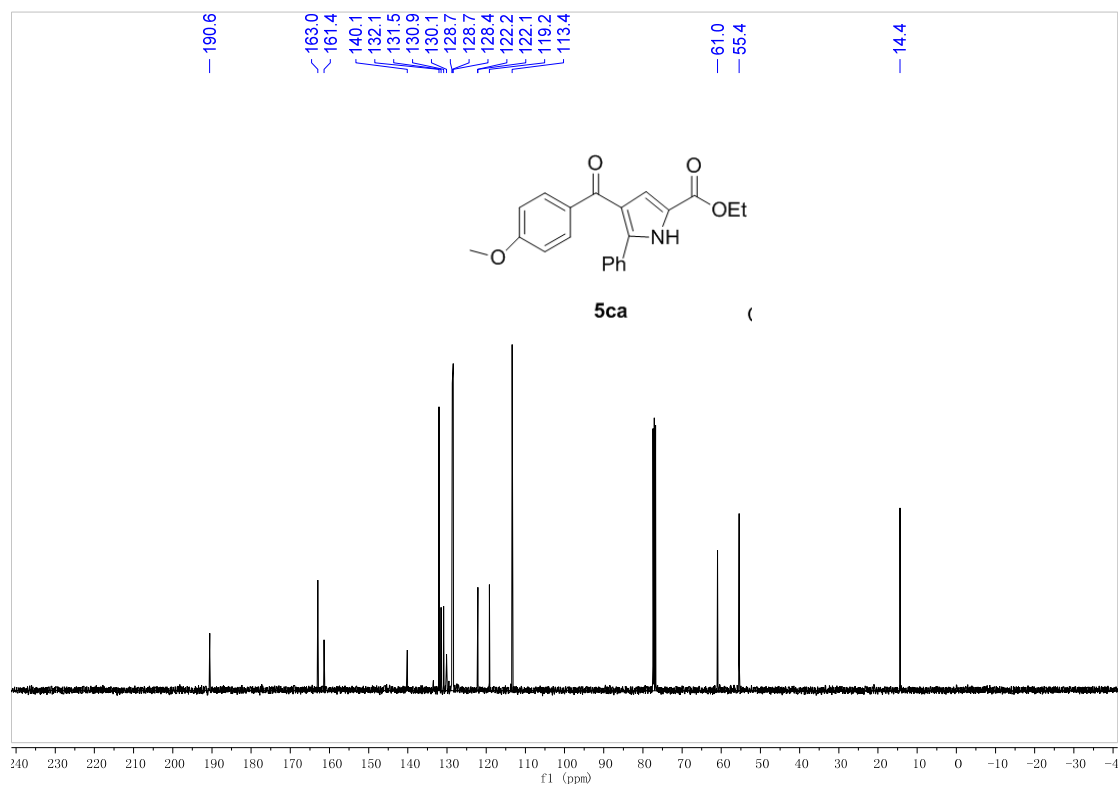

## 26. 5da

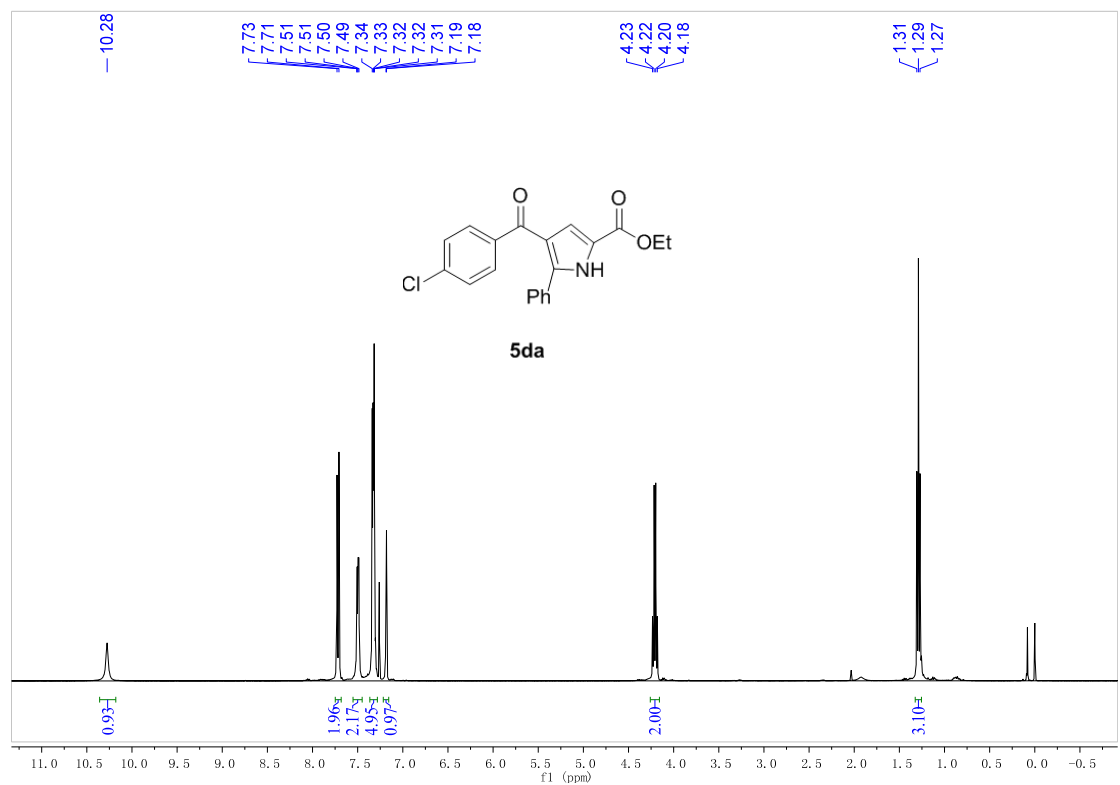

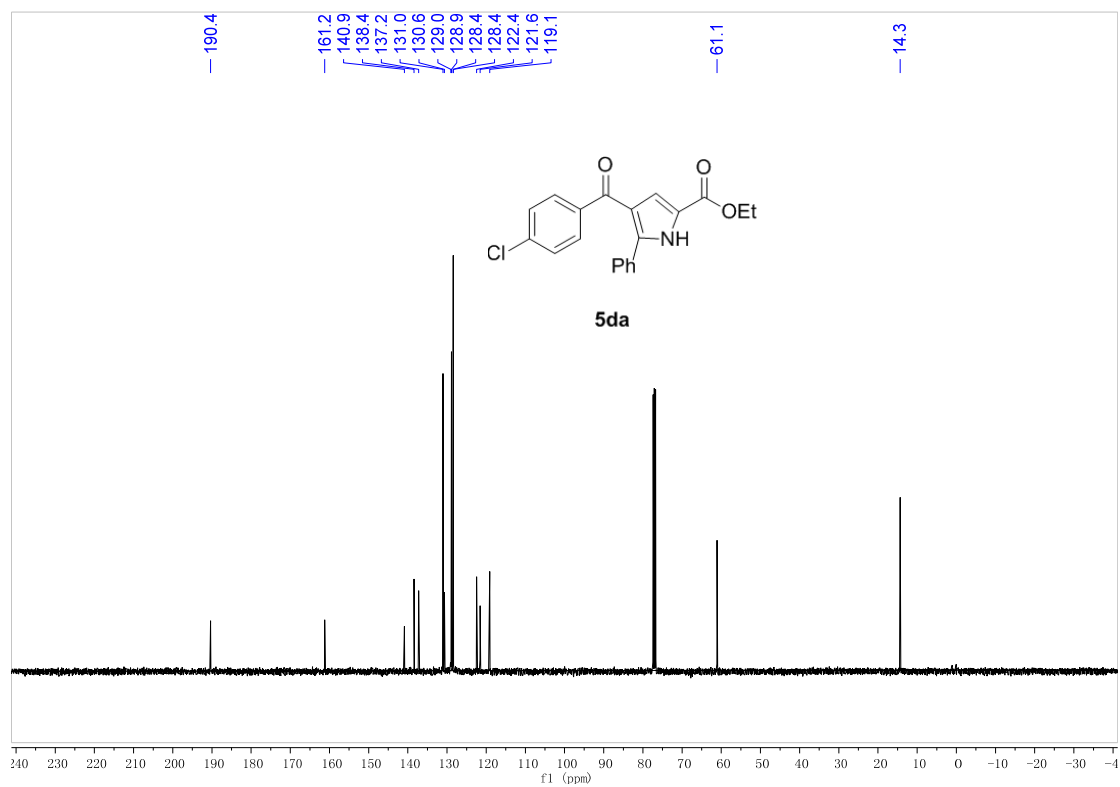

### 27. 5ea

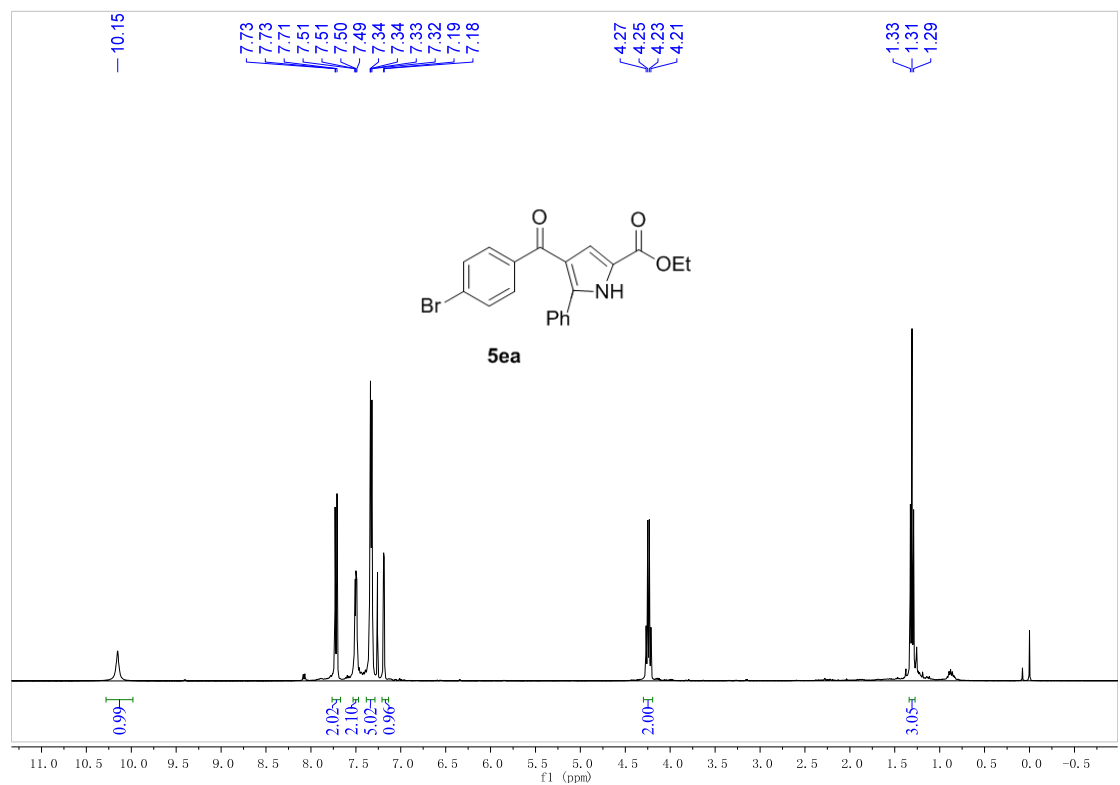

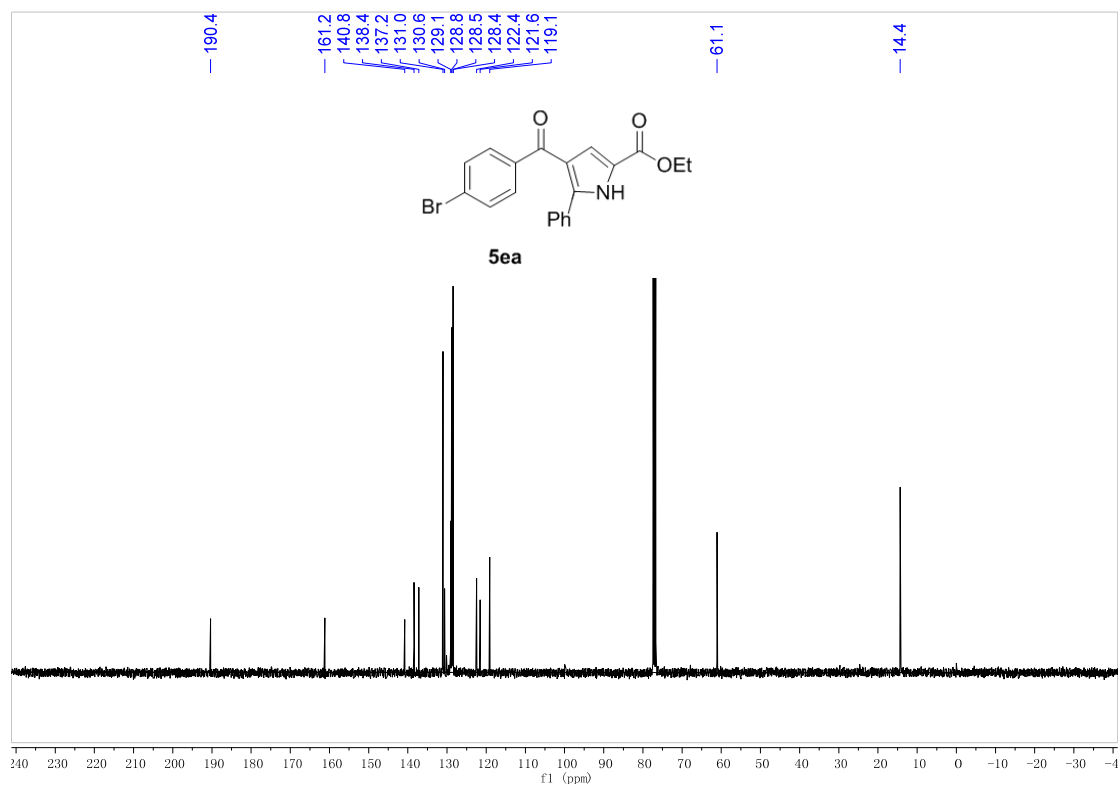

**28. 5fa**

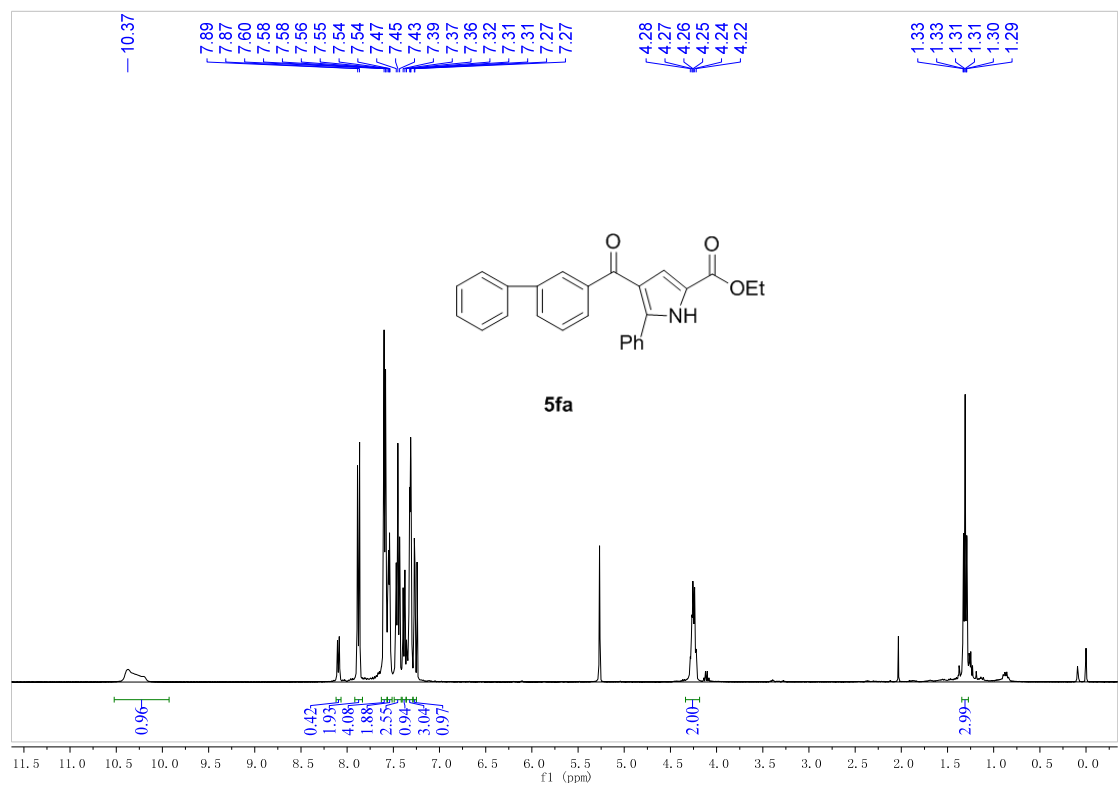

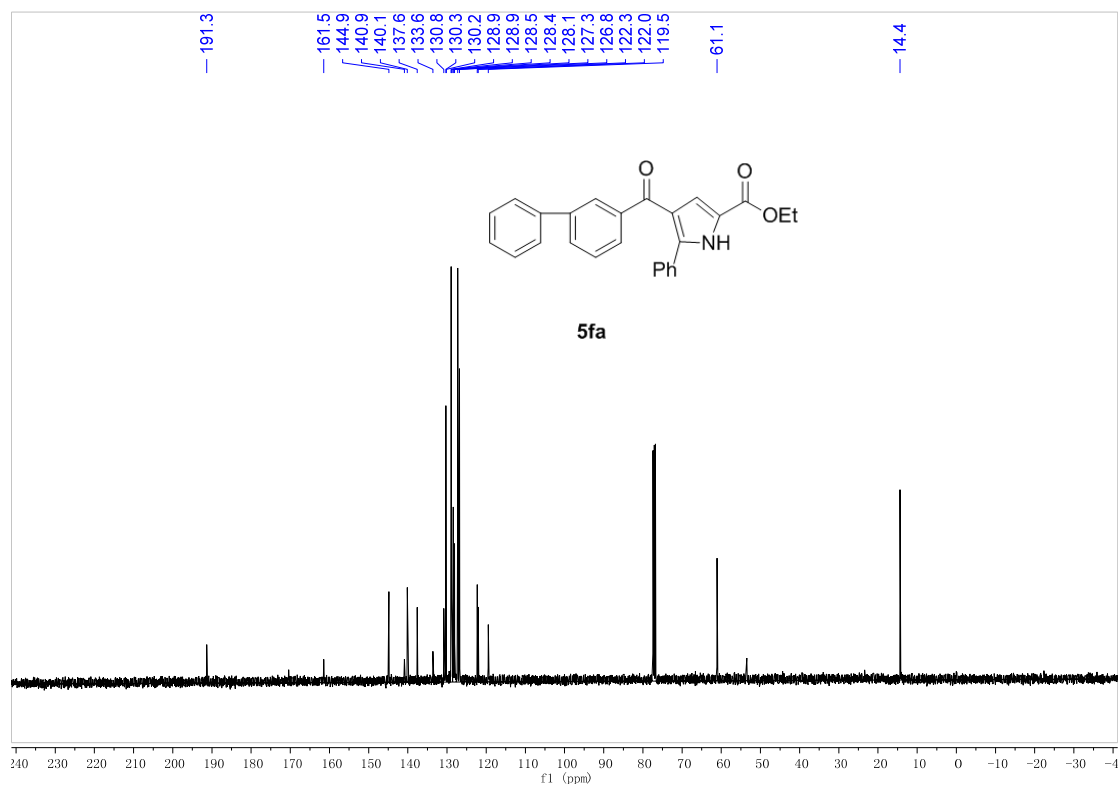

## 29. 5ga

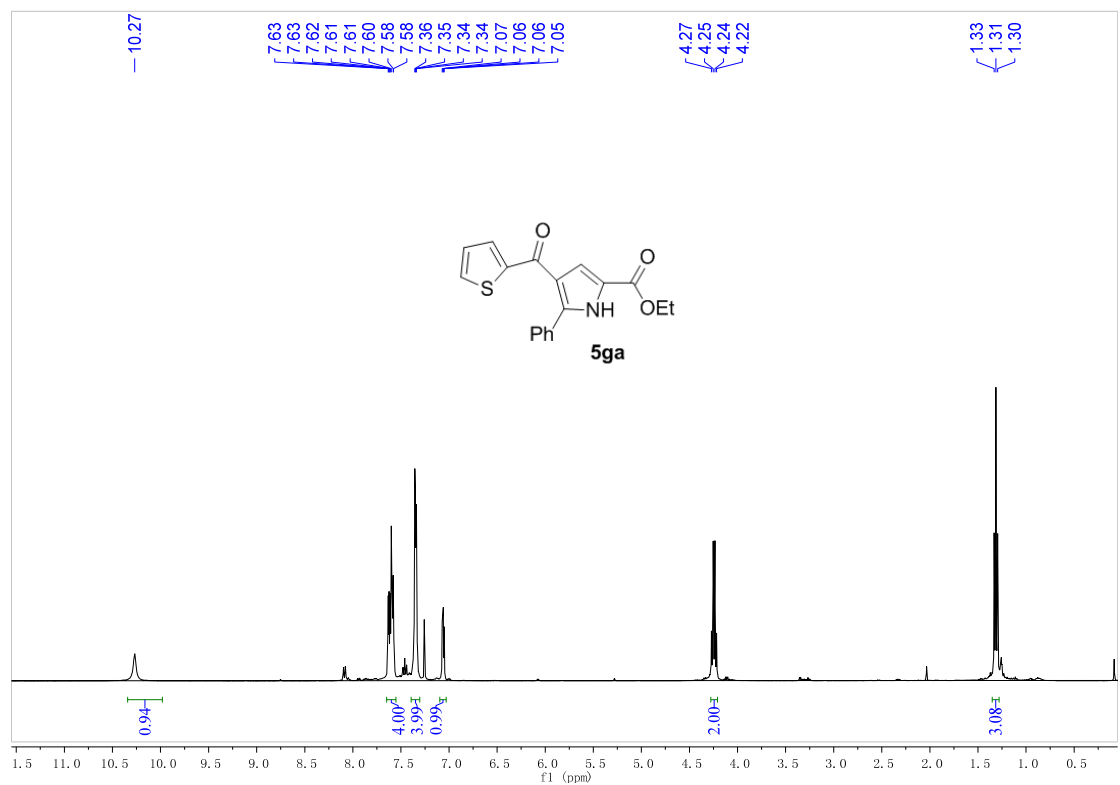

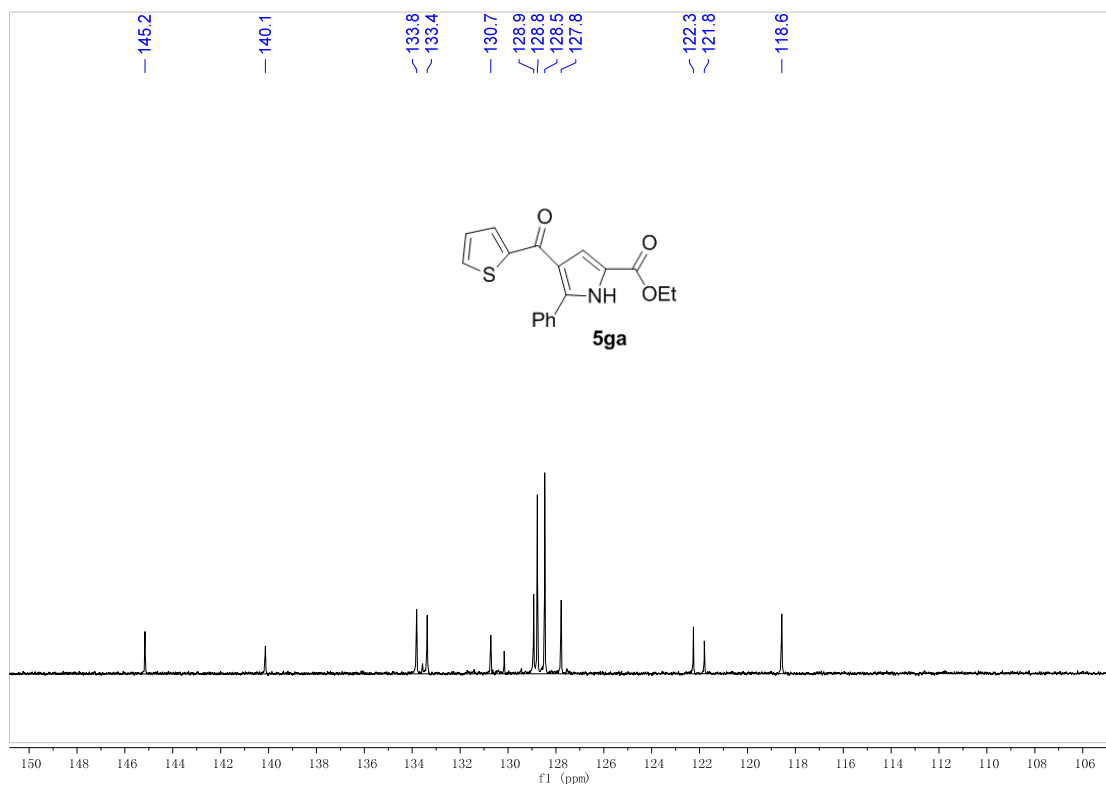

### 30. 5ha

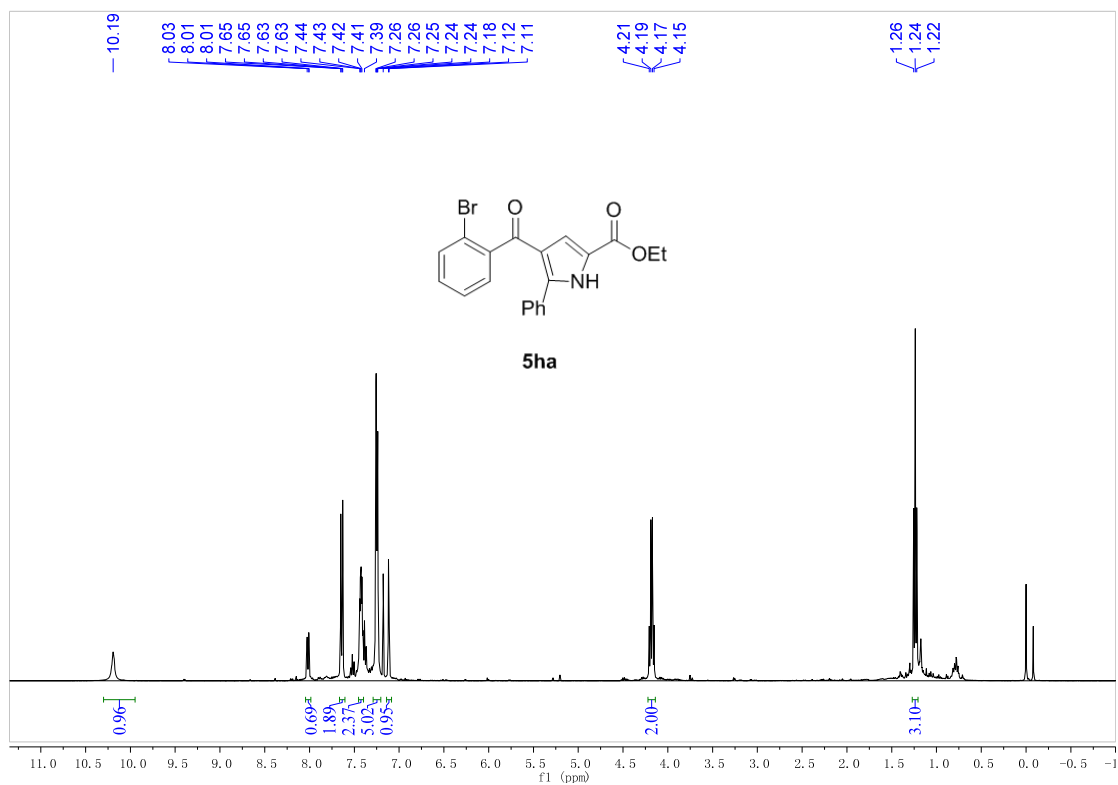

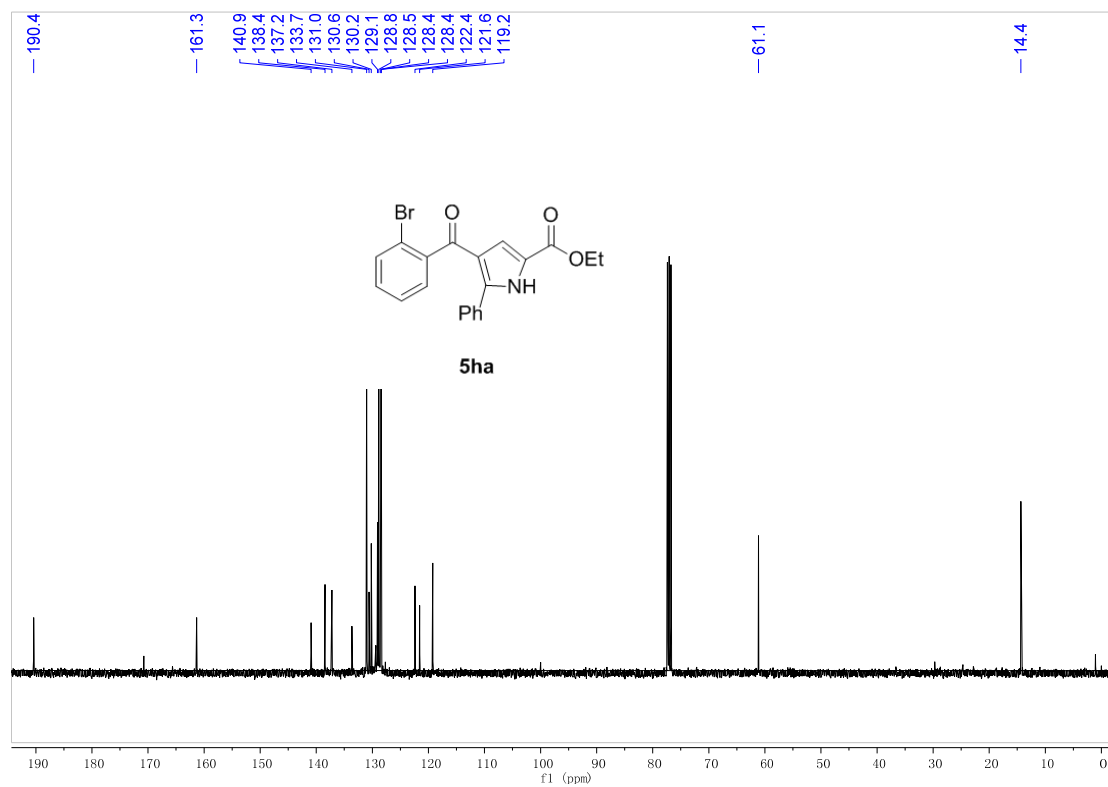

### 31.5ia

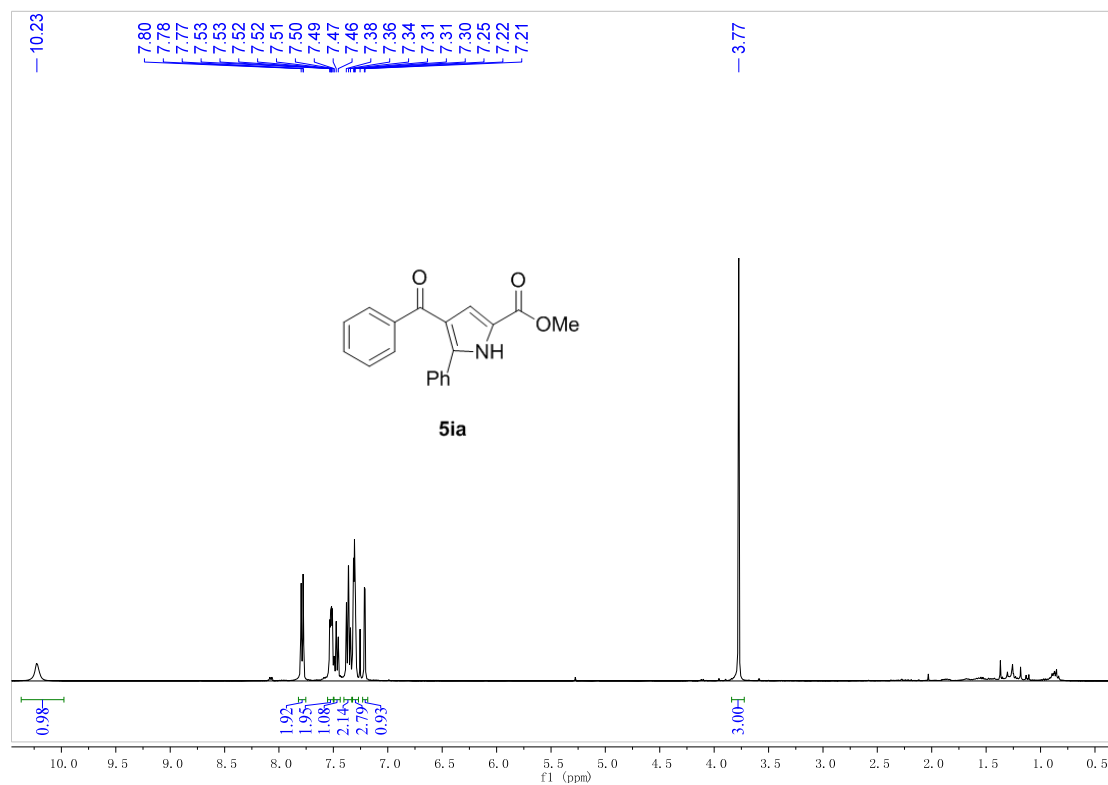

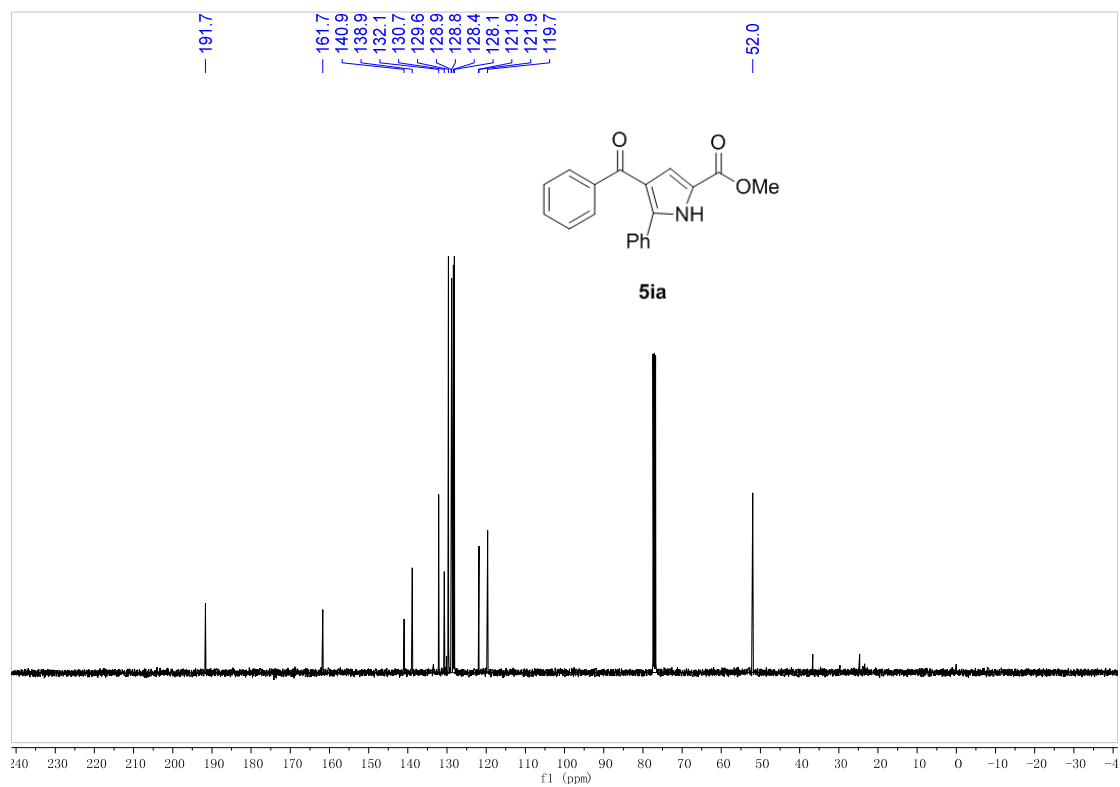

### 32. 5ab

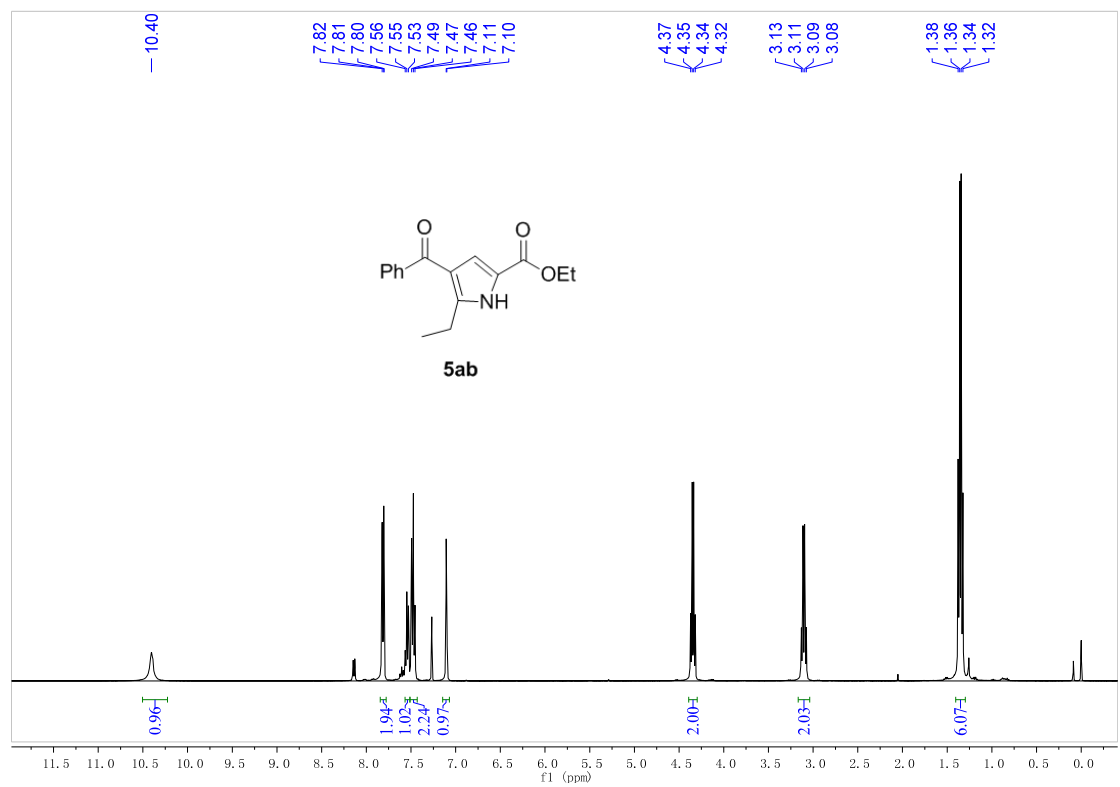



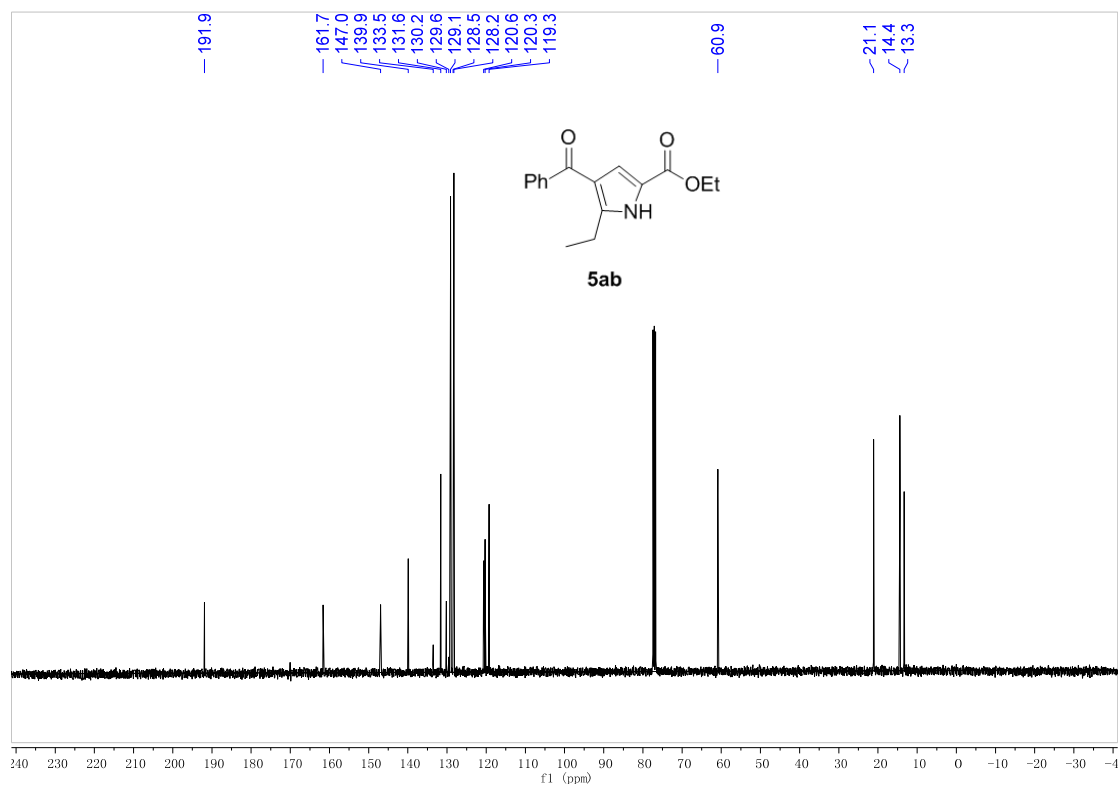

### 33. 5ae

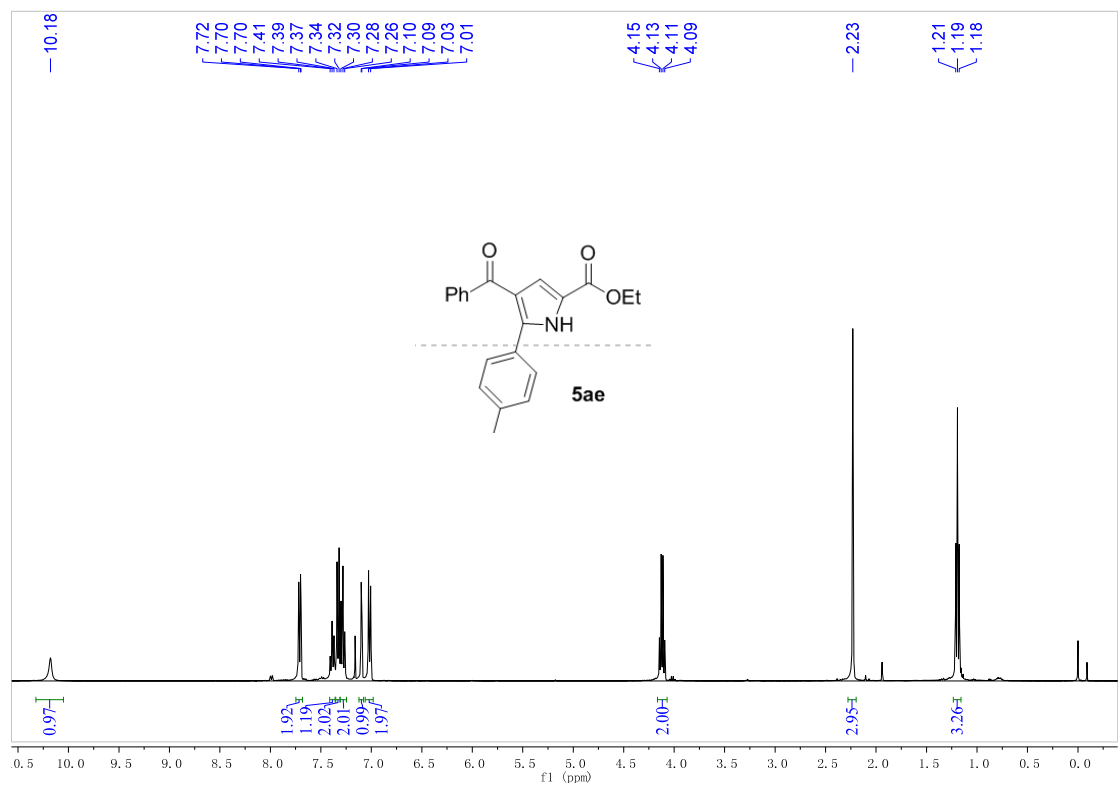

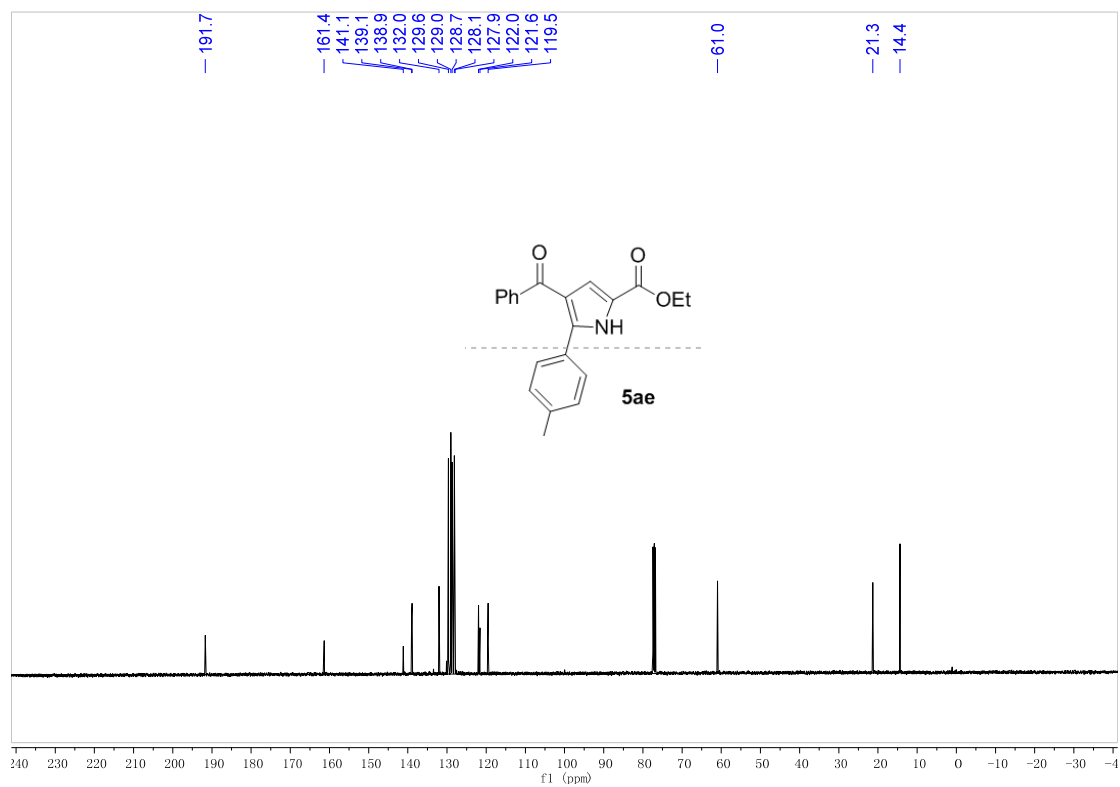

### 34. 5af

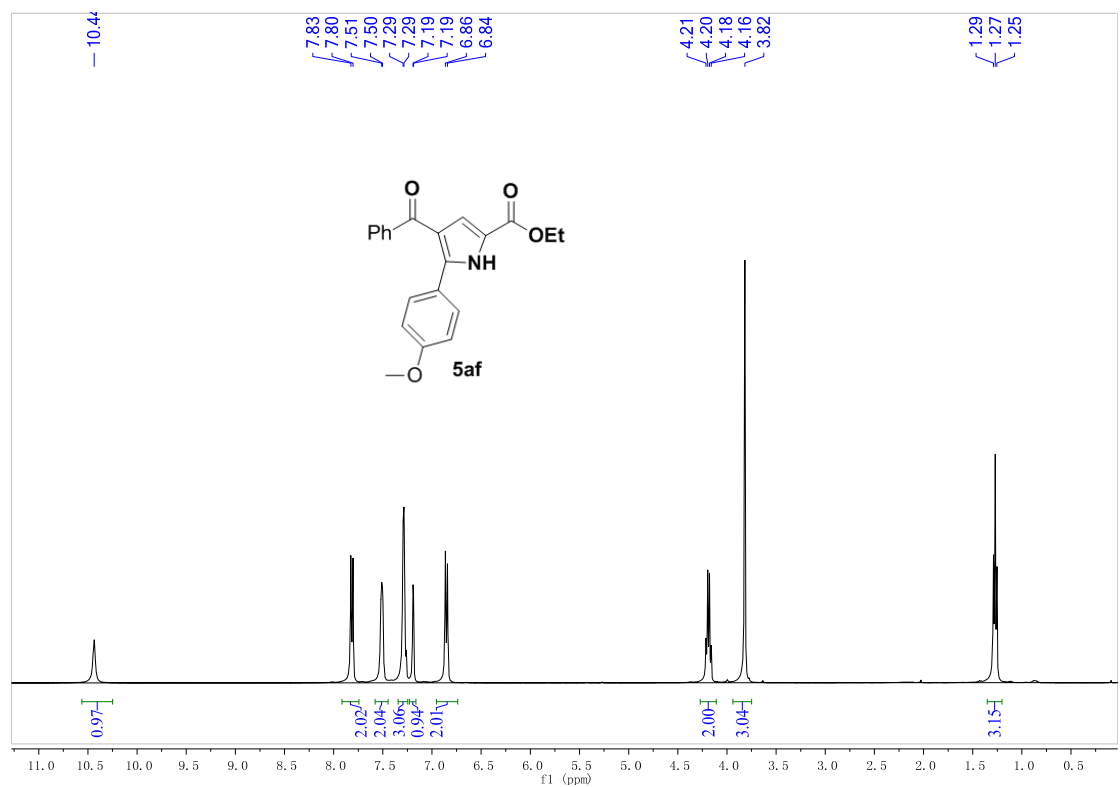

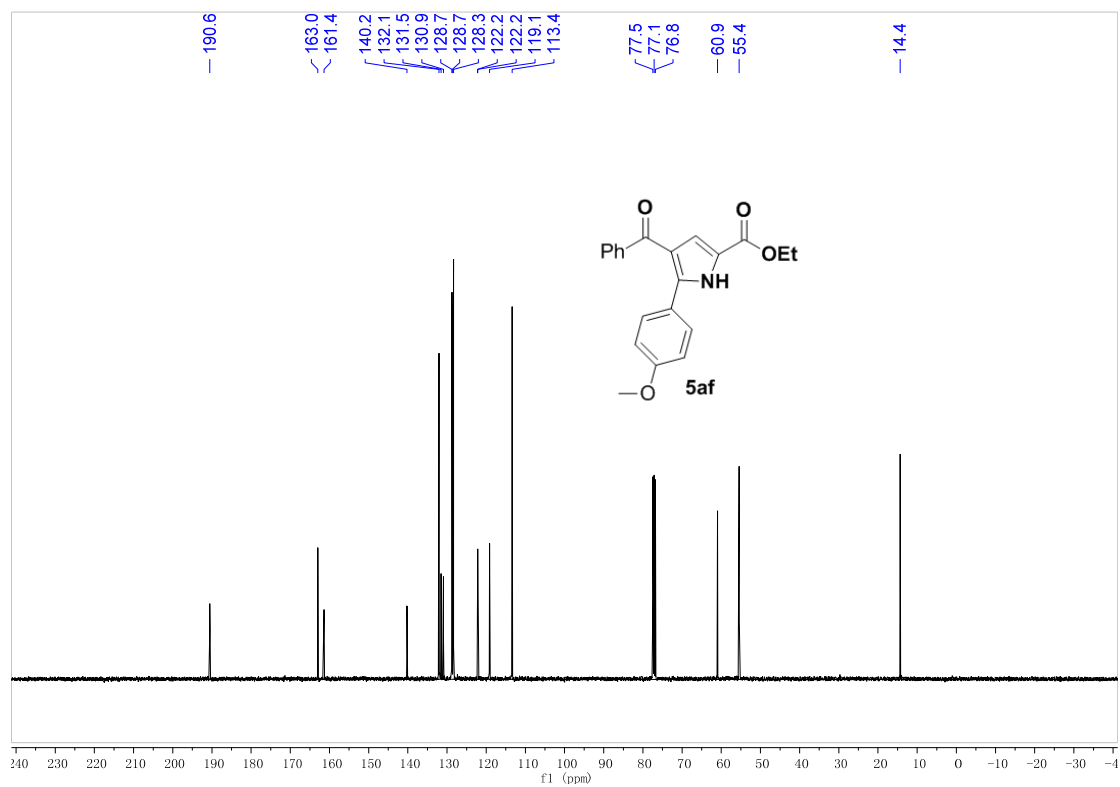

### 35. 5ag

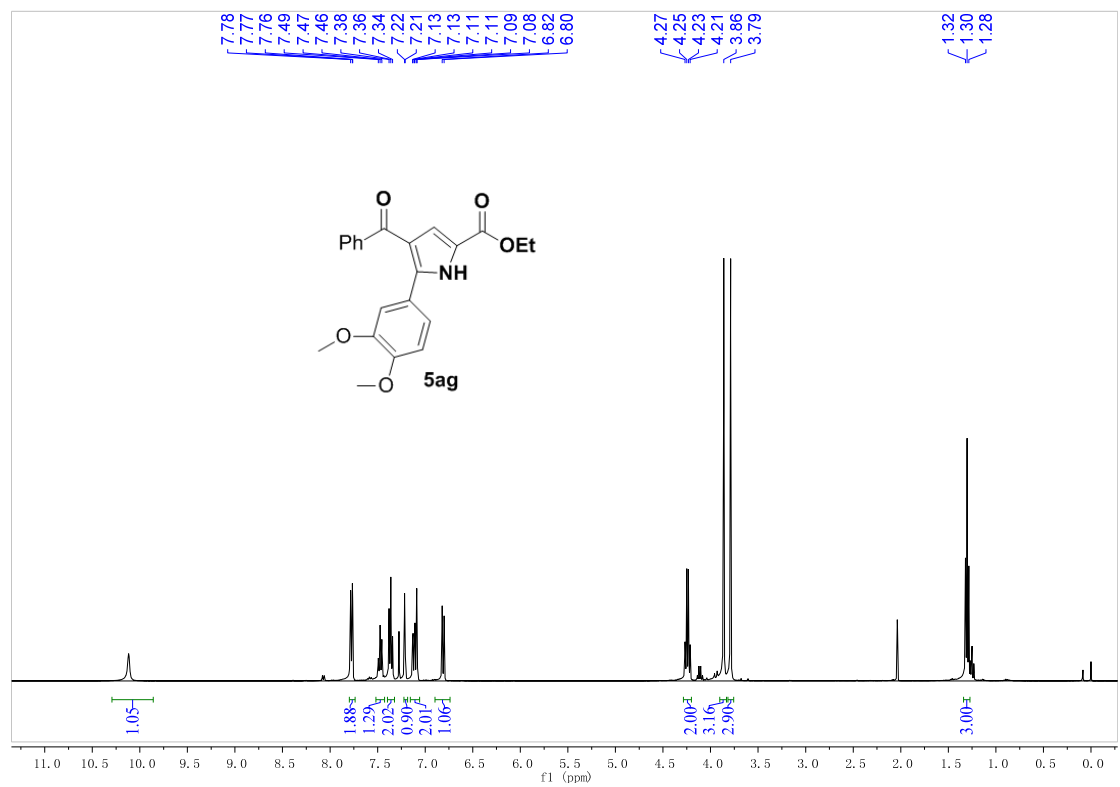

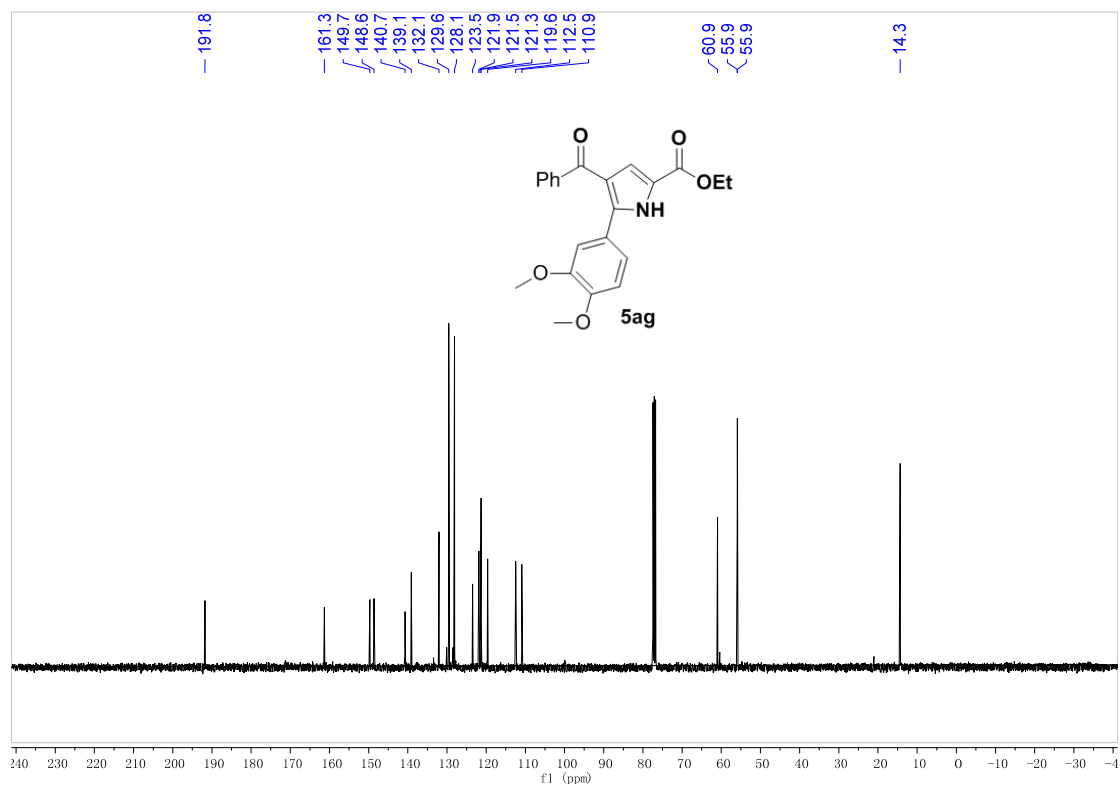

### 36. 5ah

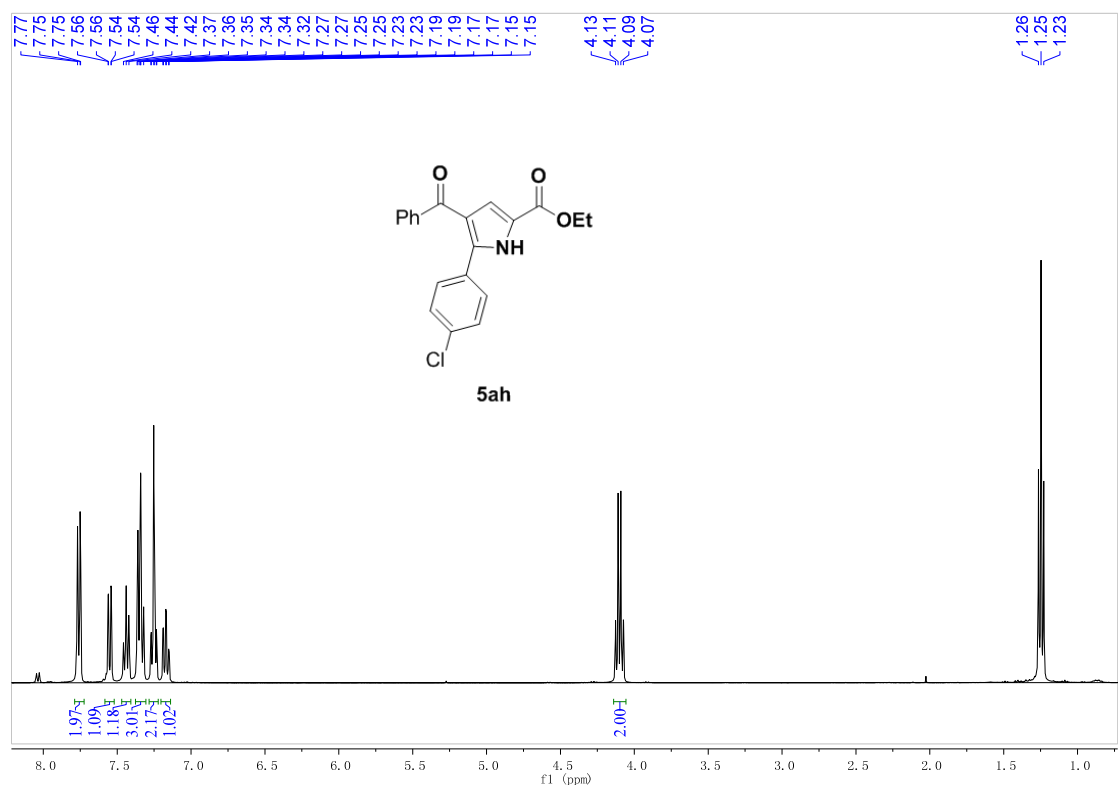

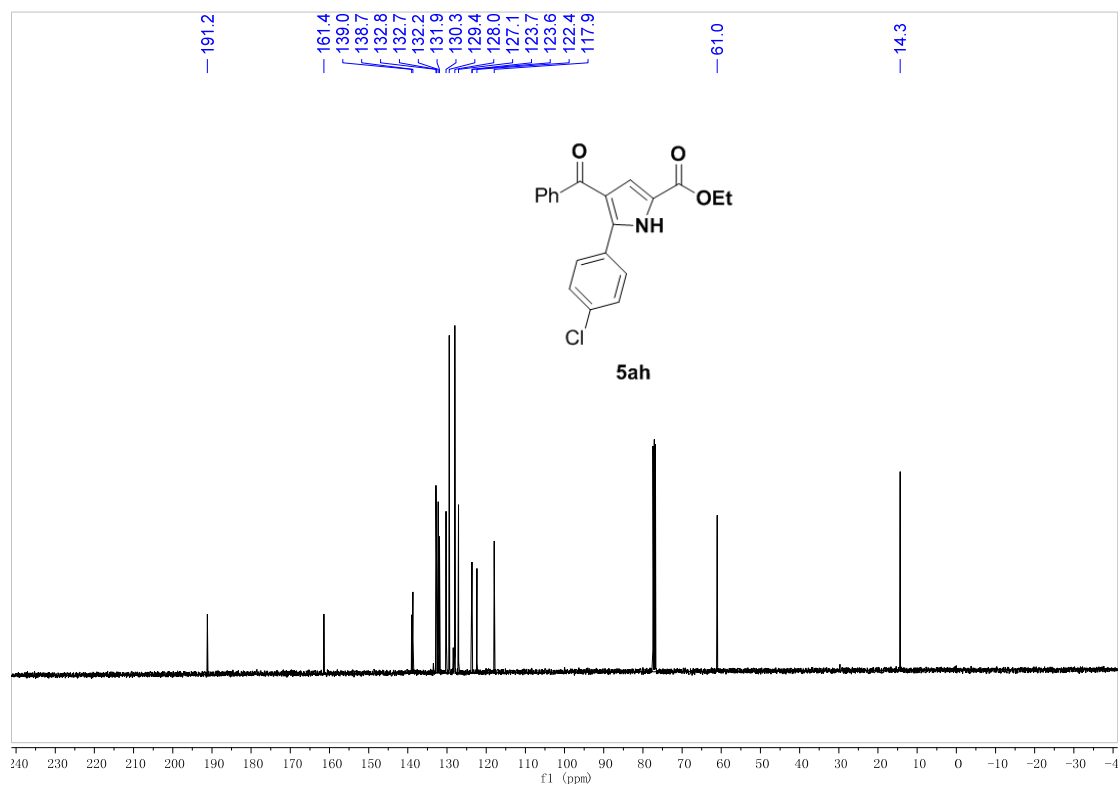

### 37.5ai

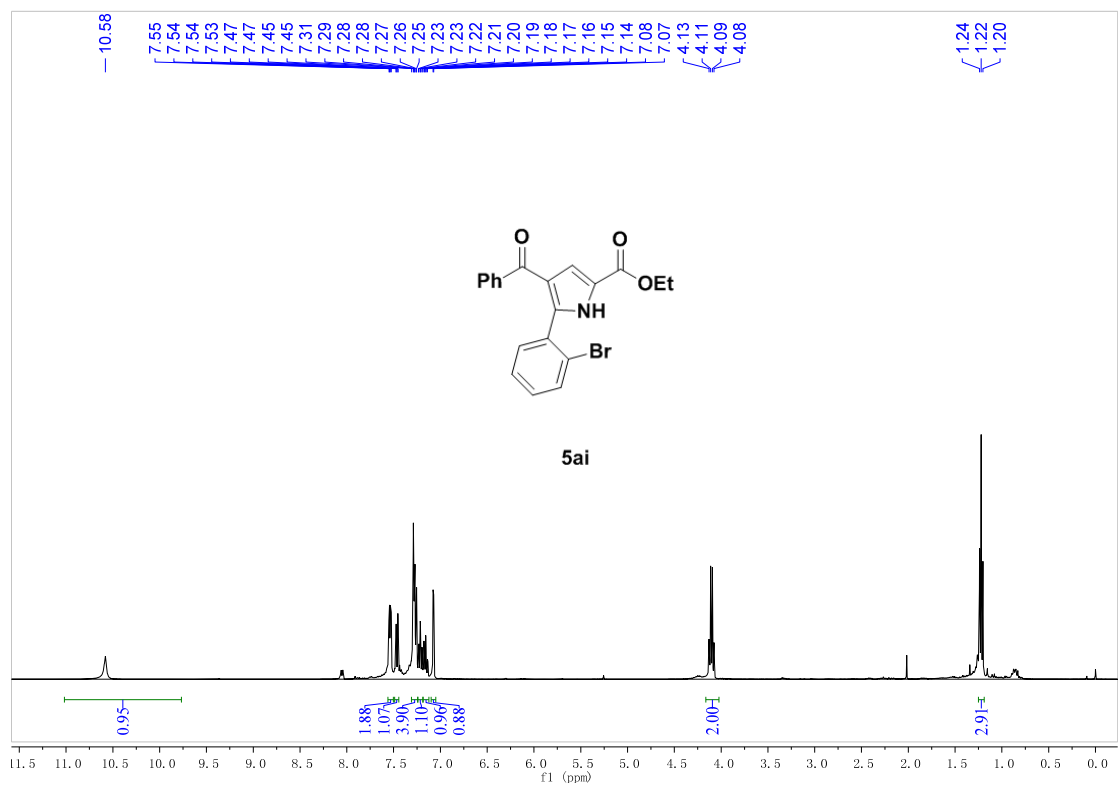

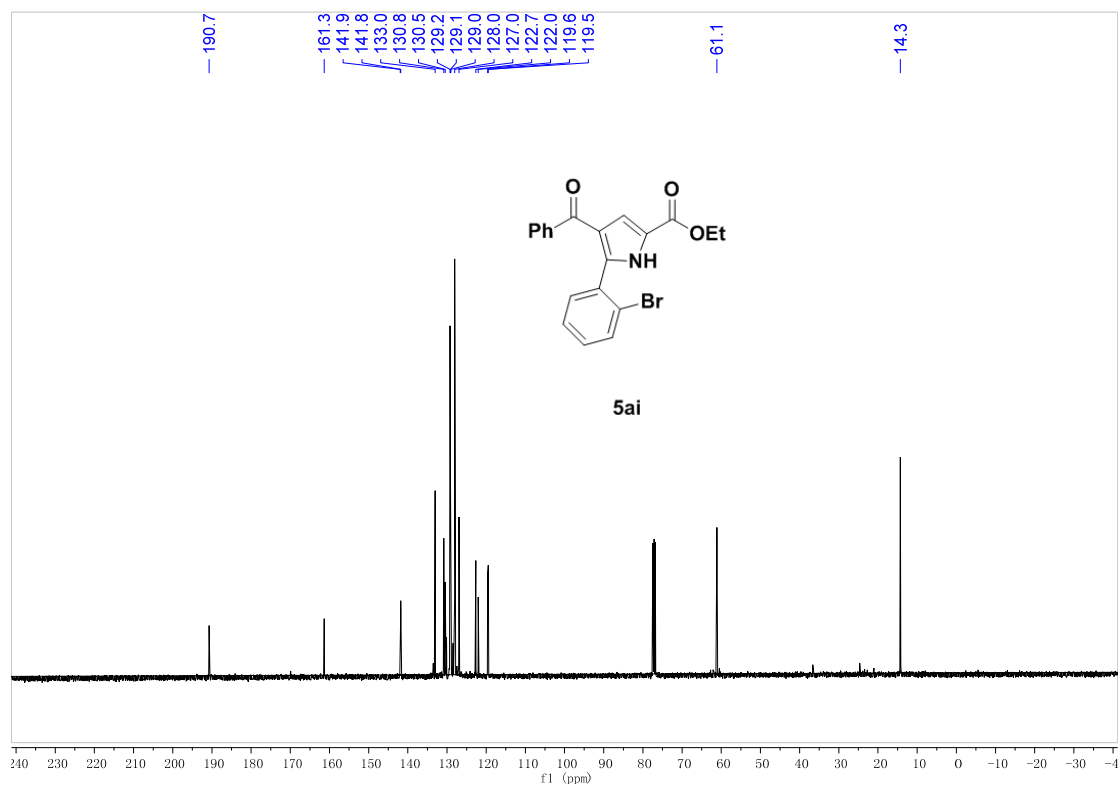

### 38.5aj

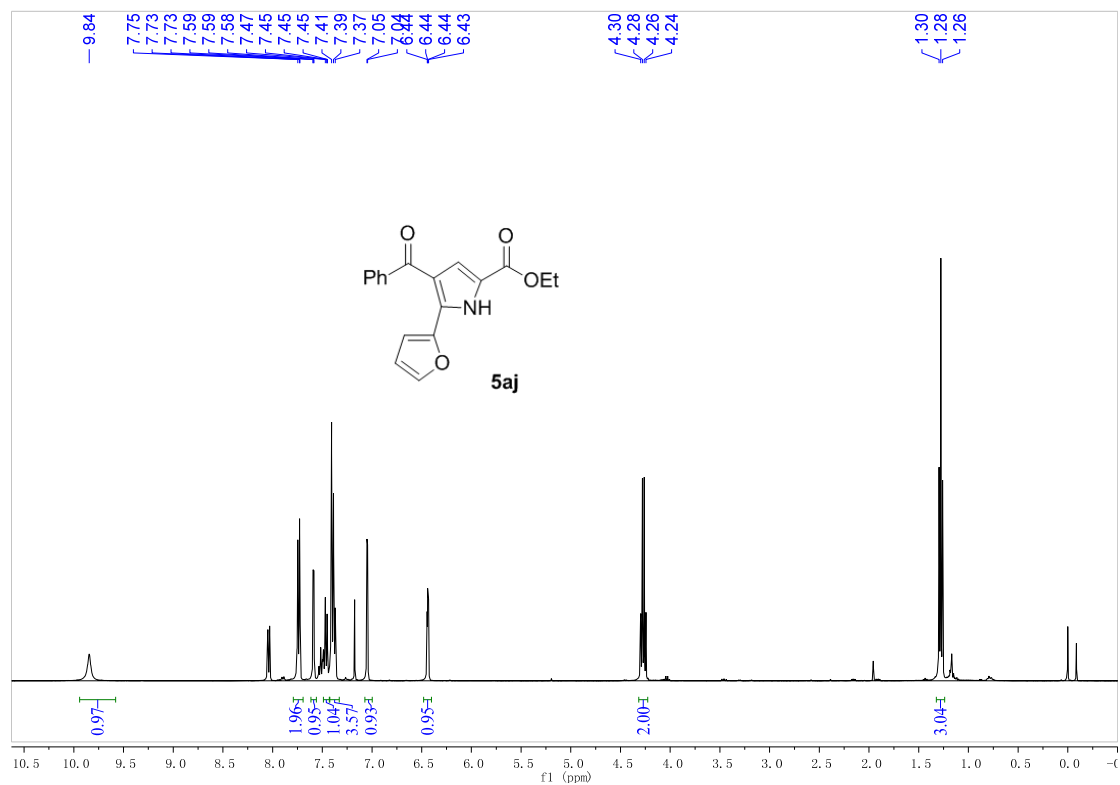

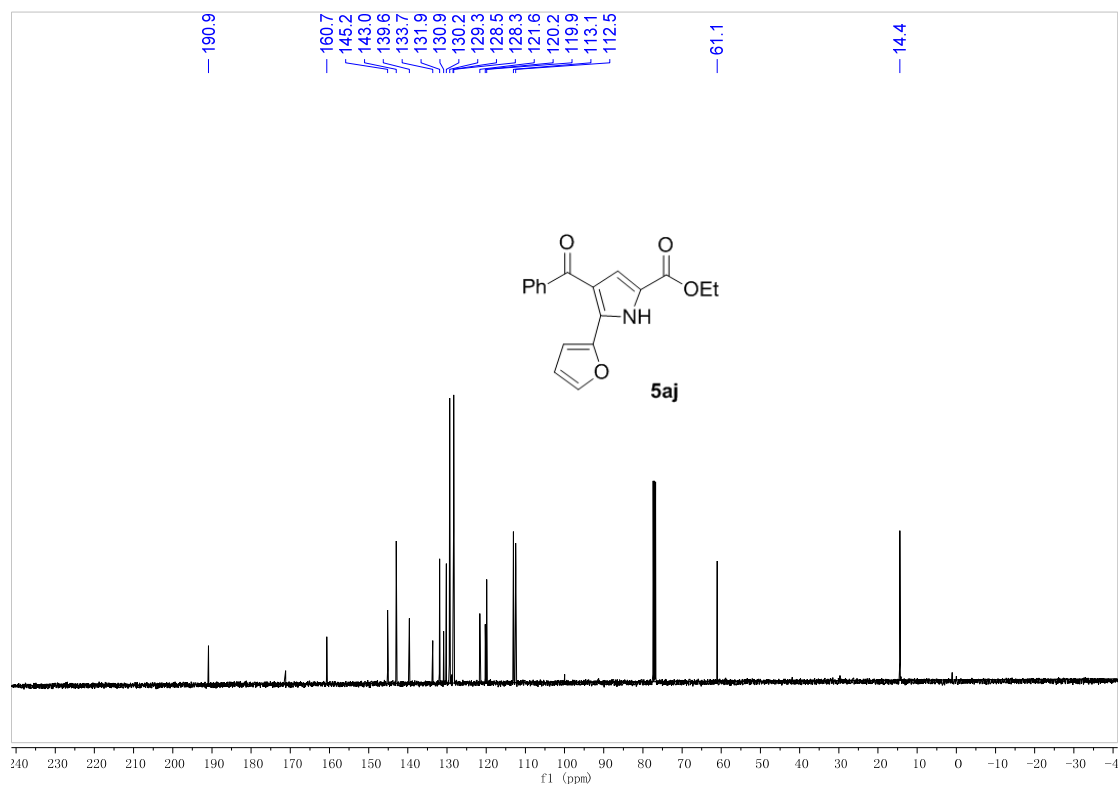

### 39. 5ak

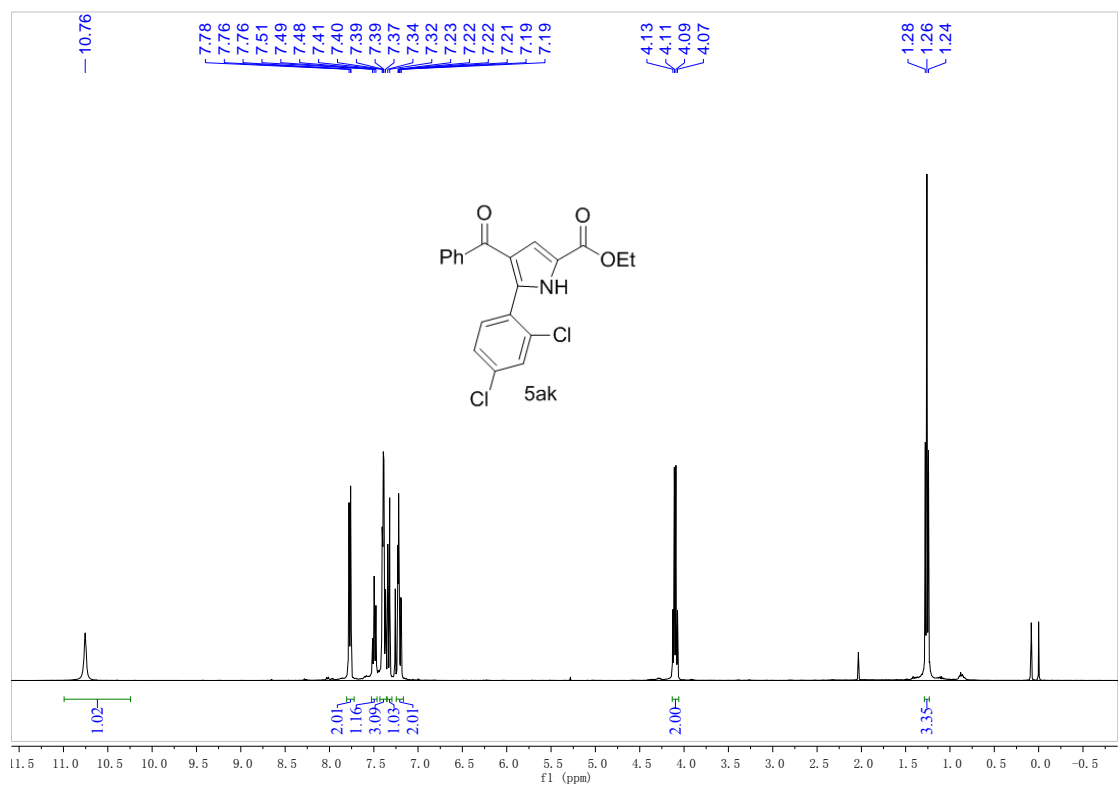

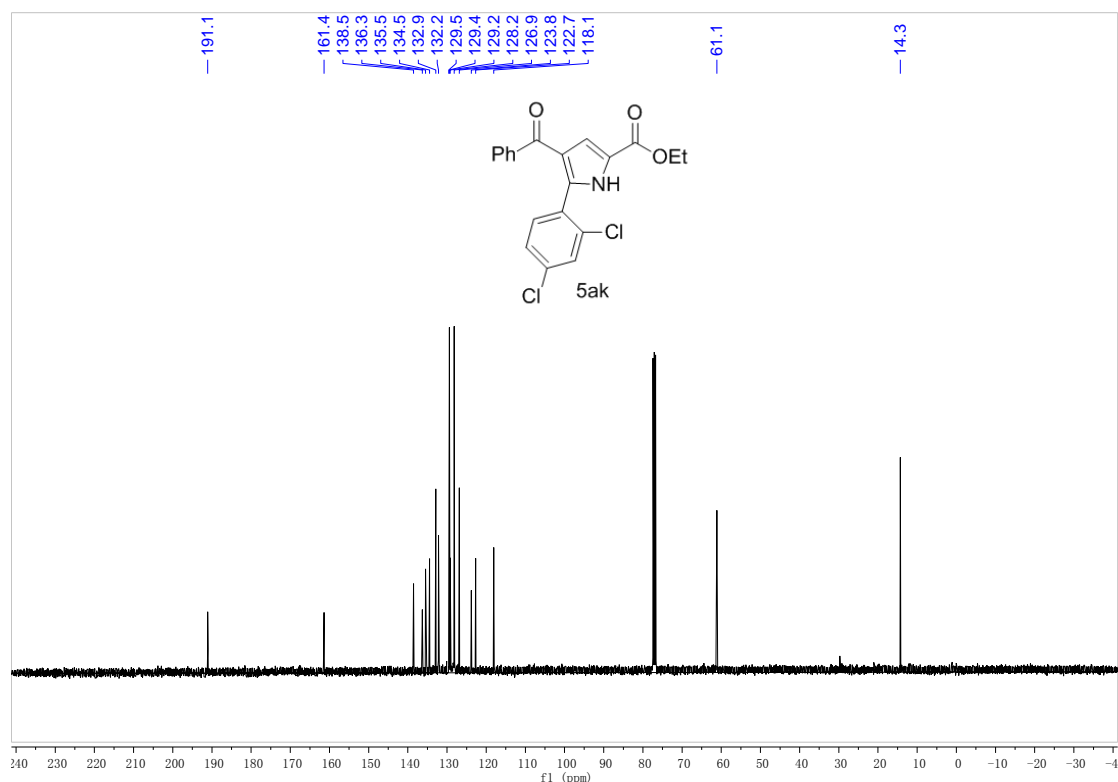

#### (4) NOE spectra for 4aa, 4af, 4ag and 4ab.

NOESY spectra for **4aa**(trans), **4aa** (cis), **4af**(trans), **4af** (cis), **4aj**(cis) and **4ab**(cis), where H<sub>b</sub> is easily distinguished with H<sub>c</sub> due to their different chemical shifts. Since H<sub>c</sub> locates on the same side with aroyl group on the cyclopropane ring, the resonance absorption peak of H<sub>c</sub> appears in the low field relative to that of H<sub>b</sub> for the deshielding effect.

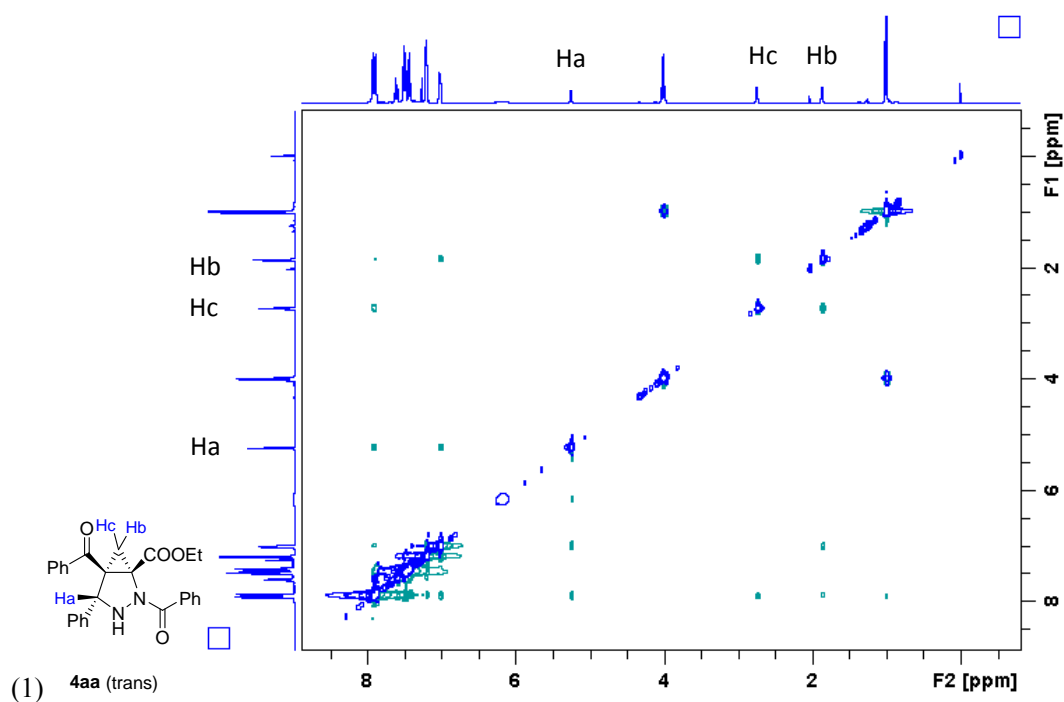

**Note:** the trans isomers can be confirmed as there has no relevance between **Ha** and **Hb** or **Hc**.



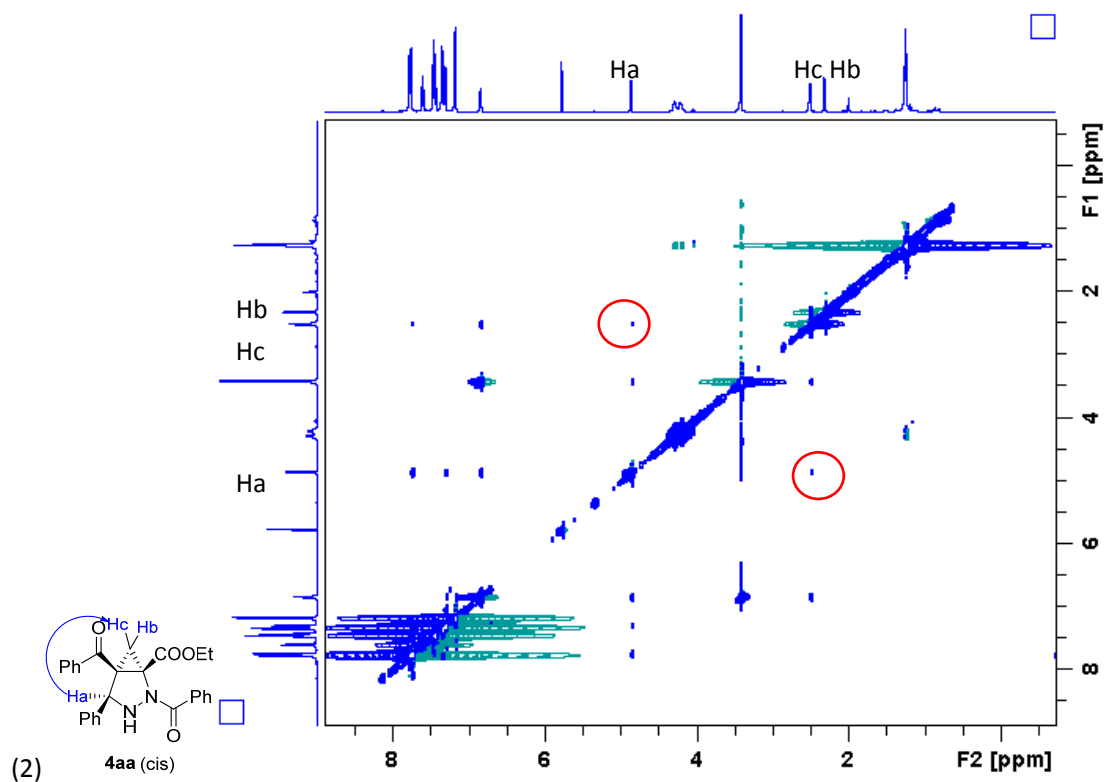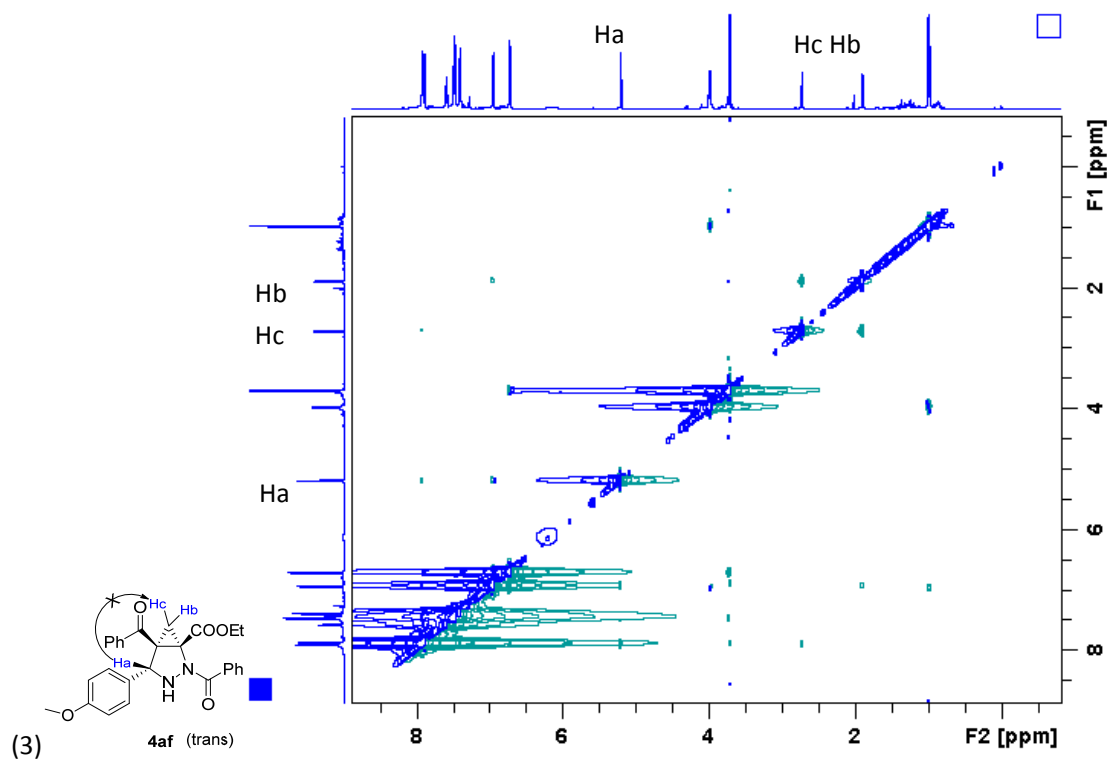

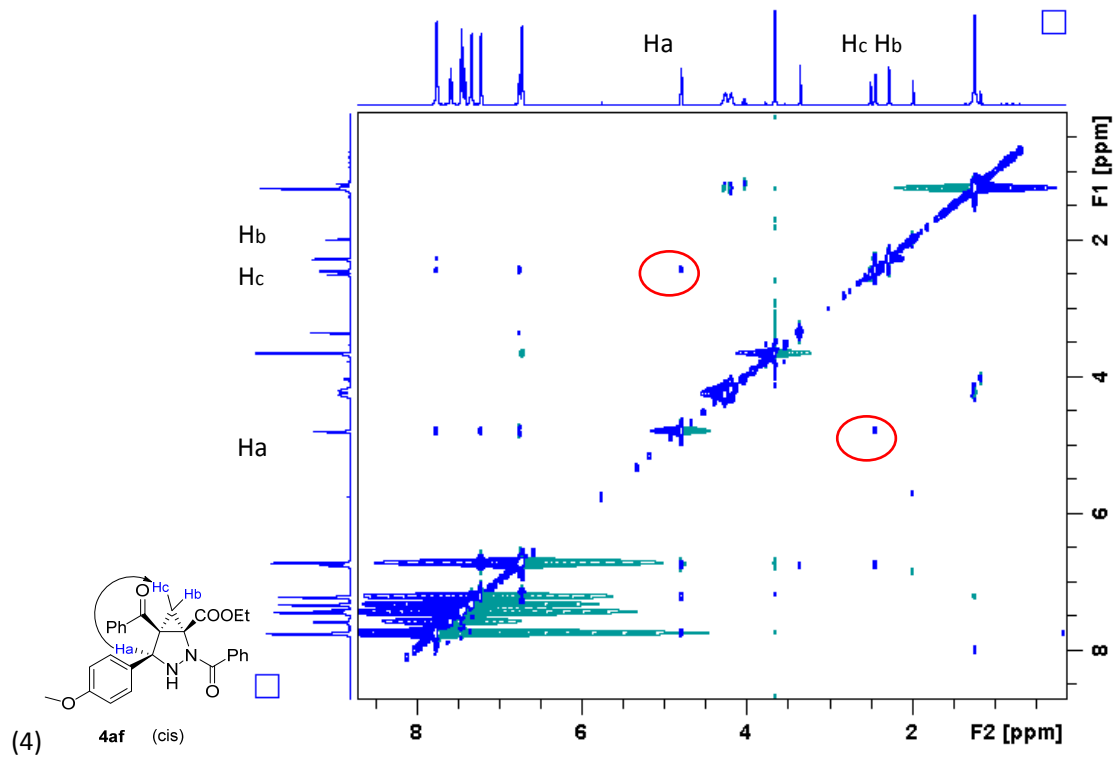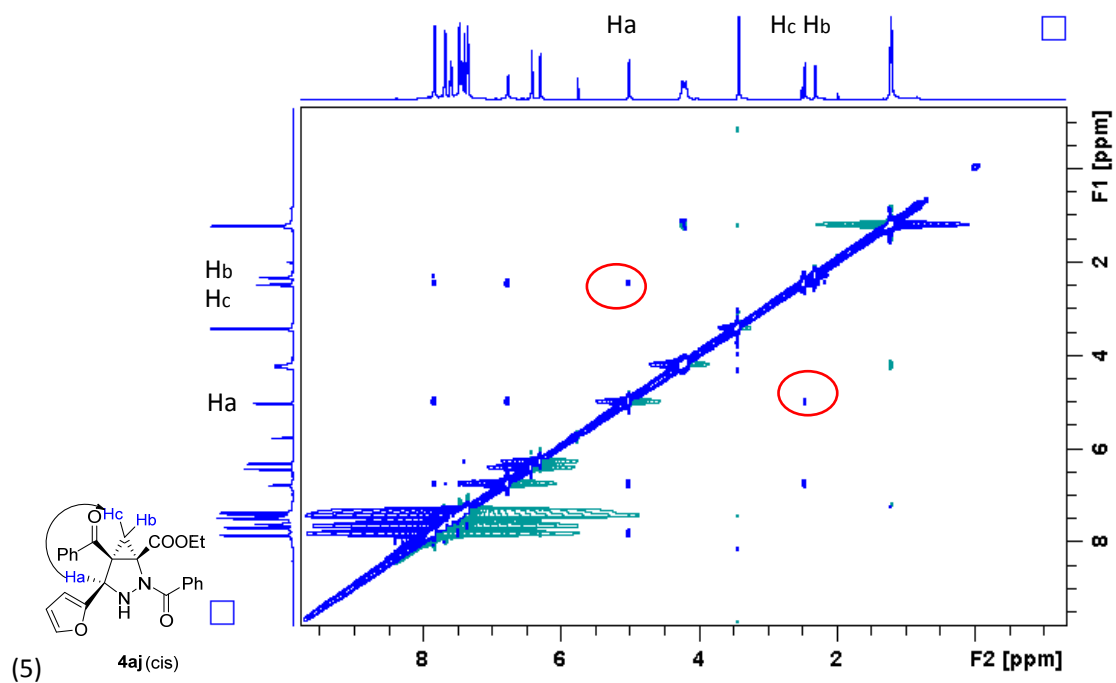

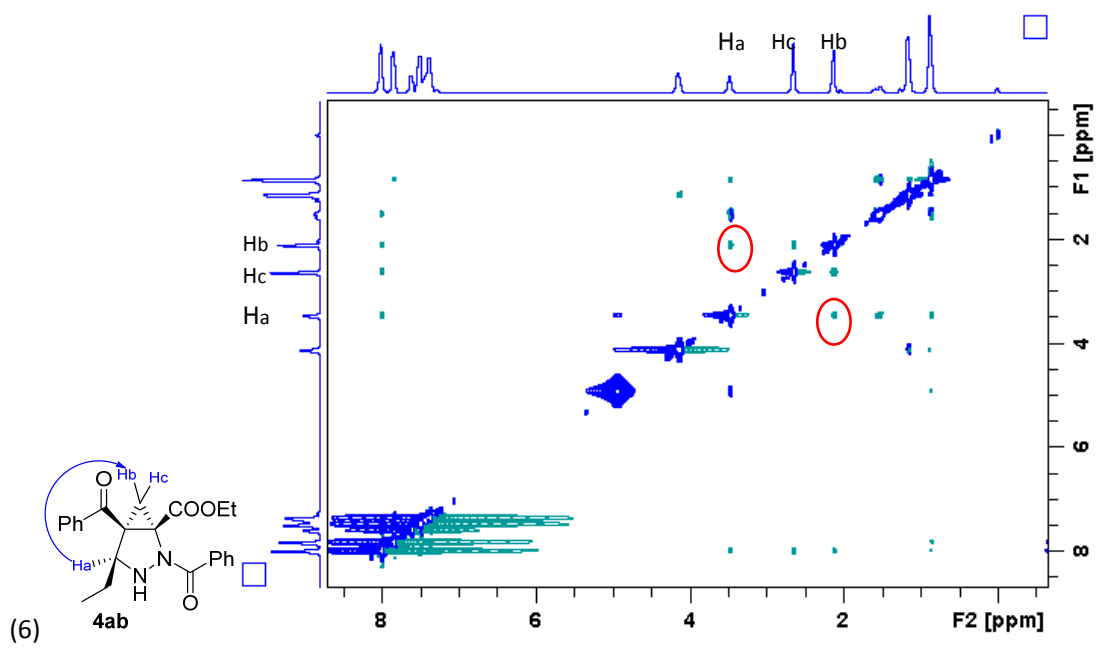

### (5) Crystallographic information for compound 4aa

CCDC (1404398), Formula:  $C_{27}H_{24}N_2O_4$ , Unit Cell Parameters: (1) a 10.919 (2) b 21.054 (3) c 21.054 (4) Pca21

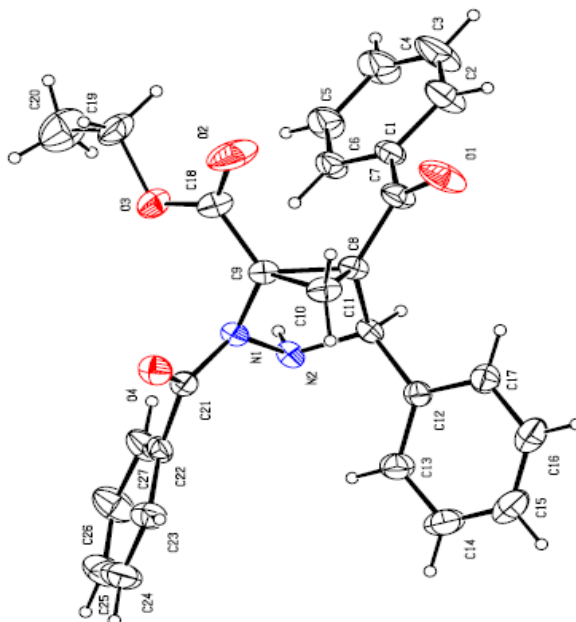

Figure 1 Crystal structure of 4aa (trans)

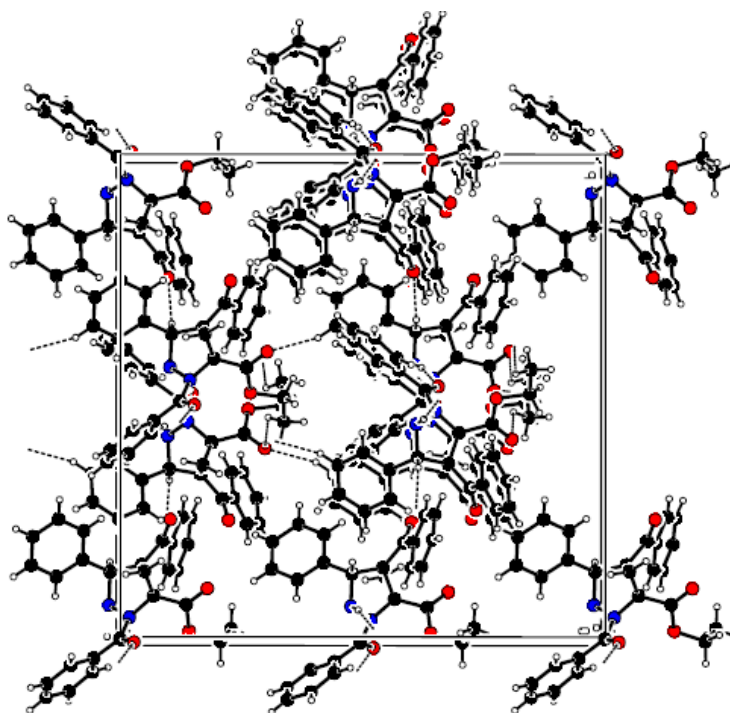

Figure 2 Projection of one unit cell
